# Supplementary material for: Biotransformation of polyunsaturated fatty acids to bioactive hepoxilins and trioxilins by microbial enzymes
Source: PubMed Central journal article supplement (PMC5760719; doi:10.1038/s41467-017-02543-8), 2018-01-09
Supplement: 41467_2017_2543_MOESM1_ESM.pdf [file 41467_2017_2543_MOESM1_ESM.pdf]

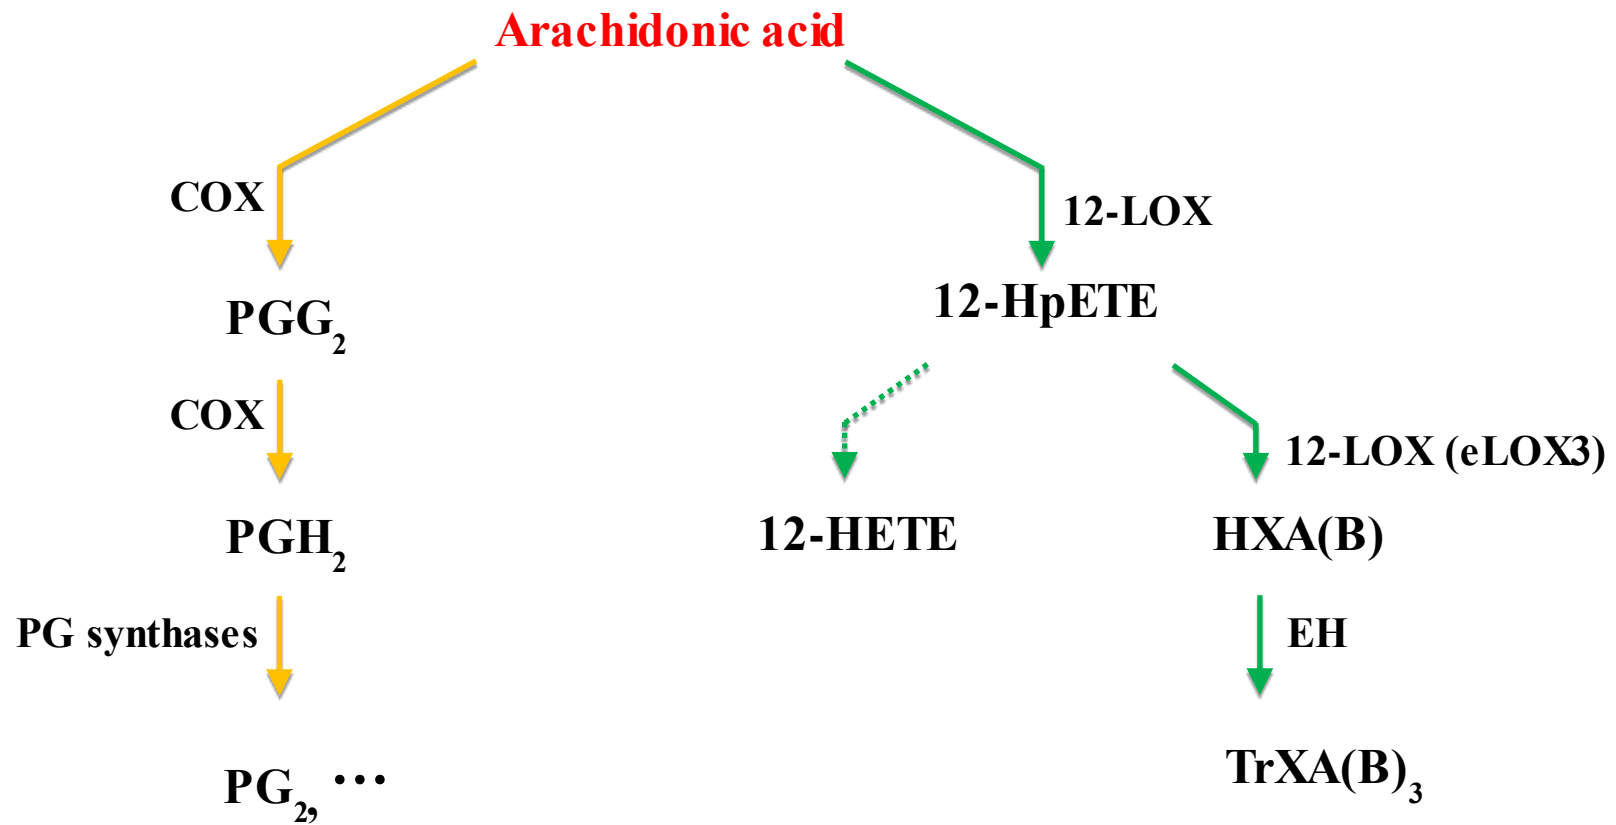

Supplementary Figure 1. Pathways of trioxilins and prostaglandins biosynthesis in human. TrXs: trioxilins; PGs: prostaglandins.

**a**

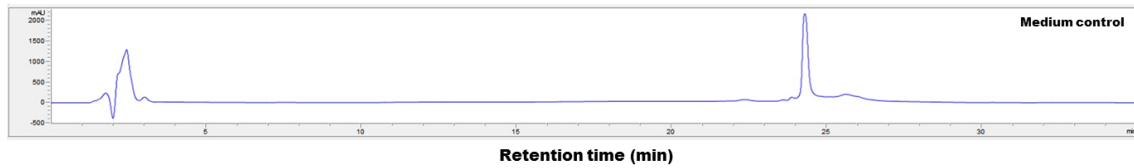

**b**

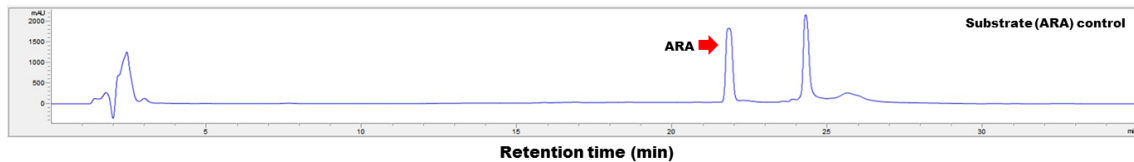

**c**

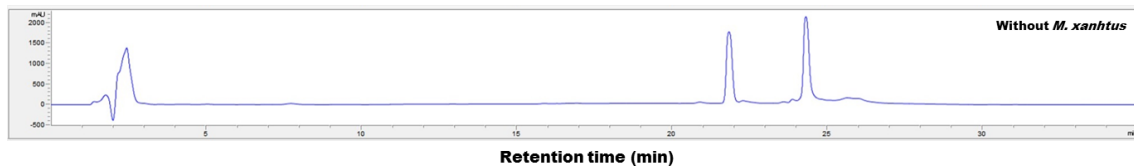

**d**

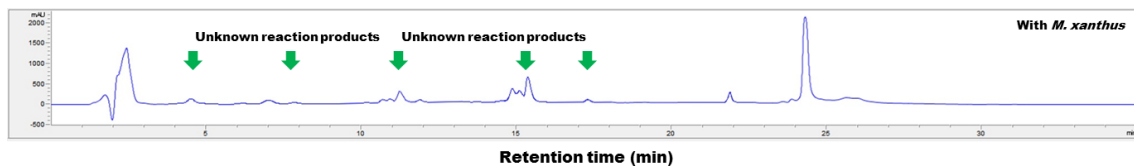

**Supplementary Figure 2. HPLC analysis of *Myxococcus xanthus* cultivation with arachidonic acid. (a)** HPLC analysis of only culture medium. **(b)** HPLC analysis of culture medium containing 1 mM arachidonic acid (ARA). **(c)** HPLC analysis of culture medium containing 1 mM ARA without wild-type *M. xanthus* after 24 h incubation. **(d)** HPLC analysis of fermentation broth containing 1 mM ARA with wild-type *M. xanthus* after 24 h incubation. The fermentations were performed 30 °C in Casitone broth at 200 rpm.

a

|                 |     |                                                               |     |
|-----------------|-----|---------------------------------------------------------------|-----|
| <b>HU 12LOX</b> | 1   | -----MGRYRIRVATGAWLF---SG---S-----YNRVQLW                     | 25  |
| <b>MX 1744</b>  | 1   | -----MTVEYKLTIRTGTCLG---AG---T-----DADISIV                    | 26  |
| <b>MX 1745</b>  | 1   | MSASVTRRGGADRRWDGRARGMGTGMMFAGLRRWMGALGGKGRESGSNEVLDAEELSRW   | 60  |
|                 |     | : : * : :                                                     |     |
| <b>HU 12LOX</b> | 26  | LVGTRGEAELELQLRPARG-E----EEEFDHDVAEDLGLLQFVRLRKHHW-----LVDDA  | 75  |
| <b>MX 1744</b>  | 27  | LVGTRGESAPRVLDKHFHN-DFEAGAEDVYALSSDGLDVLRLRFSNAGG-----VAAD    | 79  |
| <b>MX 1745</b>  | 61  | YSGLALEERLAISRELAPRVRAVRPAREPSTLPAVAVGRLVFEQDGPQGPIMPHHIKVEL  | 120 |
|                 |     | * * : . : : * * : :                                           |     |
| <b>HU 12LOX</b> | 76  | WFCDRITVQ-----GPGACAEEVAFPCYRWVQGEDILSLPEGTARLPGDNALDMFQKH    | 127 |
| <b>MX 1744</b>  | 80  | WLLDWAIVT-----AGEKQWHFPFYRWVLSGATVDVLEGTAKLARQASSERESTA       | 129 |
| <b>MX 1745</b>  | 121 | WRDRFGTPDDFLGEGFTDSGCF SIRYD-----PAD-----AGVNDLPDLEV--RFFEP   | 167 |
|                 |     | * * . . : . * . *                                             |     |
| <b>HU 12LOX</b> | 128 | REKELKDRQOIYCWAT-----W--KEGLPLTIAADRKDDL                      | 161 |
| <b>MX 1744</b>  | 130 | RRELLLEARQRMYPWRA-----PEMTEGLPGALDRLRPLP                      | 165 |
| <b>MX 1745</b>  | 168 | QHSFRPDGRVVEAWCRIGSEKGPDDHGLHYDFGTLRLPYWEYDPTTPLARLLVTEEGTP   | 227 |
|                 |     | : : * * : *                                                   |     |
| <b>HU 12LOX</b> | 162 | PNMRFHEEKRLDFEWTLKAGALEMALKRVYTLSSWNCLEDFDQIFWGQKSALAEKVRQC   | 221 |
| <b>MX 1744</b>  | 166 | KDELYRGLTEGSYEVVIAKT-LAAIKLNLPLMTRAWNGLVDIFDFFK---HLEVPQLAQR  | 221 |
| <b>MX 1745</b>  | 228 | PTAYAPG-----RALAMLKAVAPIEL-----VK-----RRHLL-----              | 255 |
|                 |     | * .                                                           |     |
| <b>HU 12LOX</b> | 222 | WQDDELFSYQFLNGANPMLLRRSTSLPSRLVLPFS---GMEELQAQLEKELQNGSLFEAD  | 277 |
| <b>MX 1744</b>  | 222 | WKDDLEFARQAVQGIAPLHITLVPSPQGMPLTDDVVRGLLSPGTTLARALDAKRIFLID   | 281 |
| <b>MX 1745</b>  | 256 | -----QGRLGQAPSLDRIQADYPEAMTVRM-----ERESPGSTRTDAFFGERLLNGM     | 302 |
|                 |     | * * * . * . : : . : : :                                       |     |
| <b>HU 12LOX</b> | 278 | FIL-LDGIPA-----NV---IRGE-----KQYLAAPLVMLKMEPNGKLPQPMVIQI      | 318 |
| <b>MX 1744</b>  | 282 | FEI-LDDIRM-----YR---KVGEDGVEERRWAPAARCLLYLDDQRLRPLAIQL        | 327 |
| <b>MX 1745</b>  | 303 | FSTLMDGDFEAPGDPEAFRLYFPWNAEYQDGV---HCLPDVDVRLRL-VEGRLLPVRIIL  | 358 |
|                 |     | * * . : : * : * : * * : *                                     |     |
| <b>HU 12LOX</b> | 319 | QPNPNS-----SPTPTLFLPSDPPLAWLLAKSWVRNSIFQLHEIQYHLNTHVAEVIIV    | 373 |
| <b>MX 1744</b>  | 328 | GRDA-----QKDPVFTPNDDAYDWLAAKIYLRCSEGNHQMVSHALRTHFVAEPPFVM     | 379 |
| <b>MX 1745</b>  | 359 | GMREPGATAPGSPVTRRSYTPADGEAWEAAKRMARVSPITLETELGNHLGQCHFNVEQYAI | 418 |
|                 |     | * * * * * : : * . * * : *                                     |     |
| <b>HU 12LOX</b> | 374 | ATMRCLPGLHPFIKFLIPIHRYTMEINTHARTQLISDGGIFDIAVSTGGG--GHVQLLRR  | 431 |
| <b>MX 1744</b>  | 380 | ATMRNLPDPHPVYKLLRRHFRYTLAINEQARKGLLDAGGVDFDFIATGGPDKGHLQLGKK  | 439 |
| <b>MX 1745</b>  | 419 | AAHRNLRR-SPLRWLLMPHLREVVLINHSANGFLVGPYITRBSALTERSVETRLHLM     | 477 |
|                 |     | * : * * * : * : * * : * * . * : * : *                         |     |
| <b>HU 12LOX</b> | 432 | AAAQTYCSLCPDLDLADRGLLG---LPGALYAHDALRLWEIIARYVEGIVHLFYQRDD-   | 487 |
| <b>MX 1744</b>  | 440 | GFQRWTLADNKPRADLRRGVLDPAVLNYPYRDDALPLWDAFEEYVGGVLRHFYRTDA-    | 498 |
| <b>MX 1745</b>  | 478 | GSYDWKGFAPAP-----PICESHRYARAAGLFWRLVGEHVD---AFFAEHGA          | 521 |
|                 |     | * . * * * * * : * * . : *                                     |     |
| <b>HU 12LOX</b> | 488 | IVKGD-PELQAWCREITEVGLC-----                                   | 508 |
| <b>MX 1744</b>  | 499 | DLEAD-TEMQQWKKDLTEHGLP-----                                   | 519 |
| <b>MX 1745</b>  | 522 | ALEAQWSEVRRFSDDLVGHSAPAFVCRYLRATVPGRAAPFVRSERMDLDAKVAATHAKA   | 581 |
|                 |     | : : : * : : : . .                                             |     |
| <b>HU 12LOX</b> | 509 | ----QAQDRGFVPSFQSQSQLCHFELTMCVFTCTACHAAINQGLDWYAWVPNAPCTMRMP  | 564 |
| <b>MX 1744</b>  | 520 | ----VDKLP--CRELRRVDDLVDILTTLVFTVSVCHAAVNYLQYEHYAFVPNAPLSMRRE  | 573 |
| <b>MX 1745</b>  | 582 | VSAVTRTDAPQPGEMEALKQLCRY---VIYFATFHAWANNLQWDDAGEVLYACLGLRWG   | 638 |
|                 |     | : . . : * : : : * * : * * : * * : *                           |     |
| <b>HU 12LOX</b> | 565 | PPTTKEDVTMATVMGSLPDVROACLQMFISWHLSRR---QPDMVPLGHHKEKYFSGPKPK  | 621 |
| <b>MX 1744</b>  | 574 | PPRQKGLTRAEDIPEMIPTKSQMLWQVLSRALSSFGDDEEYLLHEGGWREEYFHEPELV   | 633 |
| <b>MX 1745</b>  | 639 | KAGA---LSTEADHDVAPPPEATEMLVLSWMLSKTSYG-----FLLANEEA           | 682 |
|                 |     | : : * : * : * * : : :                                         |     |
| <b>HU 12LOX</b> | 622 | AVLNQFRIDLEKLEKEITARNEQLDWPYELKPSCIENSVTI                     | 663 |
| <b>MX 1744</b>  | 634 | AIRQRQERLRAQREAVEARNAGAEPYTIILRPDRIPCGITV                     | 675 |
| <b>MX 1745</b>  | 683 | DVHPRFVECLRAHAAEFSALGMDIR-----TVSSRINI                        | 715 |
|                 |     | : : * * . * . : : :                                           |     |



C

|                 |     |                                                                         |     |
|-----------------|-----|-------------------------------------------------------------------------|-----|
| <b>HU LTA4H</b> | 1   | MPEIVDTCSLASPASVCRTKHLHLRCSVDFTTRTLTGTAALTQVSQEDNLRSLVLDTKDL            | 60  |
| <b>MX 5137</b>  | 1   | MARL-DPHSYN-DSTQPETETLDWRARVDFKTQRLHAEVTH--TLKEASAGPLDLDTRDL            | 56  |
|                 |     | * . : * * : : . : * . * . * . * . : * . . : : * . * * * : * *           |     |
| <b>HU LTA4H</b> | 61  | TIEKVV-INGQEVKVALGERQSYKQSPMEISLPIALSKNQEIVIEISFETSPKSSALQWL            | 119 |
| <b>MX 5137</b>  | 57  | EIRDVIDAAGRPLPYILSPSEPILGSRLRIELPVGLRQ-----FTVRYRTAPHASALQWL            | 111 |
|                 |     | * . . : * : : * * . : * * : * . * . * . : : : : * : * : * * * * *       |     |
| <b>HU LTA4H</b> | 120 | TPEQTSGKEHPYLFSSQCAIHCRAILPCQDTPSVKLTYTEVSVPKELVALMSAIRDGET             | 179 |
| <b>MX 5137</b>  | 112 | TPSQTAGGKHPFLYSQCAIHARSVVPLQDTPRIRIRYASLRIPKALKAVMAASFLRRE              | 171 |
|                 |     | * . * . * : * * : * * * * * . * : * * * * * : * * * . : * * * * * * *   |     |
| <b>HU LTA4H</b> | 180 | PDPEDPSRKIYKFIQKVPIPCYLIALVVGALERSQIGPRTLWSEKEQVEKSAYEFSETE             | 239 |
| <b>MX 5137</b>  | 172 | E---HGVEAEHYEMPQPVPYPYLLAFVAVGSLAPKELGPRSRVWAEPELLEDAEEFSGVD            | 228 |
|                 |     | . . : : * : * * : * . * * : * * * * : * * * * * * * * * * . :           |     |
| <b>HU LTA4H</b> | 240 | SMLKIAEDLGGPYVWQYDILLVLPSPFPYGGMENPCLTFVPTLLAGDKSLSNVIAHHS              | 299 |
| <b>MX 5137</b>  | 229 | DMLRAAESLFGPYDWERFDLLTMPPSPFPYGGMENPRLTFLTPTLITGDKSLVNVVHFLA            | 288 |
|                 |     | . * : * . * * * * * : * * * . : * * * * * * * * * * * * * * * * * * * * |     |
| <b>HU LTA4H</b> | 300 | HSWTGNLVTNKTWDHFWLNEHSHTVYLERHICGRLEFGEKFRHFNALGGWGELONSVKTFFE          | 359 |
| <b>MX 5137</b>  | 289 | HSWTGNLVTNASAEHFWLNEHSFTVFAERRILEVLEGEVVSALHGALGRRALDSALQHFR            | 348 |
|                 |     | * * * * * * * * : * * * * * * * * * * * * * * * * * * * * * * * * *     |     |
| <b>HU LTA4H</b> | 360 | THPFTKLVDLTDIDPDVAYSSVYKKGFFALLFYLEQLLGGPEIFLGFLLKAYVEKFSYKS            | 419 |
| <b>MX 5137</b>  | 349 | HPQLTSLRTHLAGVDPDEAFSQIHYKGYLLLRAMEDAAGRP-AFDEFLLRYLATYRFRA             | 407 |
|                 |     | * . * . . : * * * * * * * * * * * * * * * * * * * * * * * * * * * * *   |     |
| <b>HU LTA4H</b> | 420 | ITDDWKDFLYSYFKDKVDVLNQVDWNAWLYSPGLPPIKPNYDMILTNCIALSQRWITA              | 479 |
| <b>MX 5137</b>  | 408 | LTTEEFVAFAE---KELPGVLTKVDAEAYLHRPGVPPGAPSPRSRLREAMDALRGKVPTP            | 464 |
|                 |     | * * : * * * : * . * . * * * * * * * * * * * * * * * * * * * * *         |     |
| <b>HU LTA4H</b> | 480 | KEDDLNSFNATDLKDLSSHQLNEFLAQLQRAPLPLGHIKRMQEVYFNAINNSEIRFRW              | 539 |
| <b>MX 5137</b>  | 465 | -----EQAKDWTPAEWQLYLES--LPWDIPRDVIQQLDARFSLTESRNSEVLVAW                 | 512 |
|                 |     | : * * : : : * . * . * * * * * * * * * * * * * * * * * * * * *           |     |
| <b>HU LTA4H</b> | 540 | LRLCIQSKWEDAIPALKMATEQGRMKFTRPLFKDLAAFDKSHDQAVRTYQEHKASMHFV             | 599 |
| <b>MX 5137</b>  | 513 | LVVALRADWEPVAVARTETFLGEVGRMKYLYKPLYGVLSASHAHRSLARALFKKHGERYHPI          | 572 |
|                 |     | * : * * * * * * * : : . : * * * * * * * * * * * * * * * * * * * * *     |     |
| <b>HU LTA4H</b> | 600 | TAMLVGKDLKVD                                                            | 611 |
| <b>MX 5137</b>  | 573 | ARQGVELILSRA                                                            | 584 |
|                 |     | : * * *                                                                 |     |

d

|                 |     |                                                                   |     |
|-----------------|-----|-------------------------------------------------------------------|-----|
| <b>HU PTGS2</b> | 1   | MLARALLLCAVLALSHTANPCSSHPCQNRGVCMSVGFQYKCDCTRITGFYGENCSTPEFL      | 60  |
| <b>MX 5217</b>  | 1   | -----MDEMEGTVPVA-----GV-----STGVPRPAAA                            | 24  |
|                 |     | : : . * . : * . * * : : : . . . *                                 |     |
| <b>HU PTGS2</b> | 61  | TRIKLFL----KPTPNTVH--YIL-----THFKGFVNWNIPFLRNAIMSYV               | 102 |
| <b>MX 5217</b>  | 25  | RRIKPVAKSTLRPFRRIVASRALSGVFSGLNRVIAWHRLPKFLGLLNLIPIRD-ELRAKN      | 83  |
|                 |     | * * * . : * . * * : : : * : * : * * * : : *                       |     |
| <b>HU PTGS2</b> | 103 | LTSR----SHLIDSPPTYNADYGYKSWE--AFSNLS-----YYTRALPPVPDDCPT          | 147 |
| <b>MX 5217</b>  | 84  | LYDTTHLPSTQAPEPPTWDPPELATRRASDGTYNLDSNPRMGAAGTRFGRNV-PLENAWPE     | 142 |
|                 |     | * . * . * * * : : : . . : : * * : * : * : *                       |     |
| <b>HU PTGS2</b> | 148 | PLGVKGGKQLPDSNEIVEKLLLRKFI PD PQGSNMMFAFFAQHFT H DFFKIDH-KRGPAP   | 206 |
| <b>MX 5217</b>  | 143 | PEP---ALLEPSPRVISNRLLARQSFPATS-LNLLAAAWIQFMT H D WFDHGSPKRGEF     | 198 |
|                 |     | * . . * . * : * * * : * * * . * : * : * : * : * * * *             |     |
| <b>HU PTGS2</b> | 207 | TNGL-----GHGVDLNHIYGETLARQ                                        | 227 |
| <b>MX 5217</b>  | 199 | KVPLDKERGDWSSEDPMRIIRTPEDPTRIPGAKDGPPTYINQHSQWWDASQIYGSNEEET      | 258 |
|                 |     | . * : * : * * * . .                                               |     |
| <b>HU PTGS2</b> | 228 | RKLRLFKDGKMK----YQIIDGEMYPPTVKDTQAEMIYPPQVPEHLRFVAVQEVFGLVPG      | 283 |
| <b>MX 5217</b>  | 259 | RALRCTDDEDGGQRRGKLLITGEGE-----EAQLPVDPNTHL--QKSGVTHNWWIG          | 307 |
|                 |     | * * * . * . * : * * * * * : * * : * * * . . . * *                 |     |
| <b>HU PTGS2</b> | 284 | LMMYATIWLRHNRVCDVLKQEHPEWGDEQLFQTSRLILIGETIKIVIEDYVQHLS----       | 339 |
| <b>MX 5217</b>  | 308 | LSLLHTTFAKEHNAIVDRRLRLEFPDWNGDRLFHTARLINTALMAKIHTIEWTPAILAHT      | 367 |
|                 |     | * : * : * * * : * * * : * * * : * * * : * * * . * * : : . :       |     |
| <b>HU PTGS2</b> | 340 | -----GYHFKLKF----DPELLFN-----KQFQYQNRIAAEFNTIY H H H L            | 376 |
| <b>MX 5217</b>  | 368 | TETALNINWGLVGQRVIRLFGMRSRSELSIGIPGSEVNHGVPFALTEEFVAVY R M H S L   | 427 |
|                 |     | * : . . * * * : . . : : . : : * * : * * : * *                     |     |
| <b>HU PTGS2</b> | 377 | LPDTFQIHDQKYNQQFIYN-----NSILLEHGI-----T                           | 406 |
| <b>MX 5217</b>  | 428 | IPDTMRLHRMRDGVQVREVAMVDLAGPNTLKALEDGLTMVDLCYSFGISHPGALVLHNYP      | 487 |
|                 |     | : * * * : * * : . * . * * * : * * * * * * * *                     |     |
| <b>HU PTGS2</b> | 407 | QFVESFTRQIAGRVAGGRNVPPAVQKVSQASI--DQSRQMKYQSFNEYRKRFLKPYESF       | 464 |
| <b>MX 5217</b>  | 488 | AFLRDLHRQD----PDG-----AESRVDLASIDVMDRREGVPRYNAFRKLMHLQPARSF       | 538 |
|                 |     | * : . . : * * . * * * . * * : * * : * * : * * : * * . * *         |     |
| <b>HU PTGS2</b> | 465 | EELTGEKEMSAEALYGDIDAVELYPALLVEKPRPD AIFGETMVEVGAPFSLKGLMGNV       | 524 |
| <b>MX 5217</b>  | 539 | KDITRNEQWARELREVGHVDRVDMVGM LAEDPPRGFGFSDTAFRVFILMASRRLA---       | 595 |
|                 |     | : : * * : : : * * . * * * * * * . * * * * * . * * * . * * : : : * |     |
| <b>HU PTGS2</b> | 525 | ICSPAYWKPS---TFGGVEVGFQIINTASIQSLICNNVKGCPFTSFSVPDPELIKTVTINA     | 581 |
| <b>MX 5217</b>  | 596 | --SDRFFTNDQNVNLYTQPGMAWLNENTMASVLLRHYPGL-----APALRQT-----         | 640 |
|                 |     | * : : . . : : * * : * * : * * : * * : * * : * * : * * : *         |     |
| <b>HU PTGS2</b> | 582 | SSRSRGLDDINPTVLLKERS--TEL--                                       | 604 |
| <b>MX 5217</b>  | 641 | ---RNAFAPWEPVSMVATEPPAGSLH                                        | 664 |
|                 |     | * . . : * . : : . . *                                             |     |



**Supplementary Figure 3. Amino acid sequences alignment of the enzymes in *Myxococcus xanthus*.** (a) Candidates of lipoxygenases (LOXs). The GenBank accession numbers of human 12-LOX, *MX\_1744*, and *MX\_1745* are P18054, Q1DBH9, Q1DBH8, respectively. (b) Candidate of epoxide hydrolase (EH). The GenBank accession numbers of human bifunctional EH2 and *MX\_1644* are P34913 and Q1DBS7, respectively. (c) Candidate of EH. The GenBank accession numbers of human leukotriene A<sub>4</sub> hydrolase and *MX\_5137* are P09960 and Q1D232, respectively. (d) Candidate of cyclooxygenase (COX). The GenBank accession numbers of human COX and *MX\_5217* are P35354 and Q1D1V4, respectively. (e) Candidate of TXA synthase. The GenBank accession numbers of human thromboxane A synthase, *MX\_0683*, and *MX\_2304* are P24557, Q1DEH2, and Q1D9Z9, respectively. (f) Candidate of PGD synthase. The GenBank accession numbers of PDG synthases as follows; Human PGD synthase *MX\_3623* are O60760 and Q1D6B3, respectively. The boxes are shown conserved major residues in enzymes. Red color means metal binding residues, yellow color means positional residues, orange color means stereo residues, green color means substrate binding residues, and blue color means active site residues.



**a**

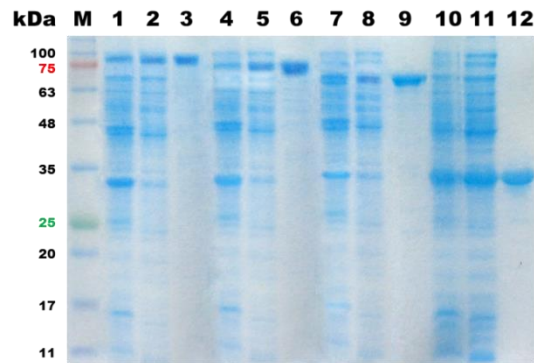

**b**

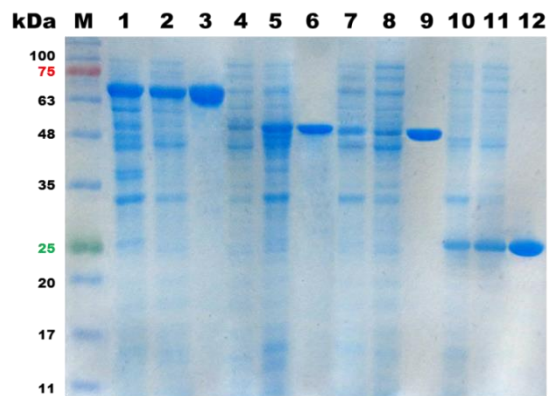

**Supplementary Figure 4. SDS-PAGE analysis of enzymes in *Myxococcus xanthus*.**

**(a)** Expression of the candidate biosynthetic enzymes 2 LOXs (*MXAN\_1745* and *MXAN\_1744*), 1 COX (*MXAN\_5217*), and 1 EH (*MXAN\_1644*) in *M. xanthus*. M; marker, lane 1; *MXAN\_1745* pellet, 2; *MXAN\_1745* crude, 3; *MXAN\_1745* purified enzyme, 4; *MXAN\_1744* pellet, 5; *MXAN\_1744* crude, 6; *MXAN\_1744* purified enzyme, 7; *MXAN\_5217* pellet, 8; *MXAN\_5217* crude, 9; *MXAN\_5217* purified enzyme, 10; *MXAN\_1644* pellet, 11; *MXAN\_1644* crude, 12; *MXAN\_1644* purified enzyme. **(b)** Expression of the candidate biosynthetic enzymes 1 EH (*MXAN\_5137*), 2 thromboxane synthase (*MXAN\_0683*, *MXAN\_2304*), and 1 PGD synthase (*MXAN\_3623*) in *M. xanthus*. M; marker, lane 1; *MXAN\_5137* pellet, 2; *MXAN\_5137* crude, 3; *MXAN\_5137* purified enzyme, 4; *MXAN\_0683* pellet, 5; *MXAN\_0683* crude, 6; *MXAN\_0683* purified enzyme, 7; *MXAN\_2304* pellet, 8; *MXAN\_2304* crude, 9; *MXAN\_2304* purified enzyme, 10; *MXAN\_3623* pellet, 11; *MXAN\_3623* crude, 12; *MXAN\_3623* purified enzyme.

**a**

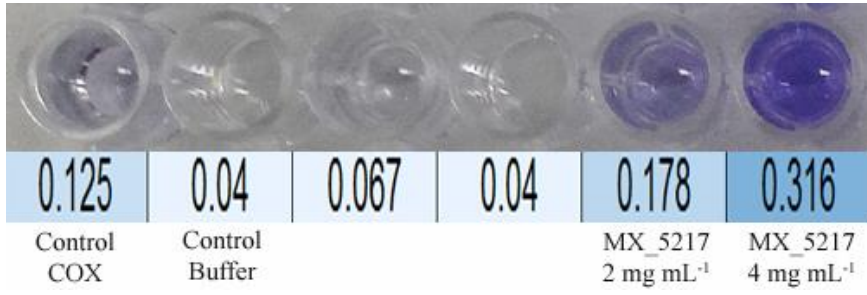

**b**

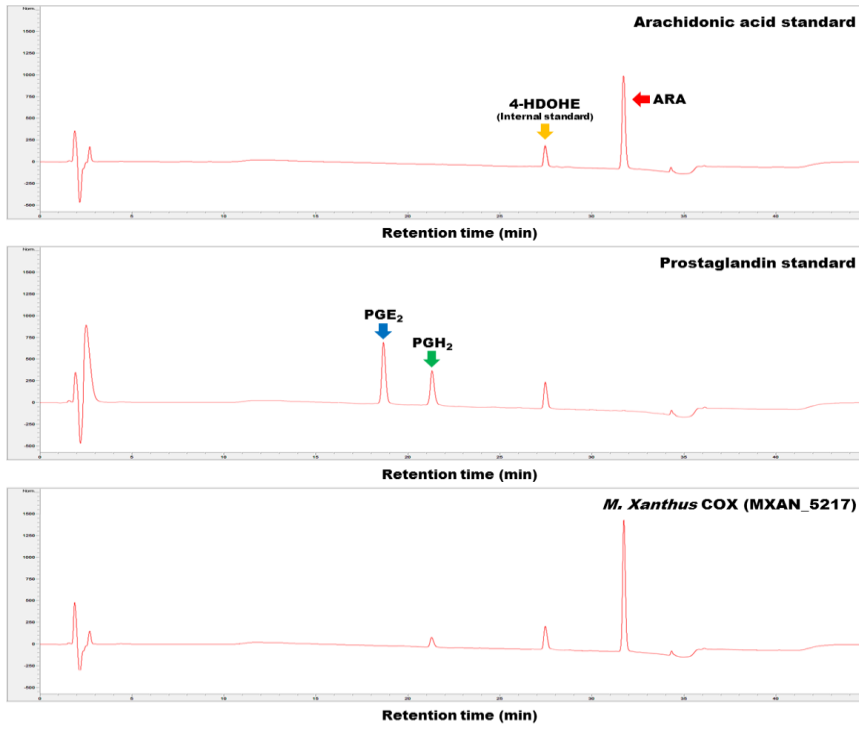

**c**

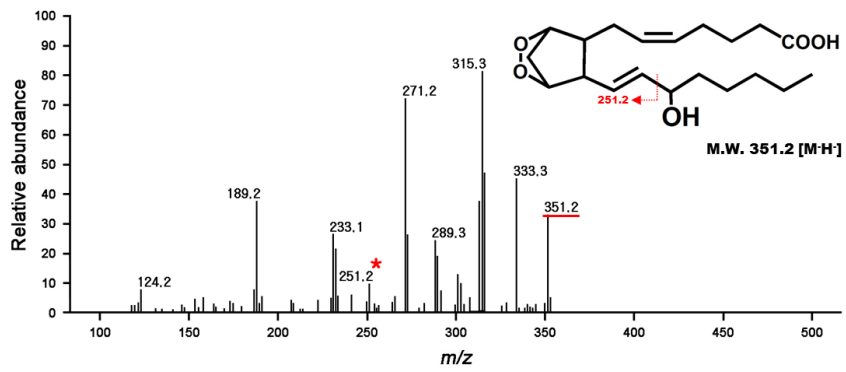

**Supplementary Figure 5. Activity and identification of a metabolite produced from arachidonic acid by cyclooxygenase from *Myxococcus xanthus*.** The determination using HPLC and MS/MS analyse. **(a)** Activity of COX from *M. xanthus*. COX (*MXAN\_5217*) activity was measured using a COX activity assay kit. **(b)** HPLC analysis for a metabolite produced from ARA by COX from *M. xanthus* with the standards PGE<sub>2</sub> and PGH<sub>2</sub>. **(c)** MS/MS analysis for PGH<sub>2</sub> produced from ARA by COX from *M. xanthus*. The metabolite was identified as PGH<sub>2</sub>. The red asterisks and the number with red underline indicates molecular masses of key fragments and total molecular mass of the compound, respectively.

**a**

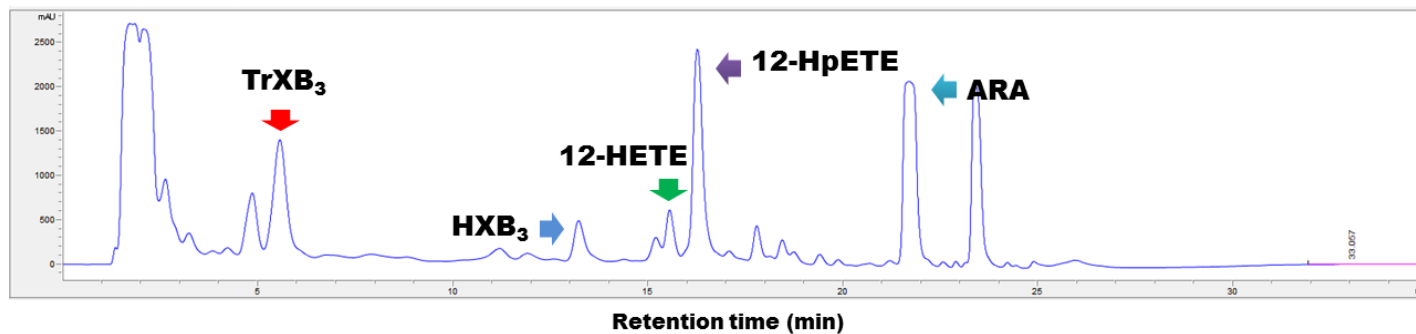

**b**

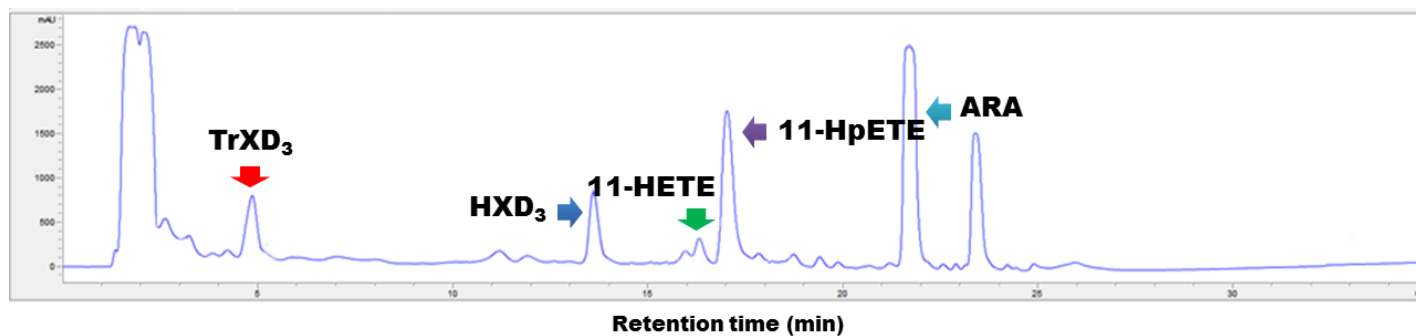

**Supplementary Figure 6. HPLC analysis of metabolites from recombinant *Escherichia coli*.** The metabolites produced from (ARA) by the cultivation of recombinant *E. coli* expressing 12-LOX or 11-LOX and epoxide hydrolase (EH) from *M. xanthus*. **(a)** Metabolites produced by cells expressing 12-LOX and EH. **(b)** Metabolites produced by cells expressing 11-LOX and EH. The reactions were performed at 30°C in 50 mM EPPS (pH 8.5) containing 1 mM ARA and 7.2 g L<sup>-1</sup> recombinant cells for 120 min.

**a**

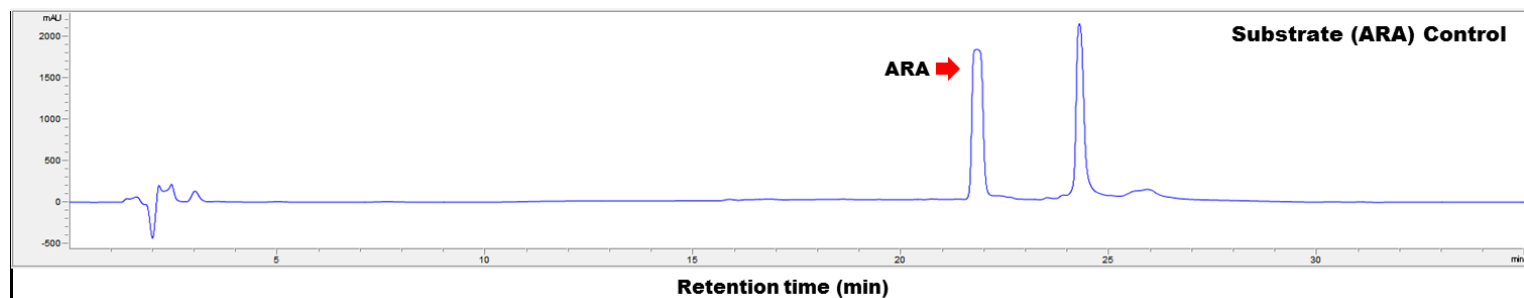

**b**

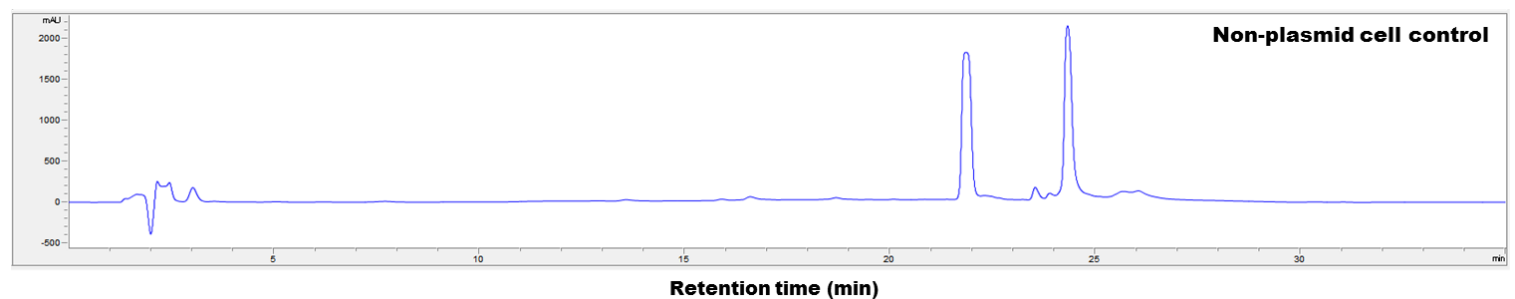

**Supplementary Figure 7. Determination of non-enzymatic products by *Escherichia coli* without plasmid.** (a) HPLC analysis after incubation of only ARA for 120 min. The reaction was performed at 30°C in 50 mM EPPS (pH 8.5) containing 1 mM ARA for 120 min. (b) HPLC analysis after incubation of *E. coli* without plasmid containing ARA for 120 min. The reaction was performed at 30°C in 50 mM EPPS (pH 8.5) containing 1 mM ARA and 7.2 g L<sup>-1</sup> cells for 120 min.

**a**

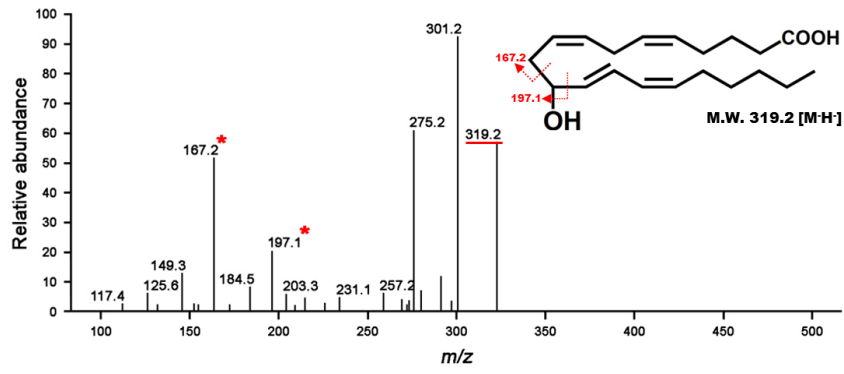

**11-HETE**

**b**

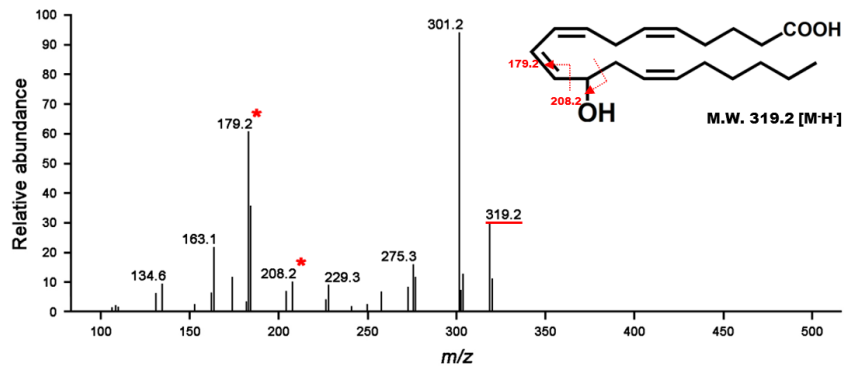

**12-HETE**

**c**

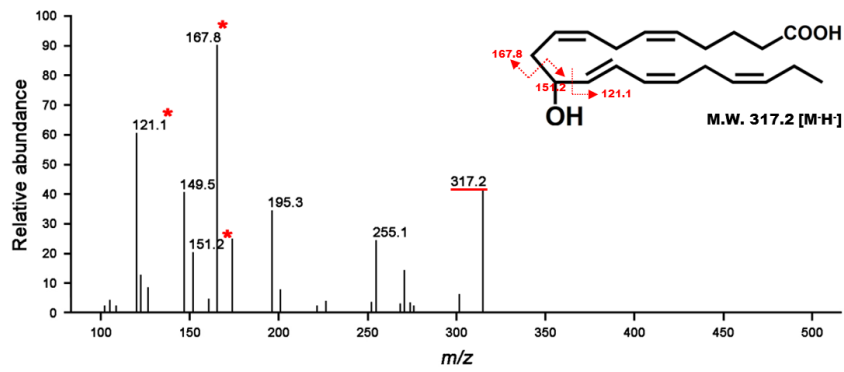

**11-HEPE**

**d**

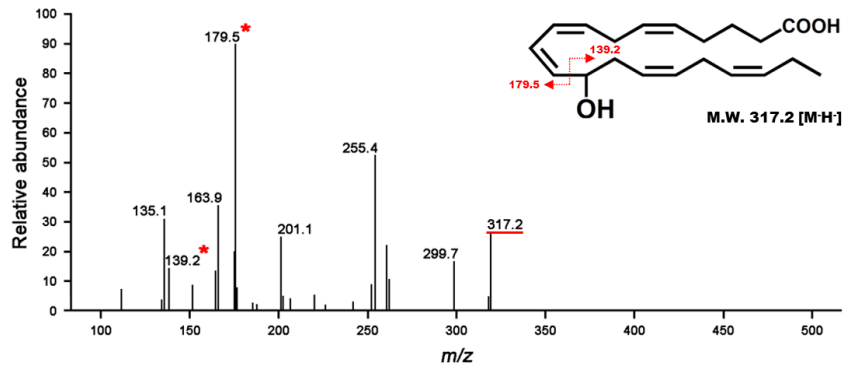

**12-HEPE**

**e**

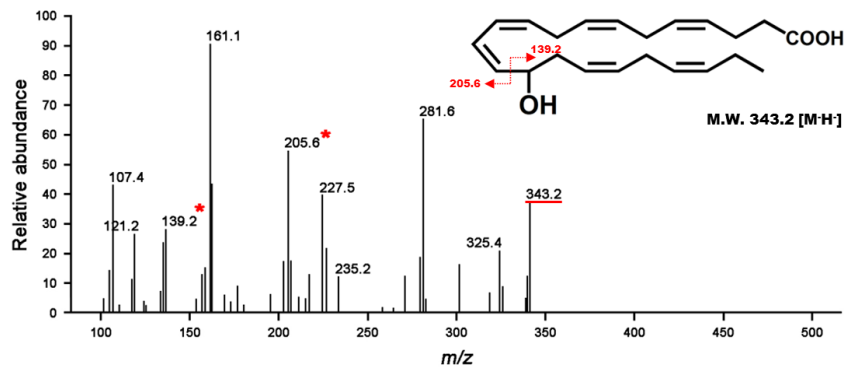

**14-HDoHE**

**Supplementary Figure 8. LC-MS/MS analysis of hydroxy fatty acids.** The hydroxy fatty acids (HFAs) were produced from polyunsaturated fatty acids (PUFAs) by 12-LOX or 11-LOX from *M. xanthus*. **(a)** 11-Hydroxyeicosatetraenoic acid (11-HETE). **(b)** 12-HETE. **(c)** 11-Hydroxyeicosapentaenoic acid (11-HEPE). **(d)** 12-HEPE. **(e)** 14-Hydroxydocosahexaenoic acid (14-HDoHE). The red asterisks and the number with read underline indicates molecular masses of key fragments and total molecular mass of the compound, respectively.

**a**

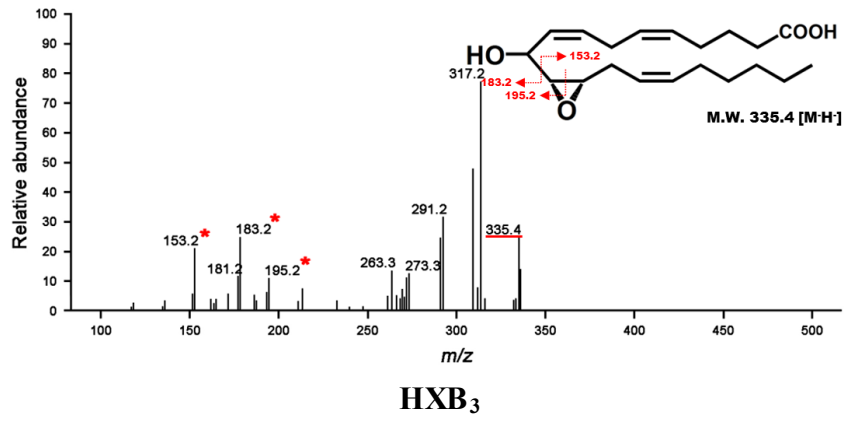

**b**

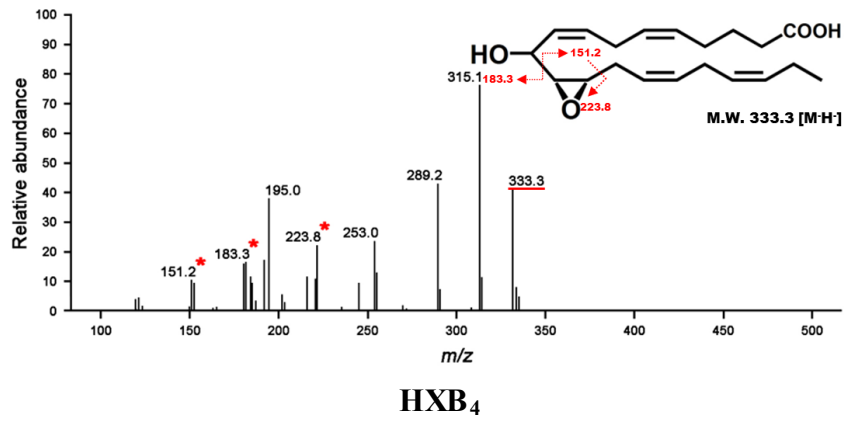

**c**

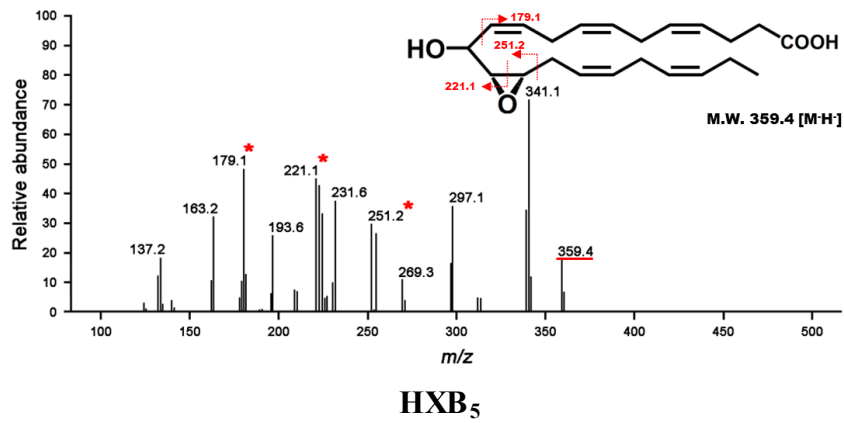



d

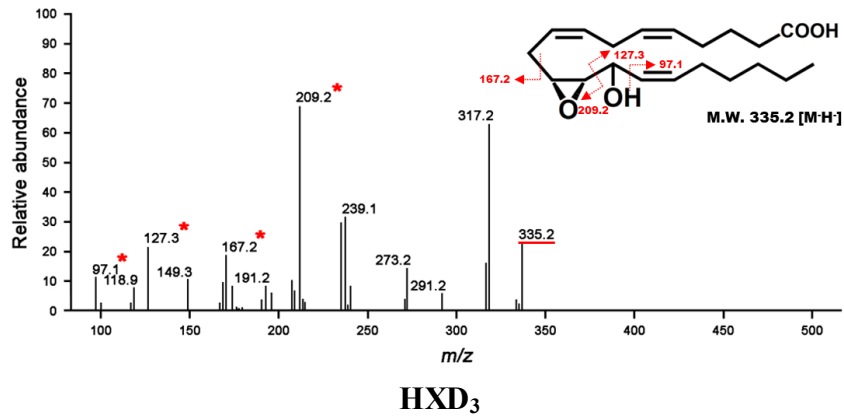

e

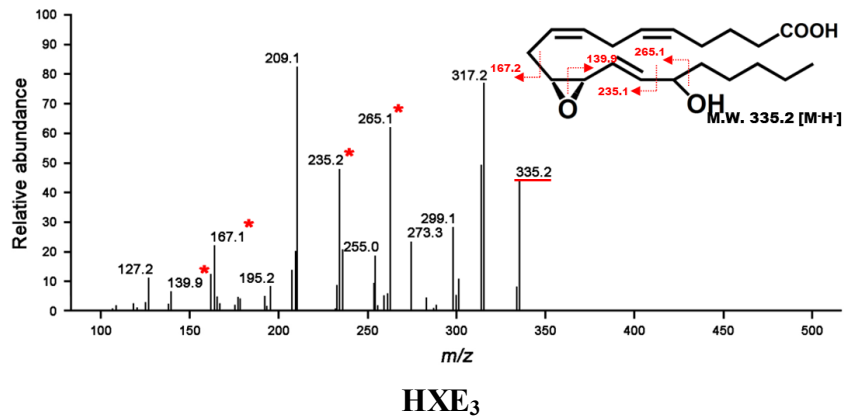

**Supplementary Figure 9. LC-MS/MS analysis of hepoxilins.** Hepoxilins (HXs) were produced from PUFAs by 12-LOX or 11-LOX from *M. xanthus*. (a) HXB<sub>3</sub>. (b) HXB<sub>4</sub>. (c) HXB<sub>5</sub>. (d) HXD<sub>3</sub>. (e) HXE<sub>3</sub>. The red asterisks and the number with read underline indicates molecular masses of key fragments and total molecular mass of the compound, respectively.

**a**

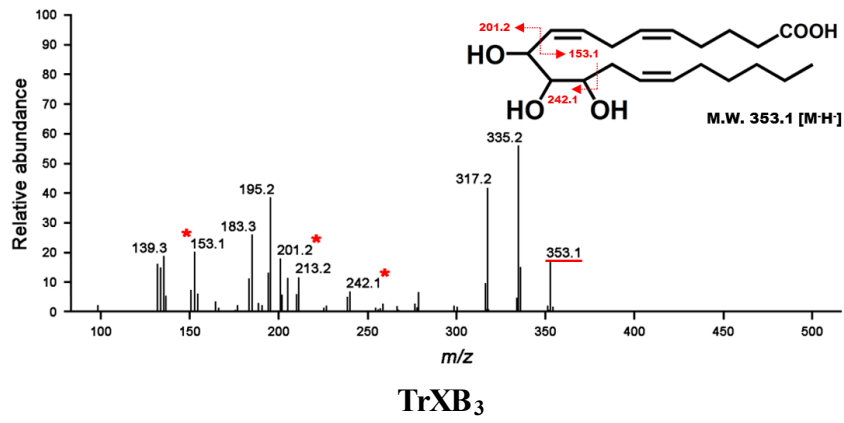

**b**

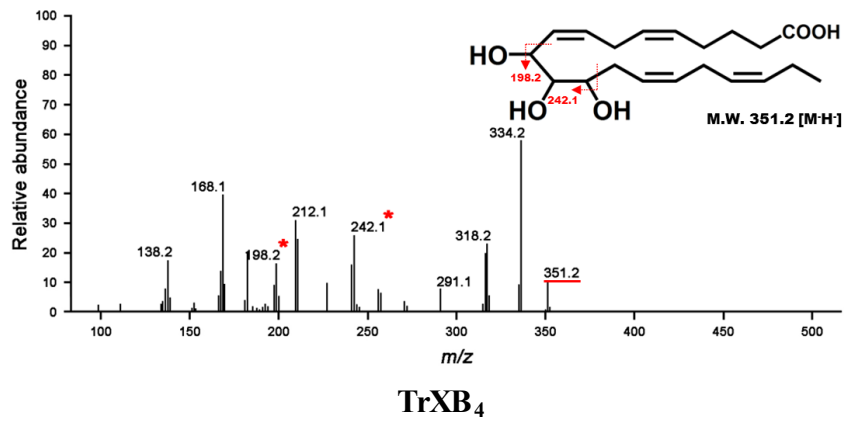

**c**

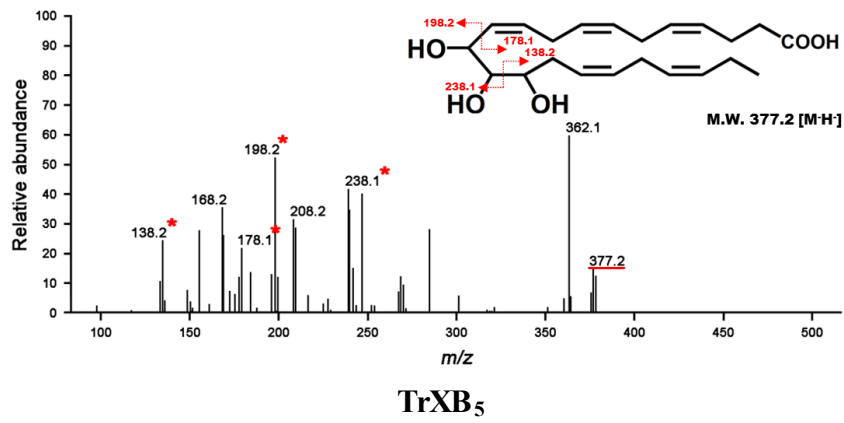

d

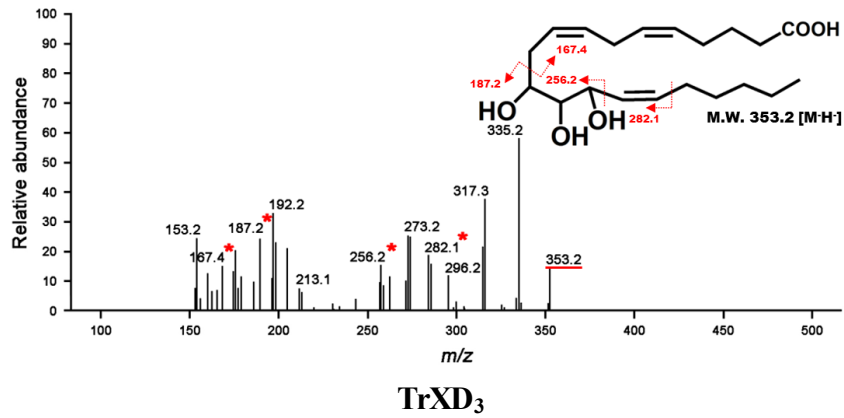

e

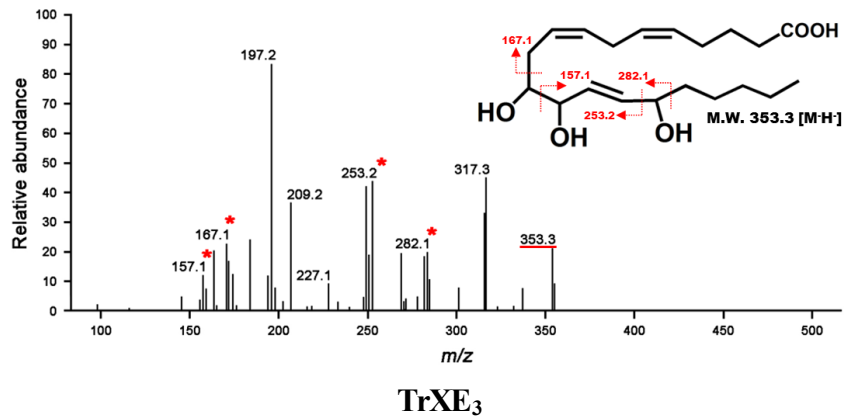

**Supplementary Figure 10. LC-MS/MS analysis of trioxilins.** Trioxilins (TrXs) were produced from PUFAs by 12-LOX or 11-LOX and (EH) from *M. xanthus*. **(a)** TrXB<sub>3</sub>. **(b)** TrXB<sub>4</sub>. **(c)** TrXB<sub>5</sub>. **(d)** TrXD<sub>3</sub>. **(e)** TrXE<sub>3</sub>. The red asterisks and the number with read underline indicates molecular masses of key fragments and total molecular mass of the compound, respectively.

**a**

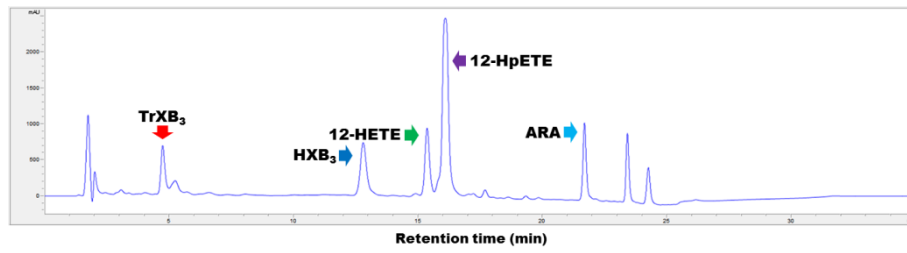

**b**

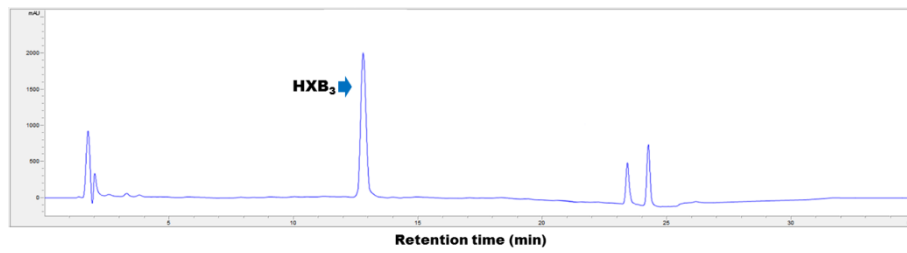

**c**

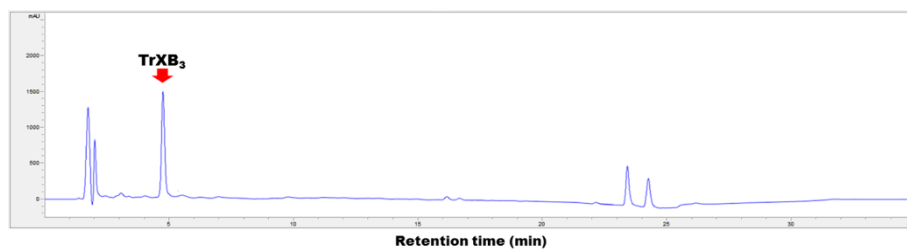

**Supplementary Figure 11. Purification of hepxilin B<sub>3</sub> and trioxilin B<sub>3</sub> using Prep-LC. (a)** Reaction products from ARA by cells expressing 12-LOX and EH from *M. xanthus*. **(b)** Purified hepxilin B<sub>3</sub> (HXB<sub>3</sub>). **(c)** Purified trioxilin B<sub>3</sub> (TrXB<sub>3</sub>).

**a**

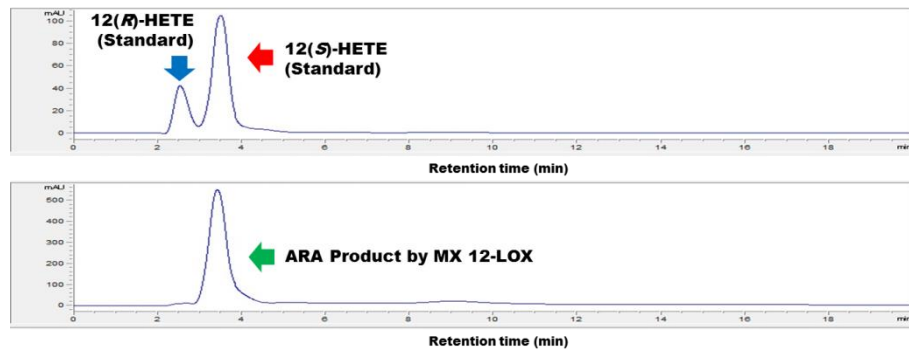

**b**

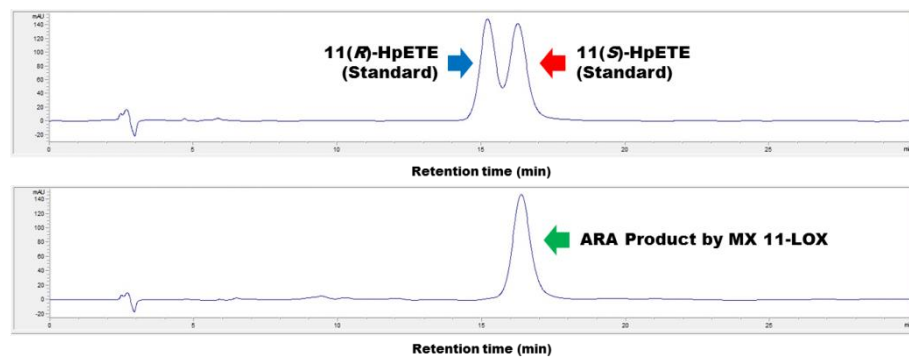

**Supplementary Figure 12. Stereospecificity of metabolites of recombinant *Escherichia coli*.** The reactions were performed with ARA. **(a)** The product of 12-LOX from *M. xanthus* was identified as 12*S*-HETE by comparing with the standards 12*S*-HETE and 12*R*-HETE. **(b)** The product of 11-LOX from *M. xanthus* was identified as 11*S*-HETE by comparing with the standards 11*S*-HETE and 11*R*-HETE.

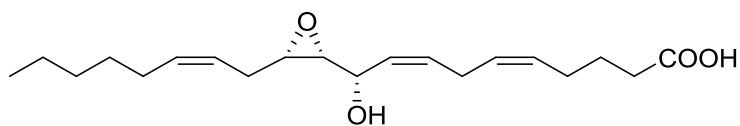

(S,5Z,8Z)-10-hydroxy-10-((2R,3S)-3-((Z)-oct-2-en-1-yl)oxiran-2-yl)deca-5,8-dienoic acid

**Supplementary Figure 13. Structure of hepoxilin B<sub>3</sub>.**

**a**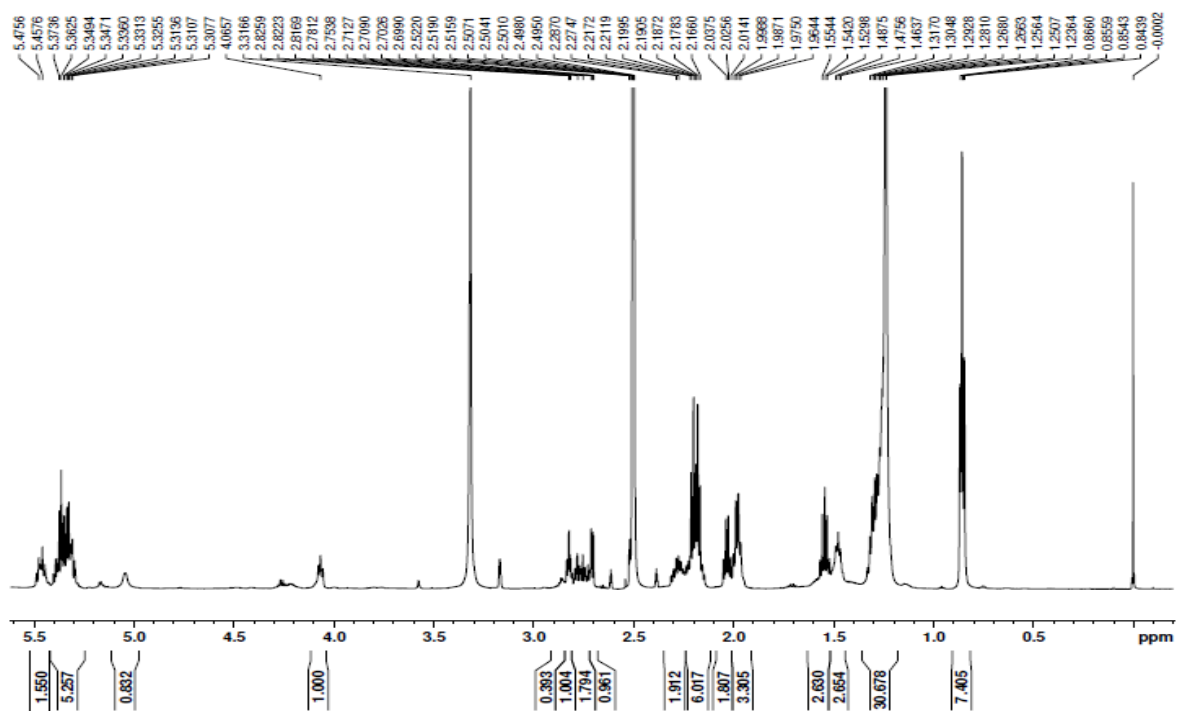**b**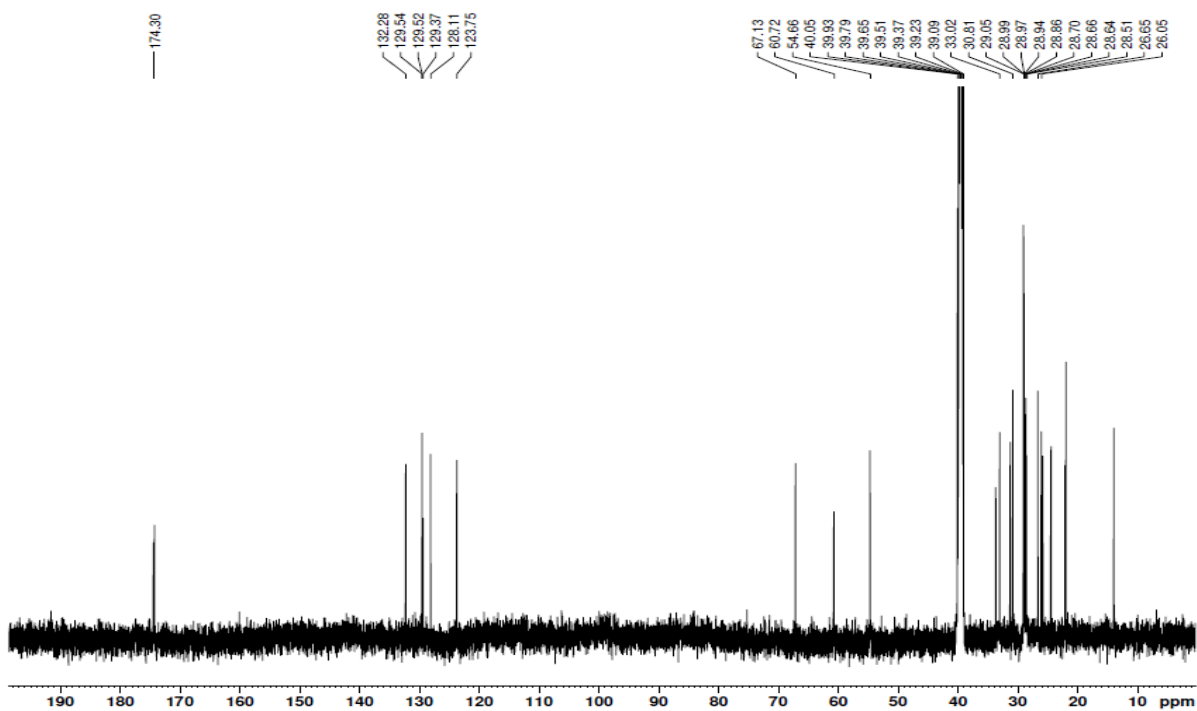

Supplementary Figure 14. 1D NMR data of heptoxilin B<sub>3</sub>. (a) 1H NMR peak of heptoxilin B<sub>3</sub> (HXB<sub>3</sub>). (b) 13C NMR peak of HXB<sub>3</sub>.

**a**

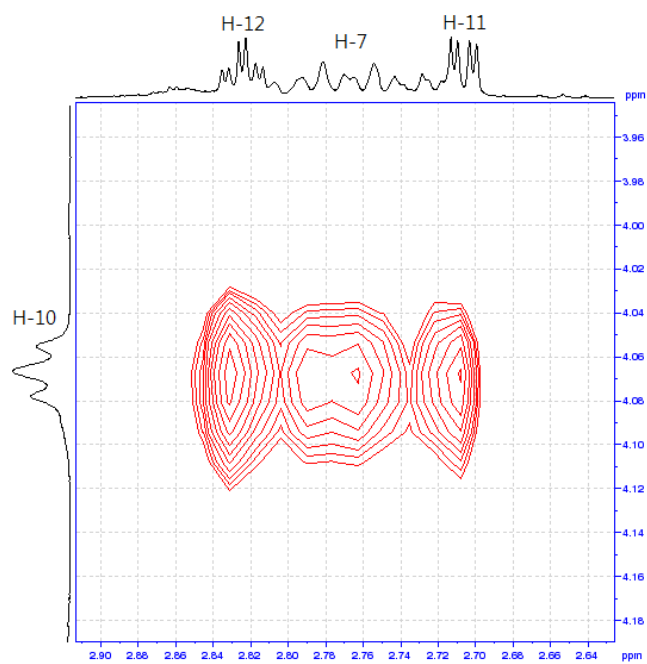

**b**

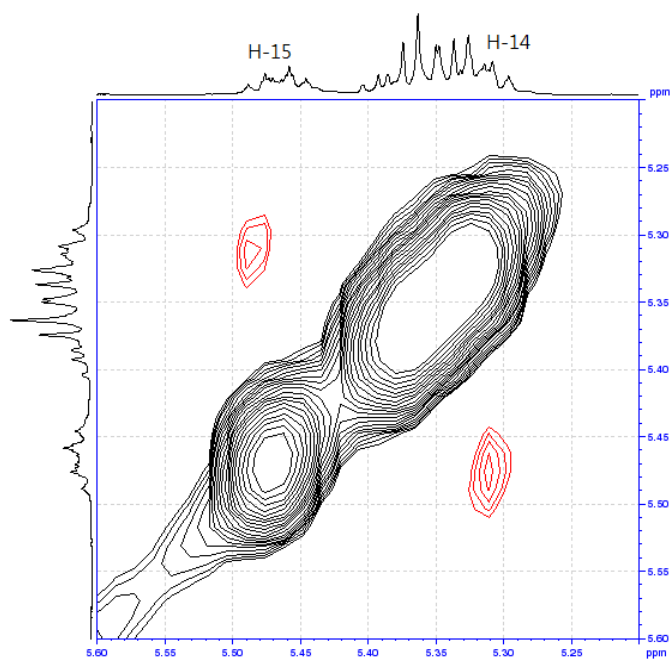

**Supplementary Figure 15. ROESY NMR of hepoxilin B<sub>3</sub>.** (a) ROE correlation of H-10, H-11, and H-12 of HXB<sub>3</sub> at ROESY. (b) ROE correlation of H-14 and H-15 of HXB<sub>3</sub> at ROESY.



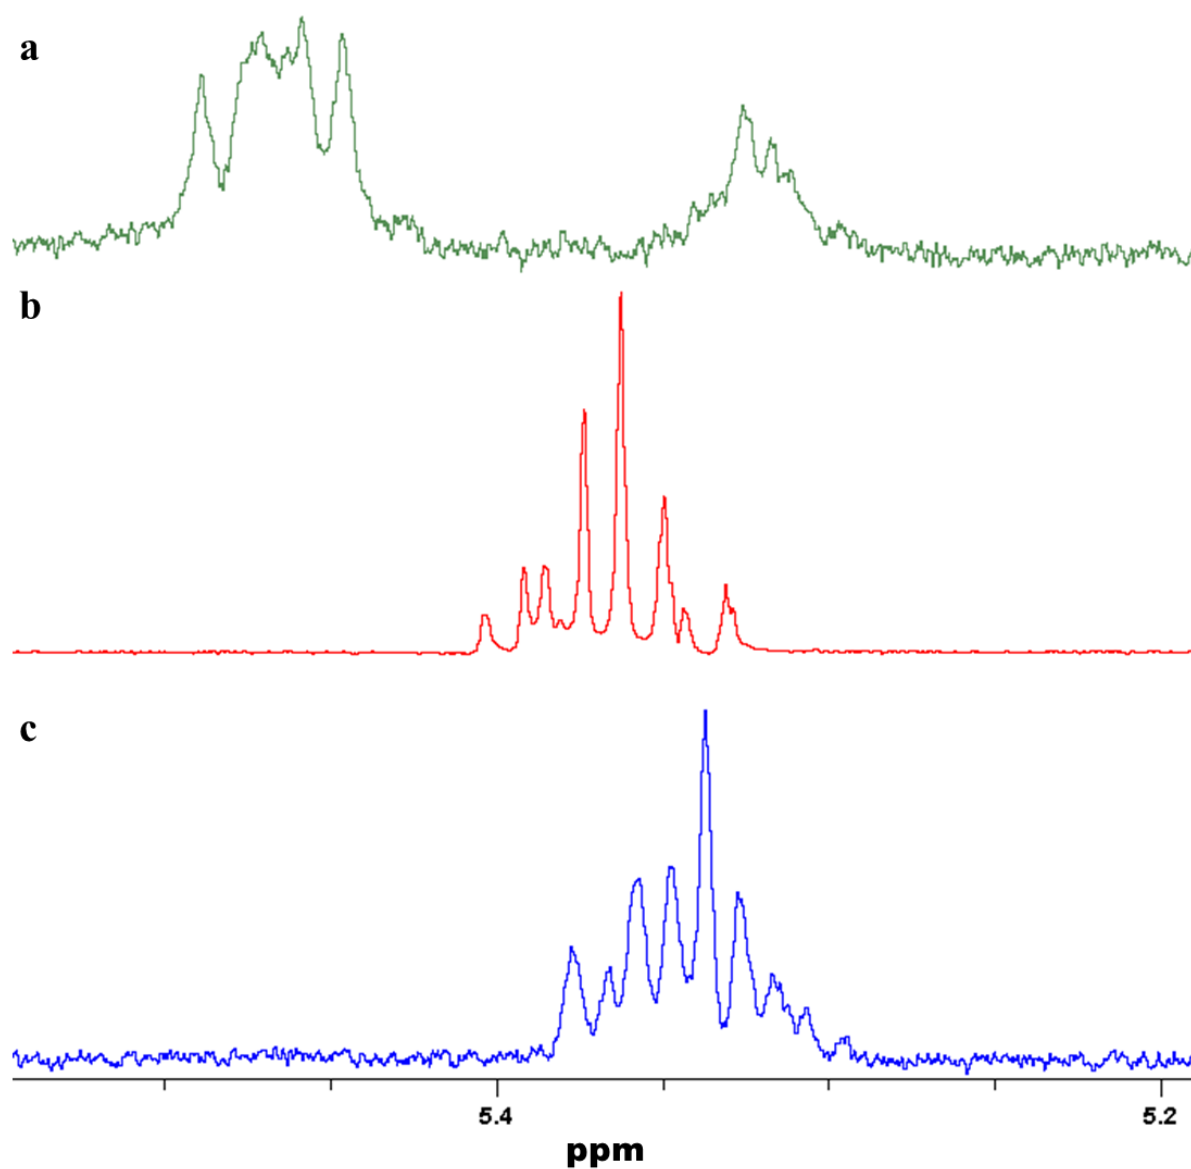

**Supplementary Figure 16. H-5, H-6, H-8, H-9, H-14, and H-15 of hepoxinin B<sub>3</sub>.** The peaks were confirmed with the selective TOCSY (mixing time = 40 ms). **(a)** H-15,14 irradiation on H-17. **(b)** H-9,8 irradiation on H-10. **(c)** H-5,6 irradiation on H-3.

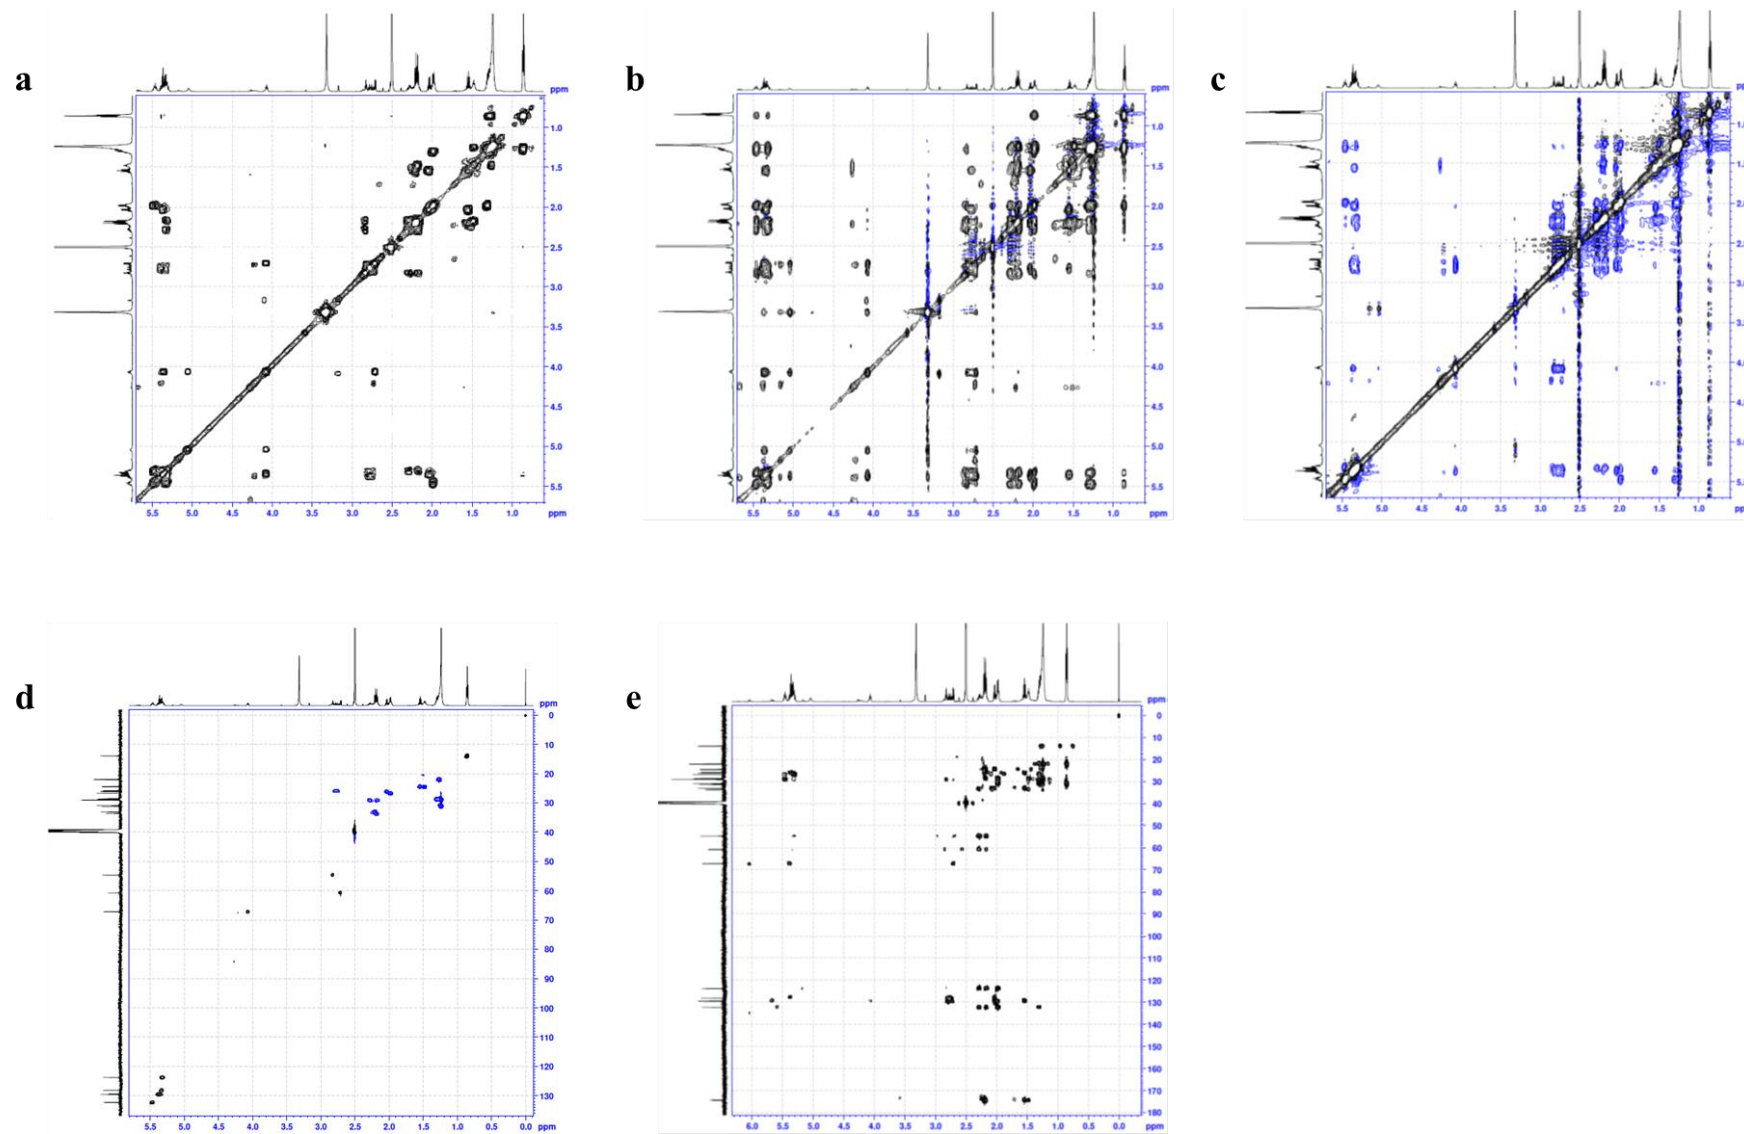

Supplementary Figure 17. 2D NMR of hepoxilin B<sub>3</sub>. (a) COSY. (b) TOCSY. (c) ROESY. (d) HSQC. (e) HMBC.

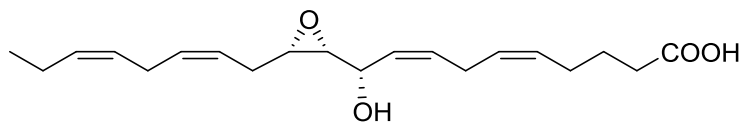

(*S*,5*Z*,8*Z*)-10-hydroxy-10-((2*R*,3*S*)-3-((2*Z*,5*Z*)-octa-2,5-dien-1-yl)oxiran-2-yl)deca-5,8-dienoic acid

**Supplementary Figure 18. Structure of hepoxilin B<sub>4</sub>.**

**a**

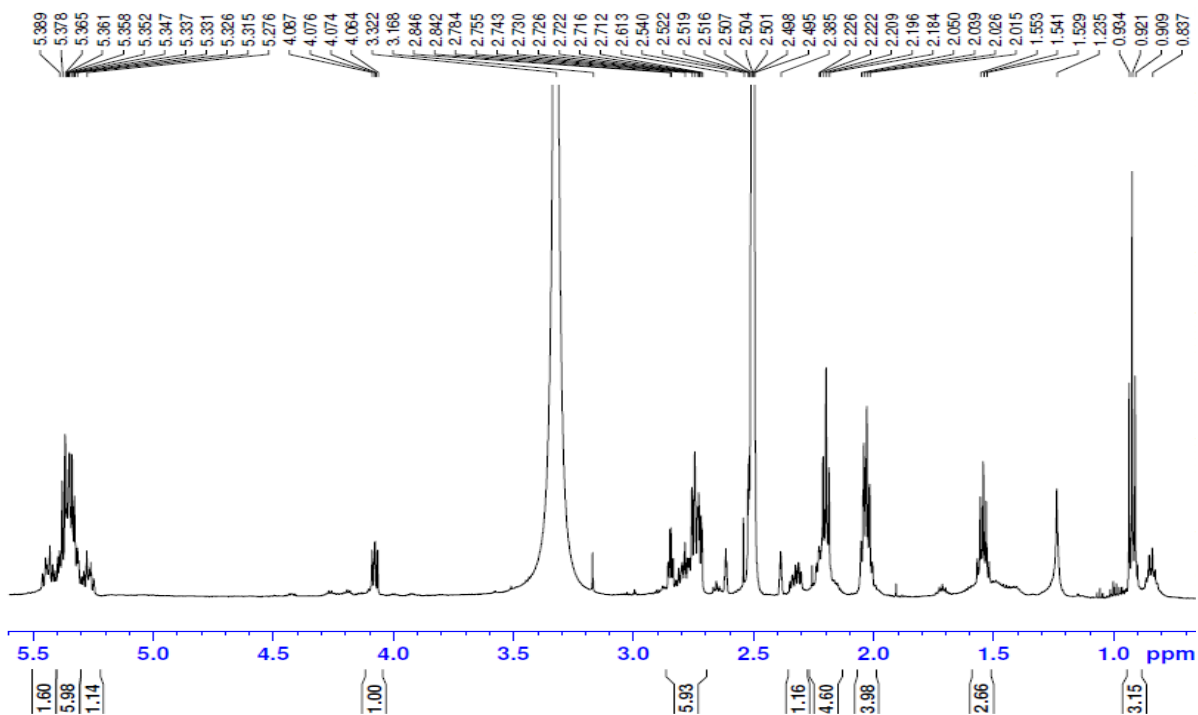

**b**

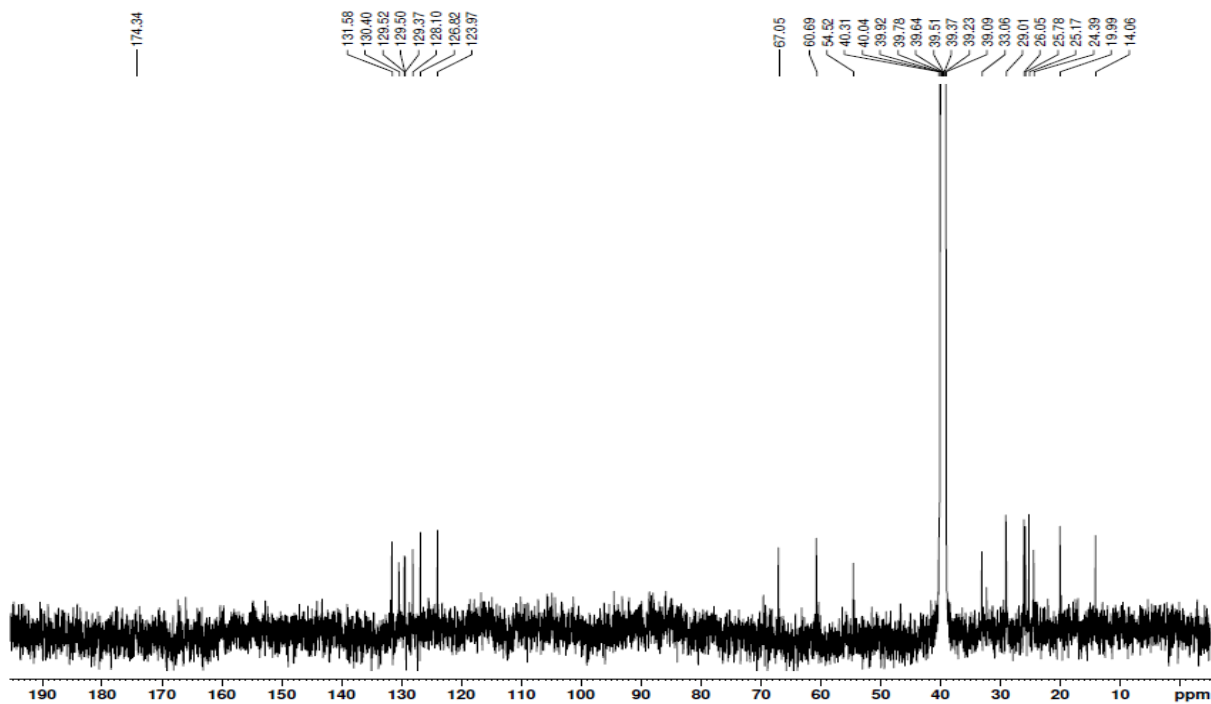

**Supplementary Figure 19. 1D NMR data of hepixilin B<sub>4</sub>. (a) <sup>1</sup>H NMR peak of HXB<sub>4</sub>. (b) <sup>13</sup>C NMR peak of HXB<sub>4</sub>.**

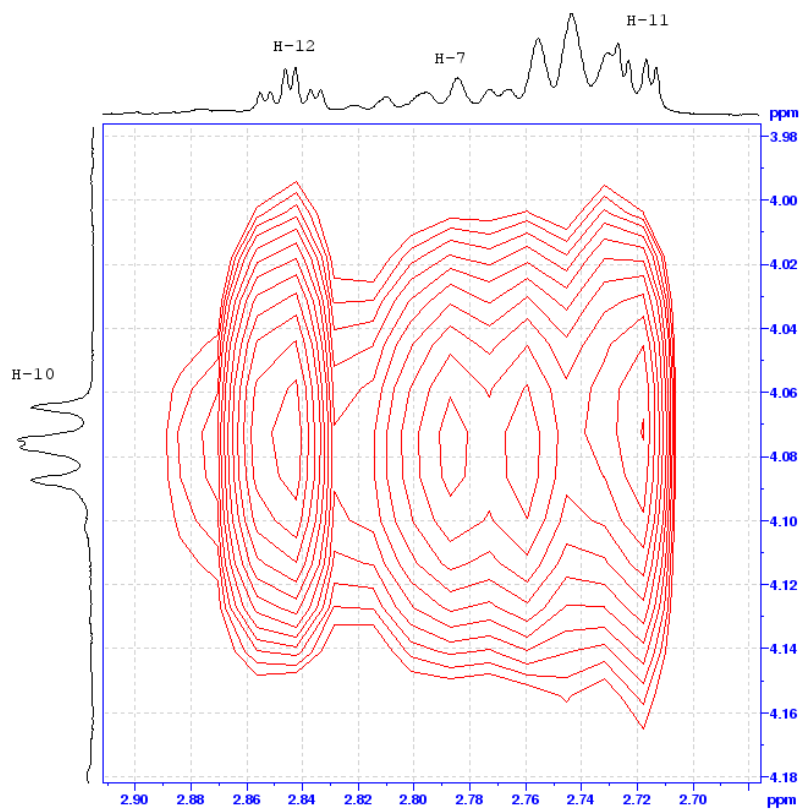

**Supplementary Figure 20. ROESY NMR of hepoxilin B<sub>4</sub>.** ROE correlation of H-10, H-11, and H-12 of HXB<sub>4</sub> at ROESY.

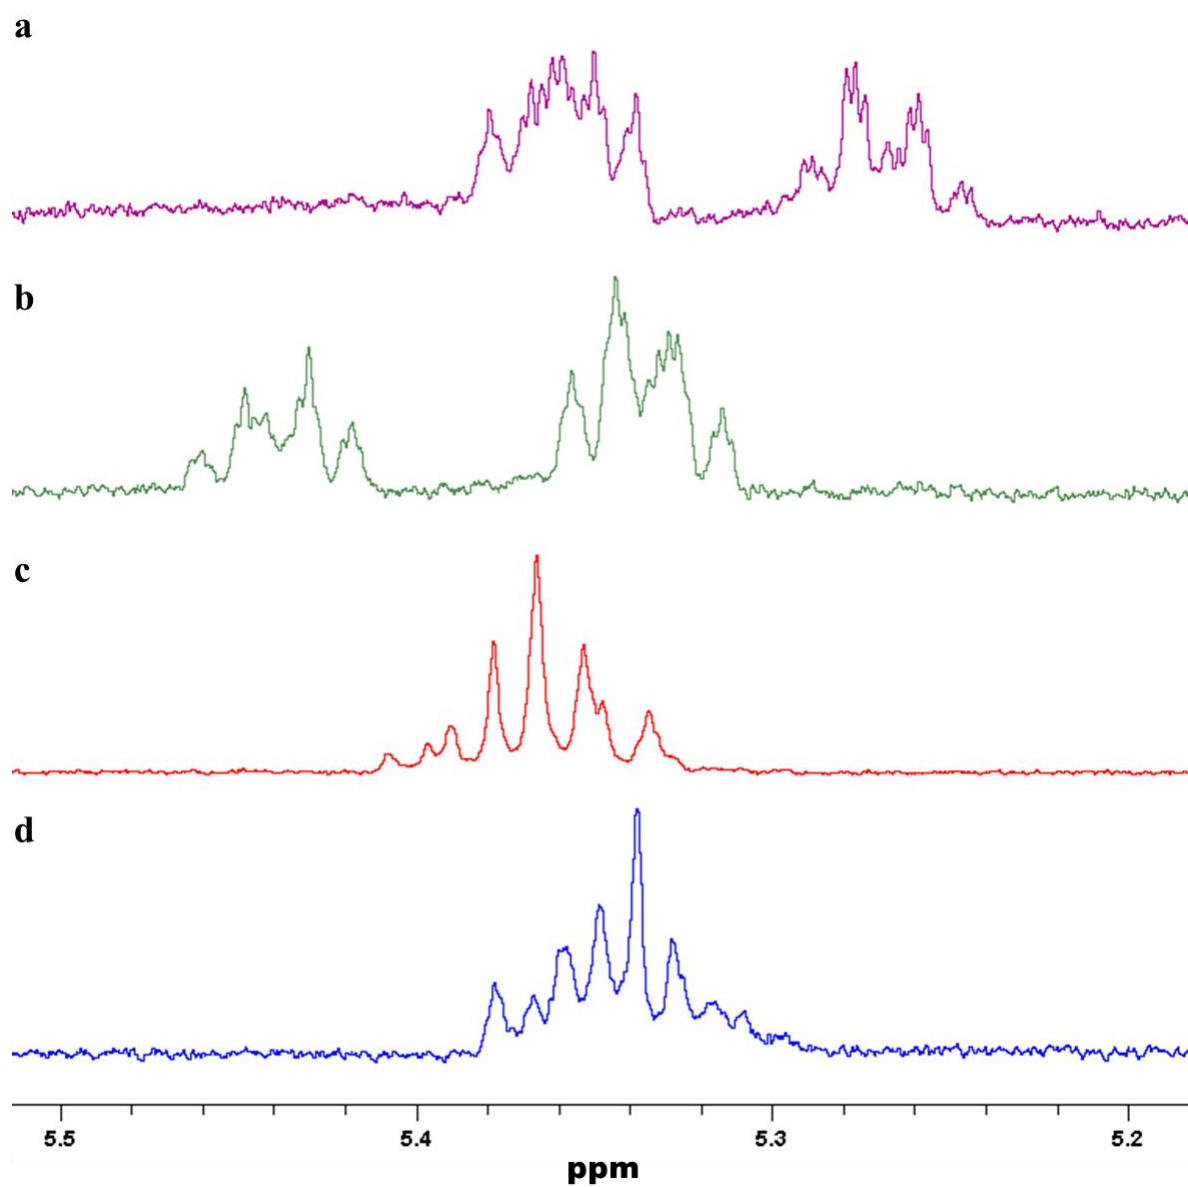

**Supplementary Figure 21. H-5, H-6, H-8, H-9, H-14, H-15, H-17, and H-18 of hepoxilin B<sub>4</sub>.** The peaks were confirmed with the selective TOCSY (mixing time = 80 ms). **(a)** H-18,17 irradiation on H-20. **(b)** H-14,15 irradiation on H-12. **(c)** H-9,8 irradiation on H-10. **(d)** H-5,6 irradiation on H-3.

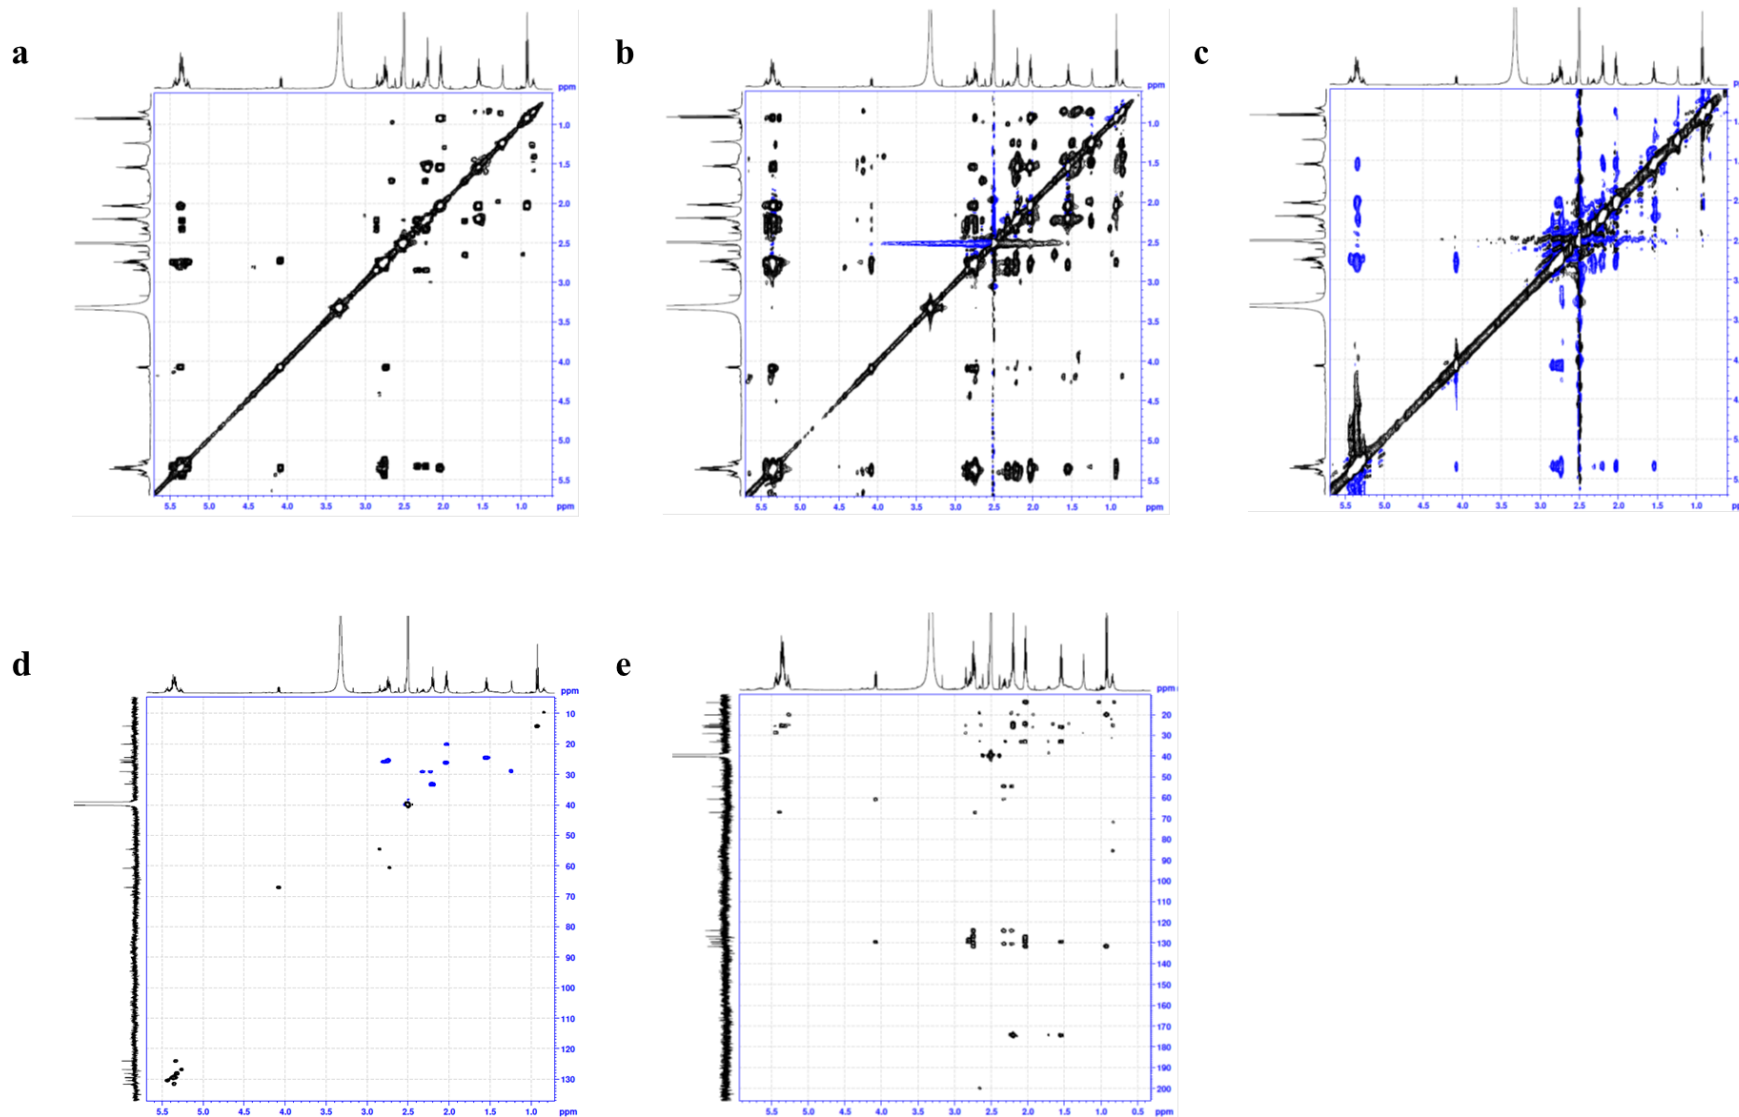

Supplementary Figure 22. 2D NMR of hepoxilin B<sub>4</sub>. (a) COSY. (b) TOCSY. (c) ROESY. (d) HSQC. (e) HMBC.

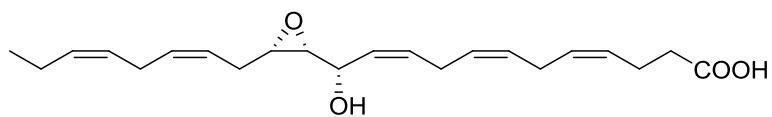

(S,4Z,7Z,10Z)-12-hydroxy-12-((2R,3S)-3-((2Z,5Z)-octa-2,5-dien-1-yl)oxiran-2-yl)dodeca-4,7,10-trienoic acid

**Supplementary Figure 23. Structure of hepoxilin B<sub>5</sub>.**



**a**

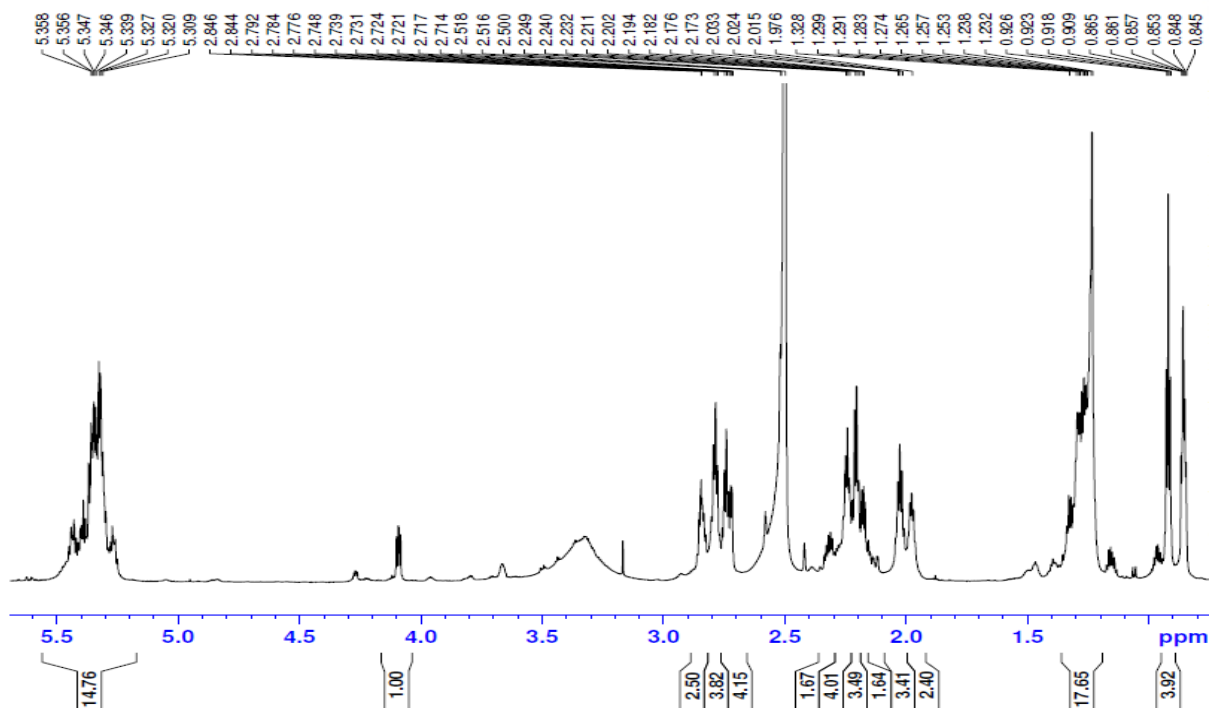

**b**

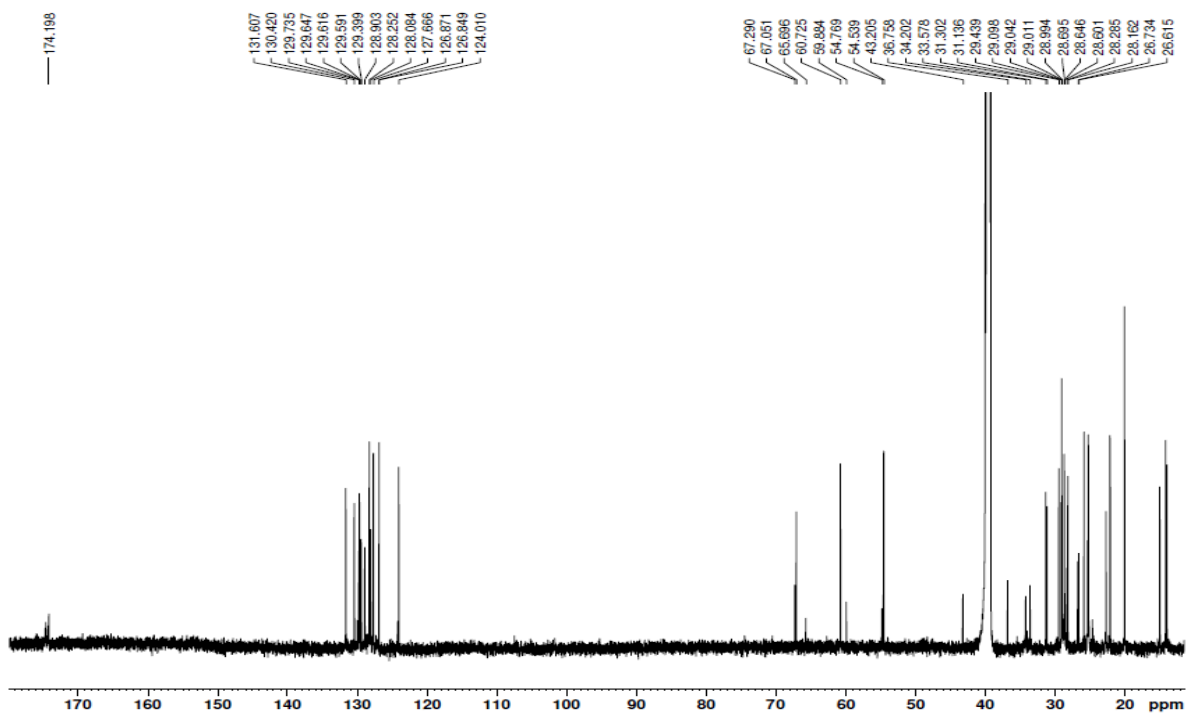

**Supplementary Figure 24. 1D NMR data of hepixilin B<sub>5</sub>. (a) <sup>1</sup>H NMR peak of HXB<sub>5</sub>. (b) <sup>13</sup>C NMR peak of HXB<sub>5</sub>.**

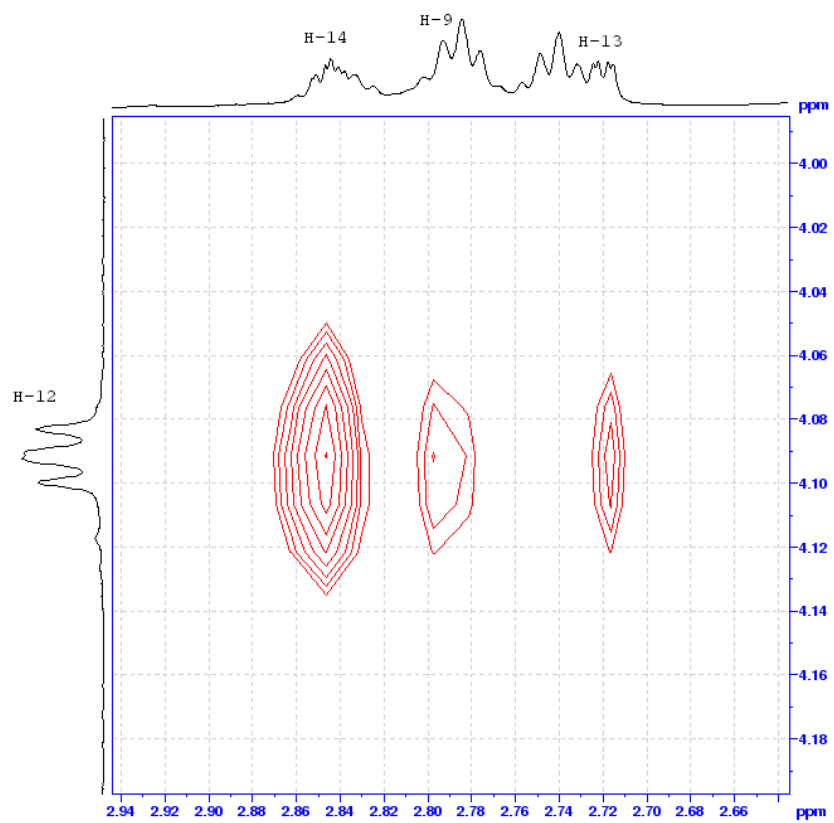

**Supplementary Figure 25. ROESY NMR of heptoxilin B<sub>5</sub>.** ROE correlation of H-10, H-11, and H-12 of HxB<sub>5</sub> at ROESY.

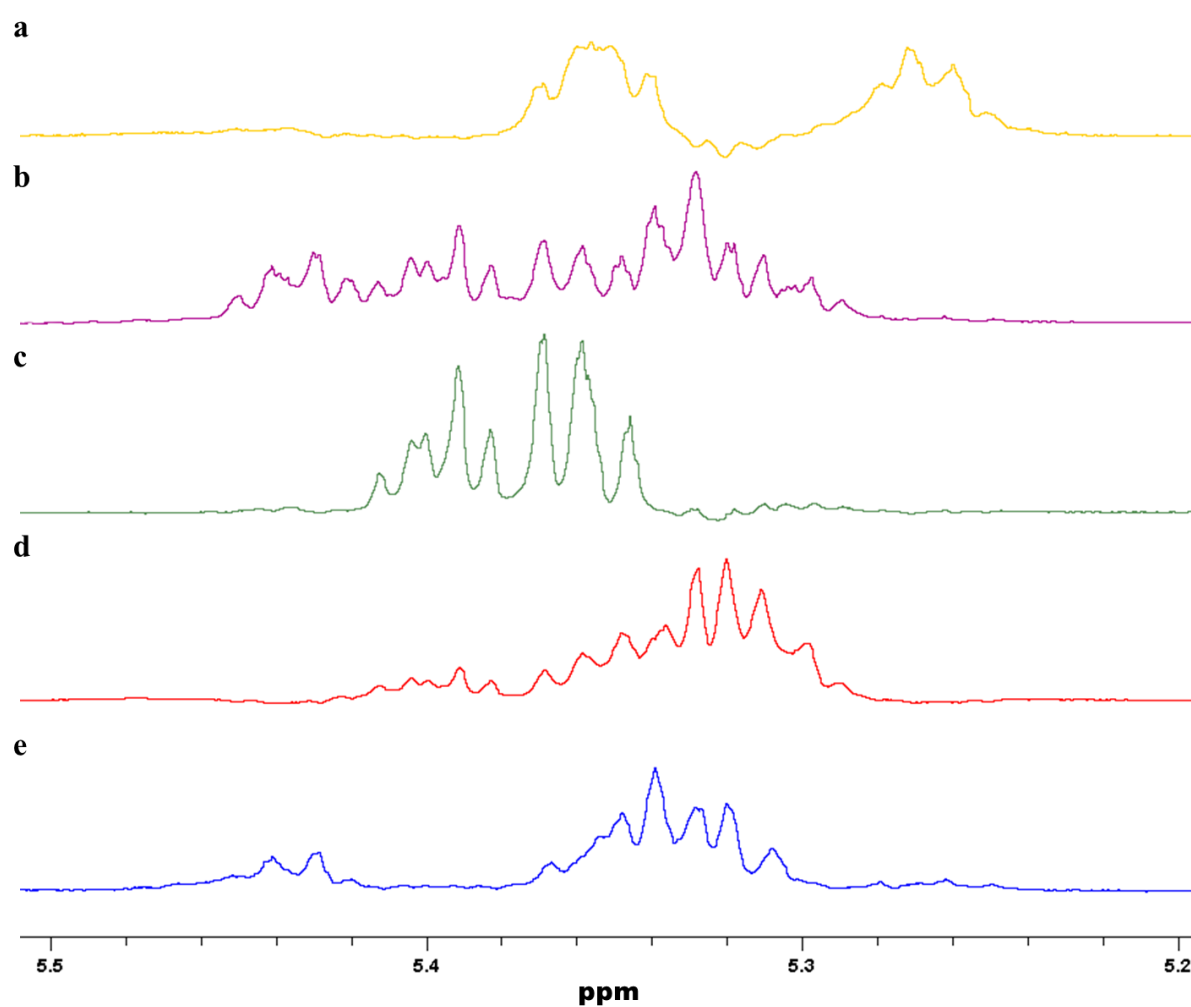

**Supplementary Figure 26. H-4, H-5, H-7, H-8, H-10, H-11, H-17, H-19, and H-20 of hepoxinin B<sub>5</sub>.** The peaks were confirmed with the selective TOCSY (mixing time = 80 ms). (a) H-20,19 irradiation on H-22. (b) H-16,17 irradiation on H-14. (c) H-11,10 irradiation on H-12. (d) H-7,8 irradiation on H-6 and H-9. (e) H-4,5 irradiation on H-2.

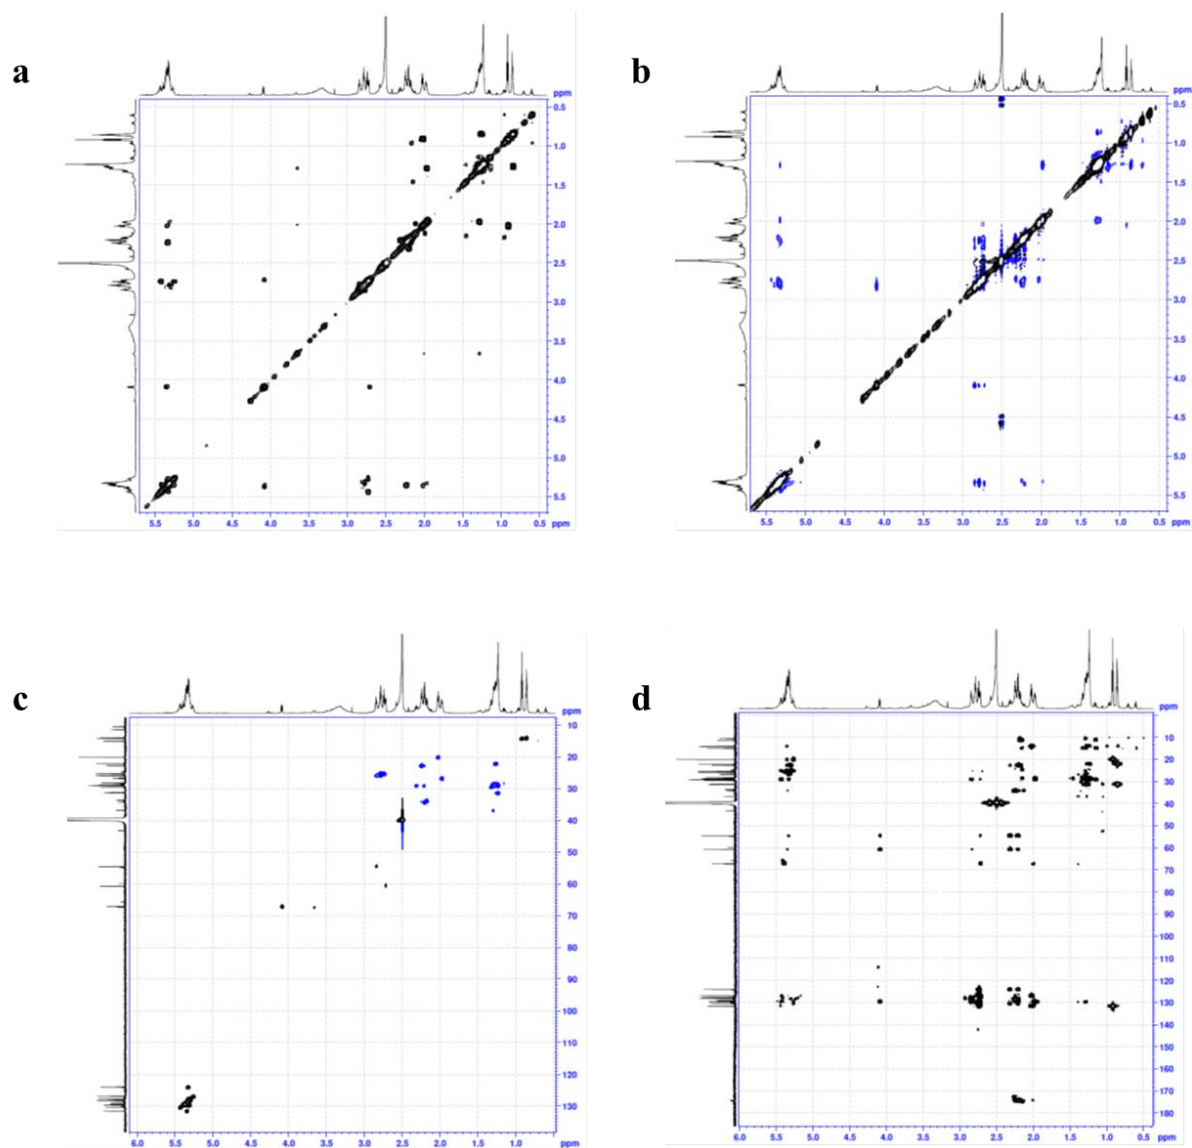

**Supplementary Figure 27. 2D NMR of hepoxilin B<sub>5</sub>. (a) COSY. (b) ROESY. (c) HSQC. (d) HMBC.**

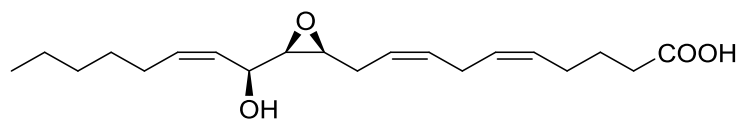

(5Z,8Z)-10-((2S,3R)-3-((S,Z)-1-hydroxyoct-2-en-1-yl)oxiran-2-yl)deca-5,8-dienoic acid

**Supplementary Figure 28. Structure of hepoxilin D<sub>3</sub>.**

**a**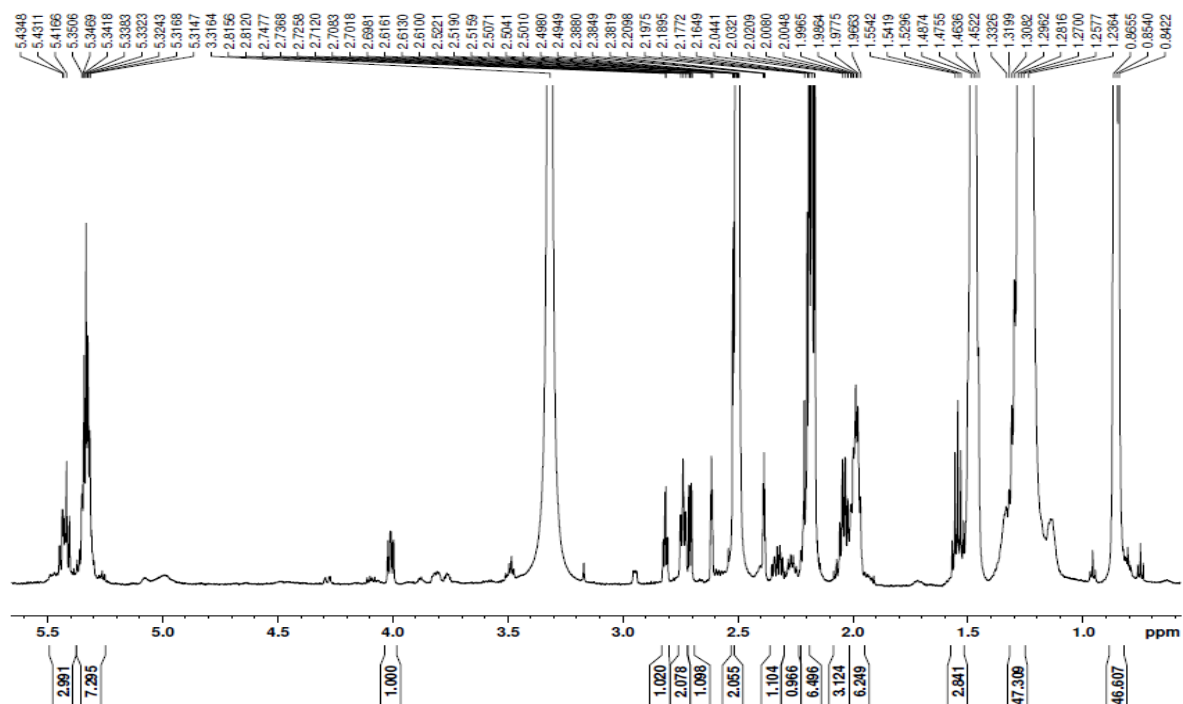**b**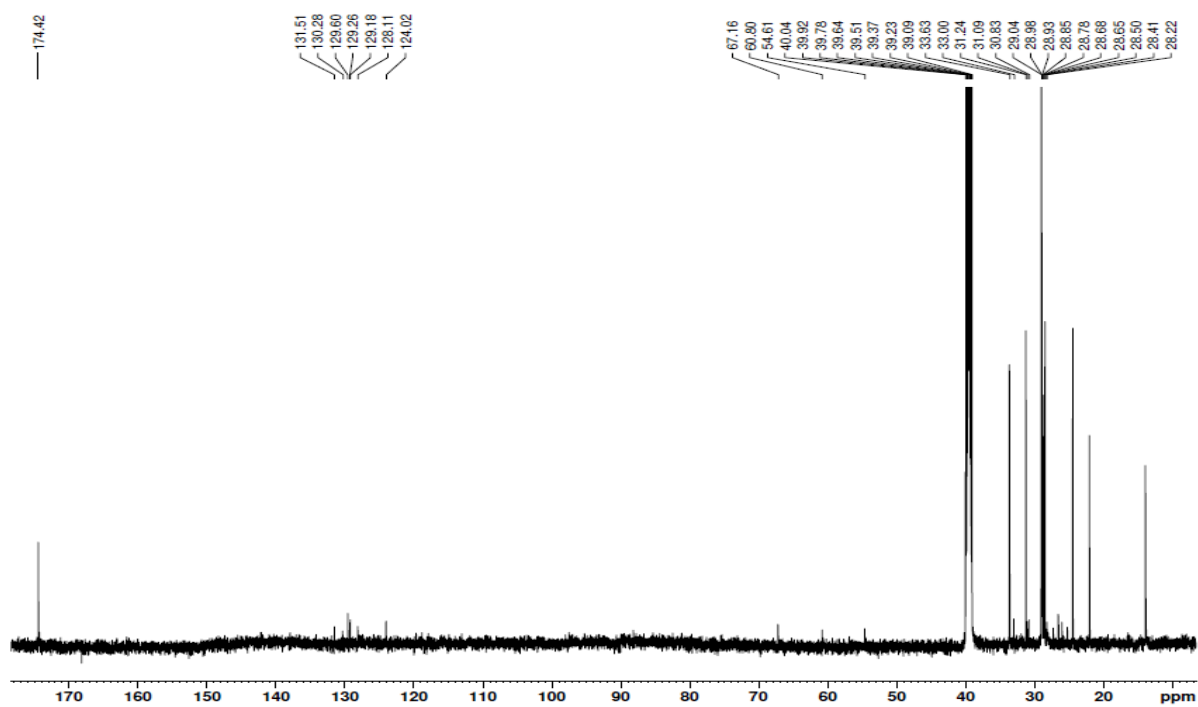

**Supplementary Figure 29. 1D NMR data of hepixilin D<sub>3</sub>. (a) <sup>1</sup>H NMR peak of HXD<sub>3</sub>. (b) <sup>13</sup>C NMR peak of HXD<sub>3</sub>.**

**a**

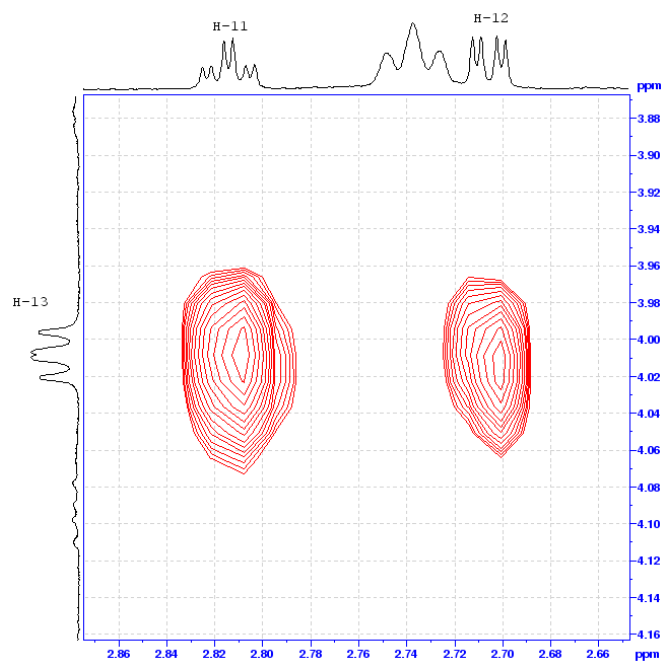

**b**

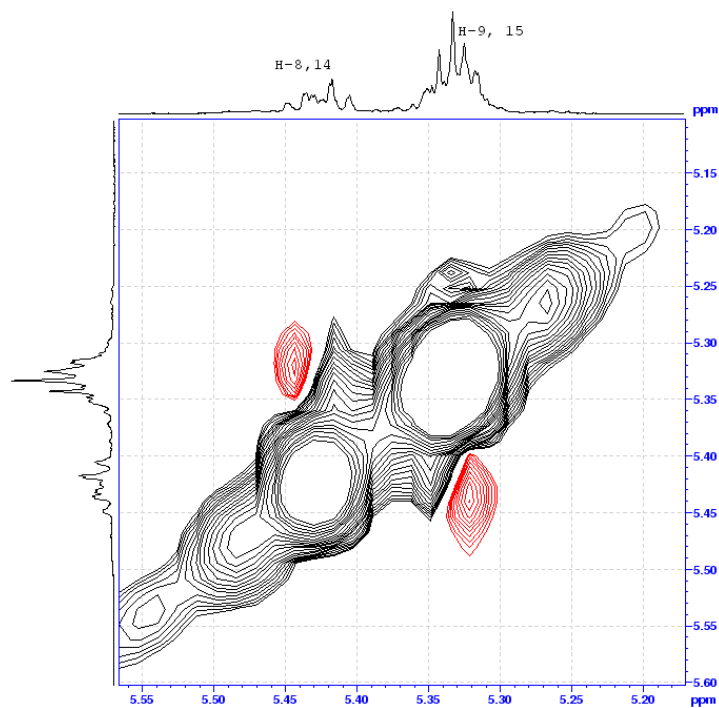

**Supplementary Figure 30. ROESY NMR of hepoxinin D<sub>3</sub>.** (a) ROE correlation of H-11, H-12, and H-13 of HXD<sub>3</sub> at ROESY. (b) ROE correlation between H-14 and H-15 and between H-8 and H-9 of HXD<sub>3</sub> at ROESY.

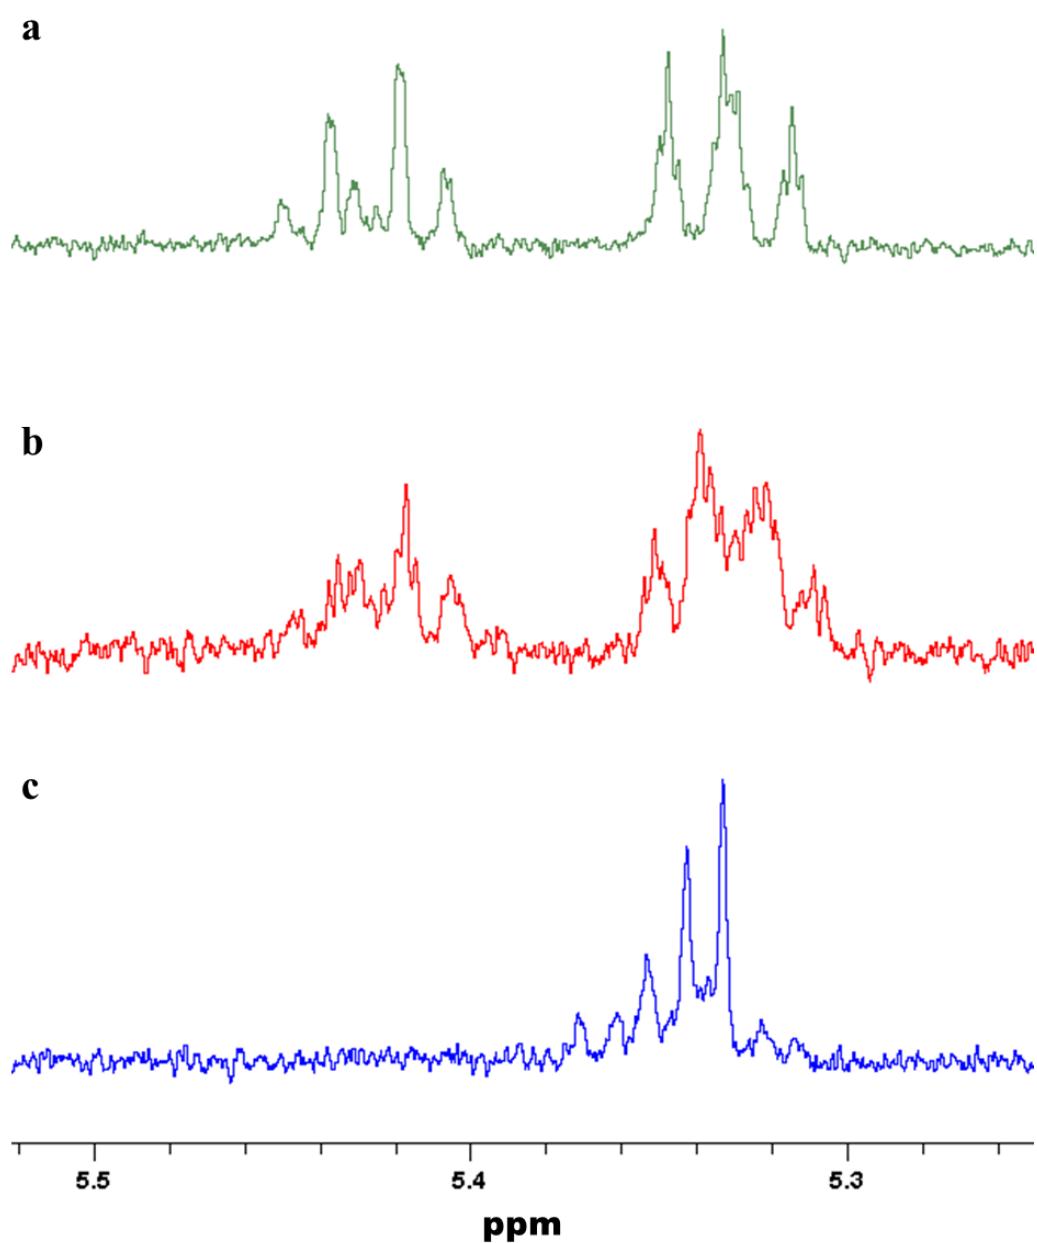

**Supplementary Figure 31. H-5, H-6, H-8, H-9, H-14, and H-15 of hepoxilin D<sub>3</sub>.** The peaks were confirmed with the selective TOCSY (mixing time = 80 ms). **(a)** H-14,15 irradiation on H-13. **(b)** H-9,8 irradiation on H-11. **(c)** H-5,6 irradiation on H-3.



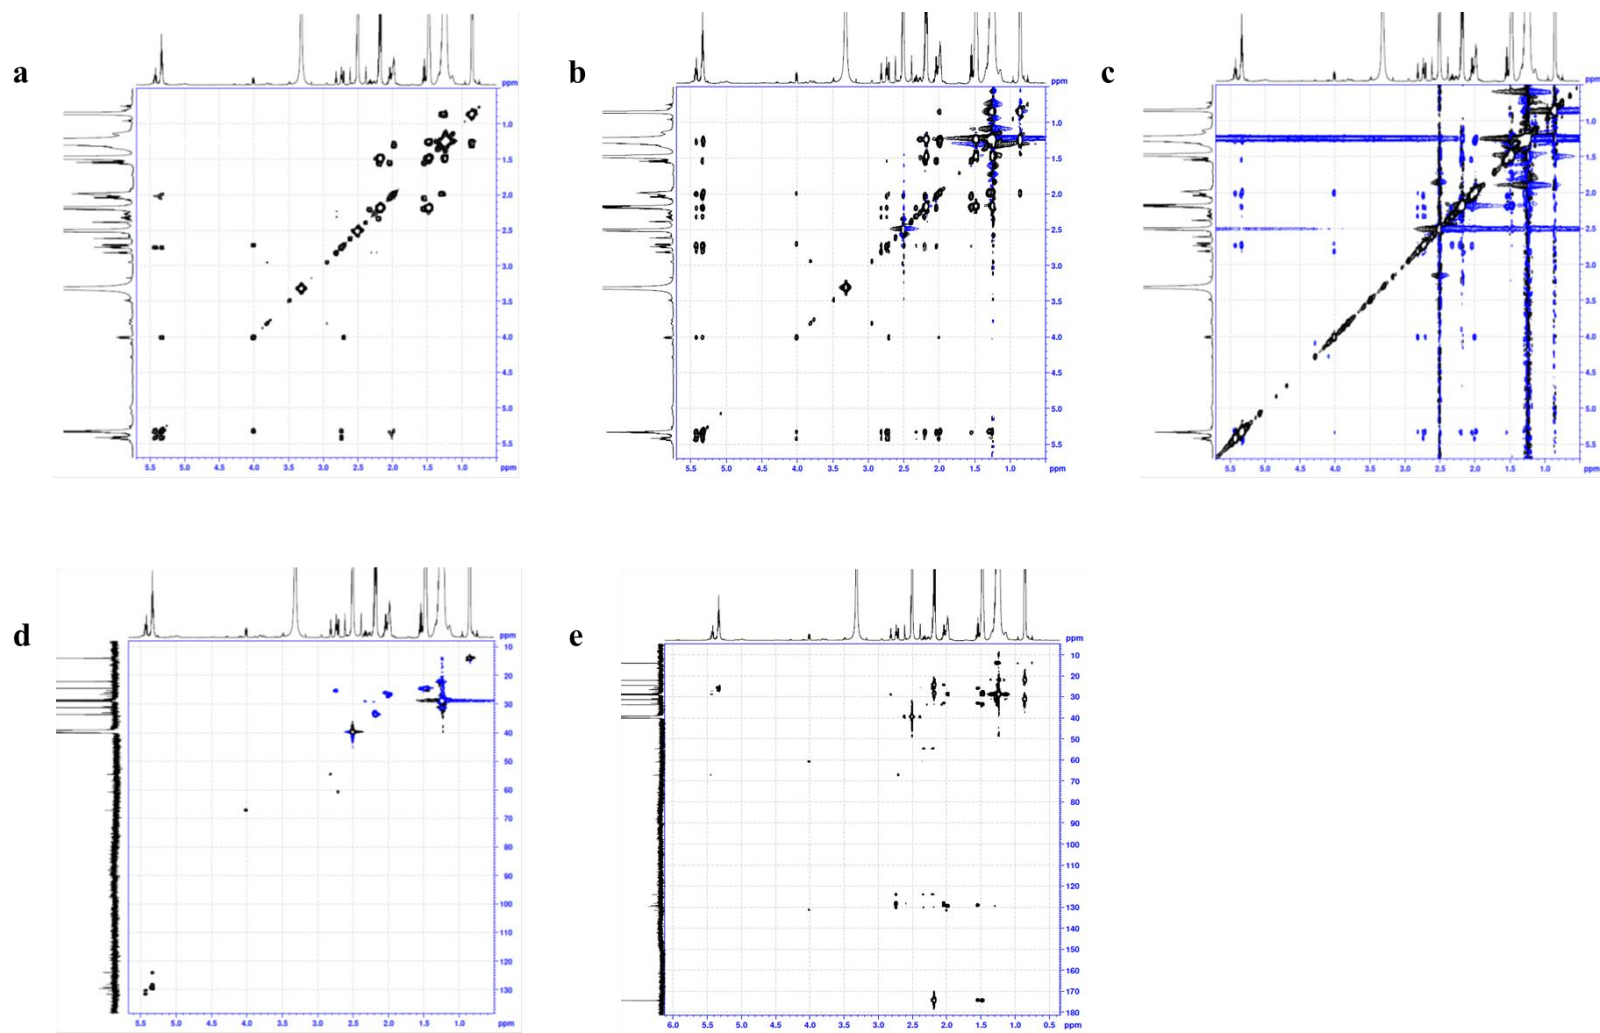

Supplementary Figure 32. 2D NMR of hepoxilin D<sub>3</sub>. (a) COSY. (b) TOCSY. (c) ROESY. (d) HSQC. (e) HMBC.

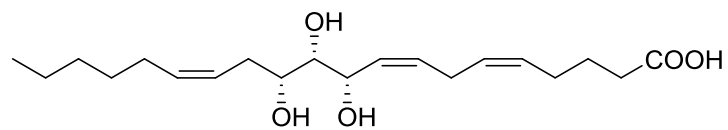

(5Z,8Z,10S,11S,12R,14Z)-10,11,12-trihydroxyicosa-5,8,14-trienoic acid

**Supplementary Figure 33. Structure of trioxilin B<sub>3</sub>.**

**a**

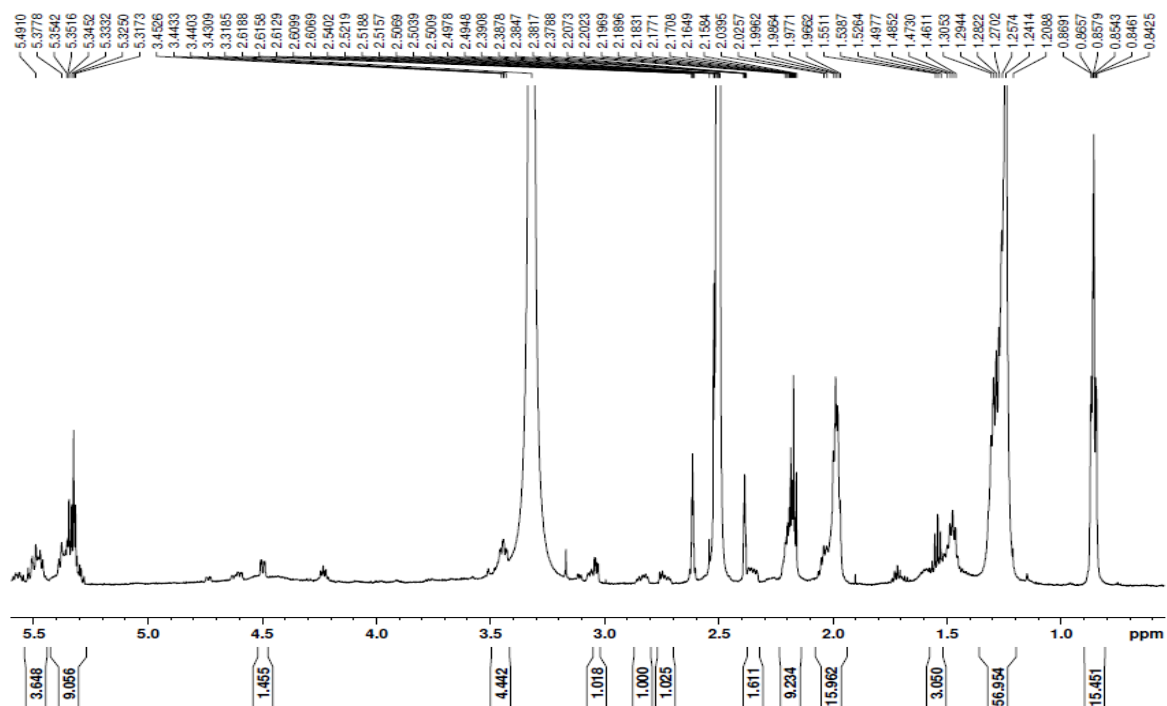

**b**

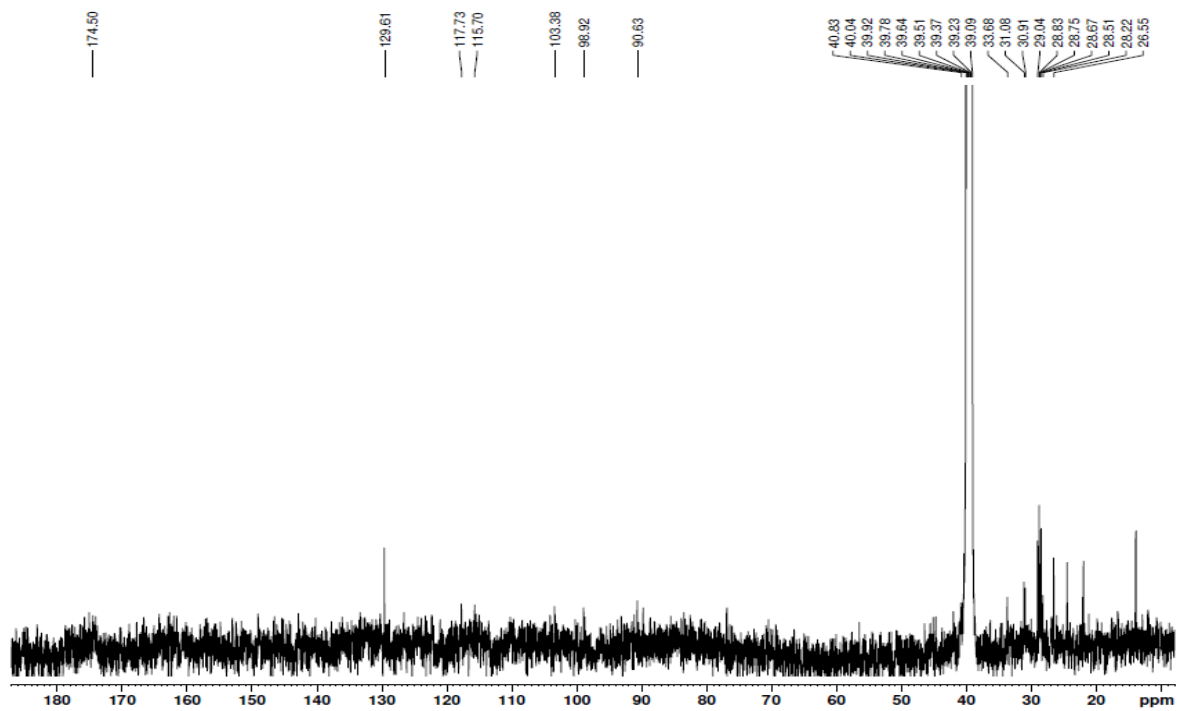

**Supplementary Figure 34. 1D NMR data of trioxilin B<sub>3</sub>. (a) <sup>1</sup>H NMR peak of TrXB<sub>3</sub>. (b) <sup>13</sup>C NMR peak of TrXB<sub>3</sub>.**

**a**

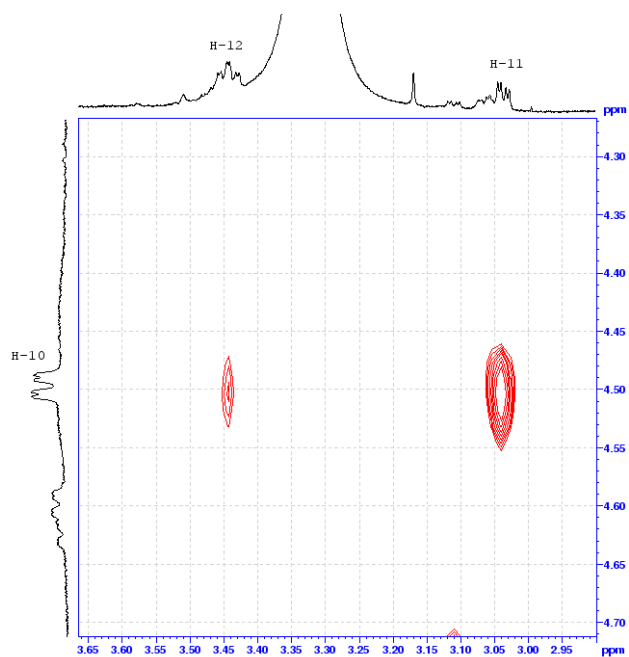

**b**

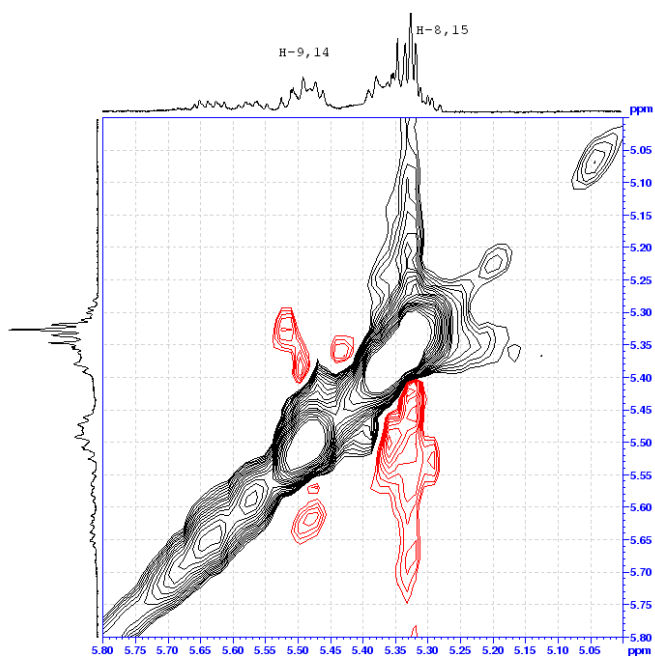

**Supplementary Figure 35. ROESY NMR of trioxilin B<sub>3</sub>.** (a) ROE correlation of H-10, H-11, and H-12 of HxD3 at ROESY. (b) ROE correlation of between H-14 and H-15 and between H-8 and H-9 of TrXB3 at ROESY.

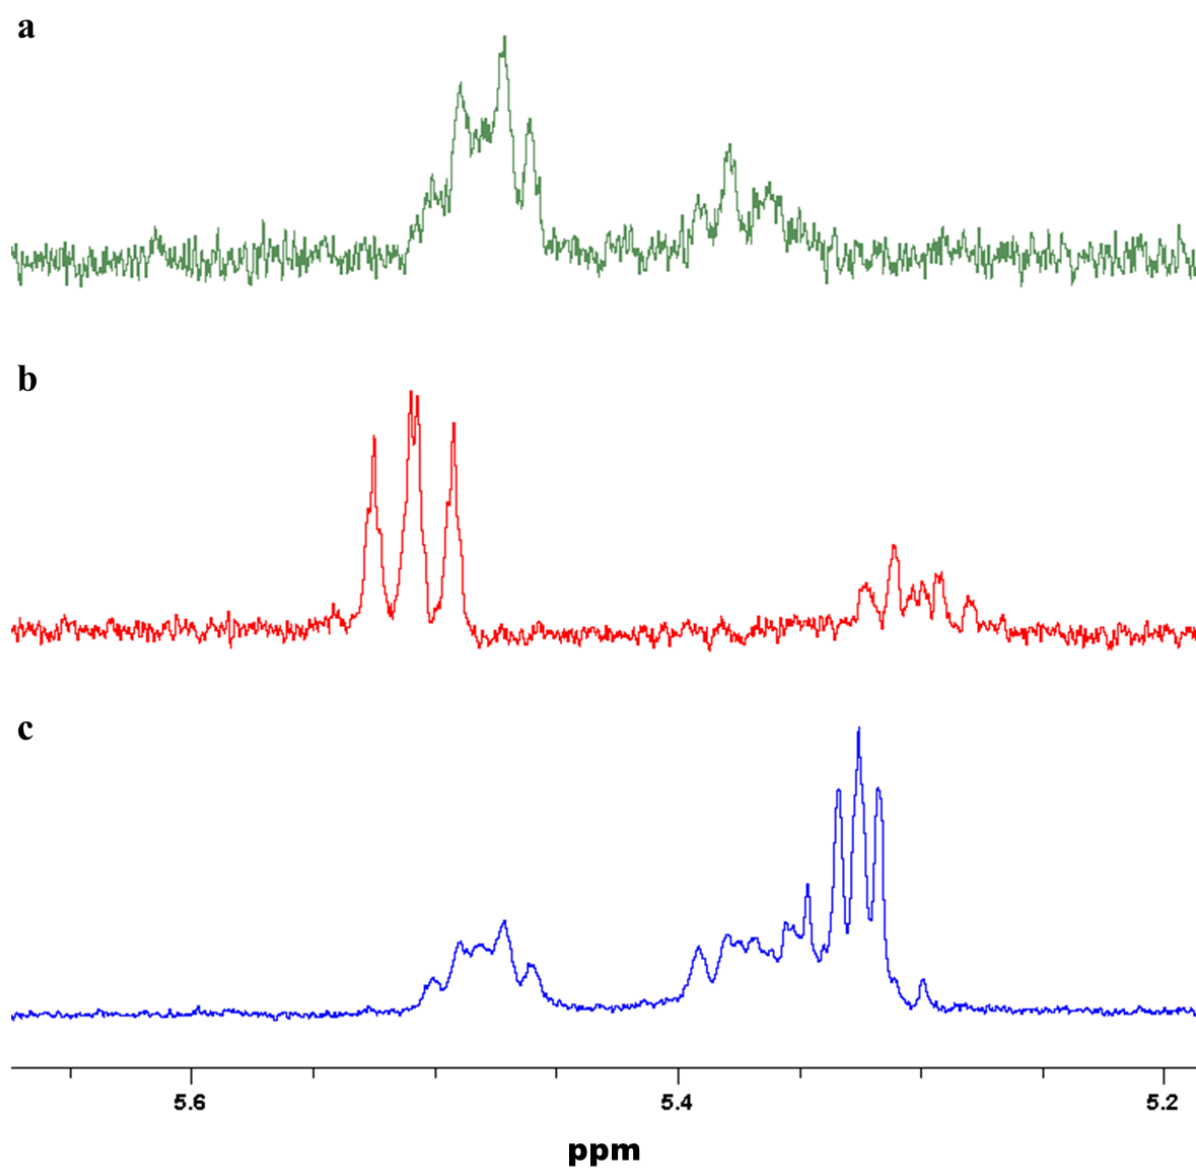

**Supplementary Figure 36. H-5, H-6, H-8, H-9, H-14, and H-15 of trioxilin B<sub>3</sub>.** The peaks were confirmed with the selective TOCSY (mixing time = 40 ms). **(a)** H-14,15 irradiation on H-13. **(b)** H-9,8 irradiation on H-10. **(c)** H-5,6 irradiation on H-2.

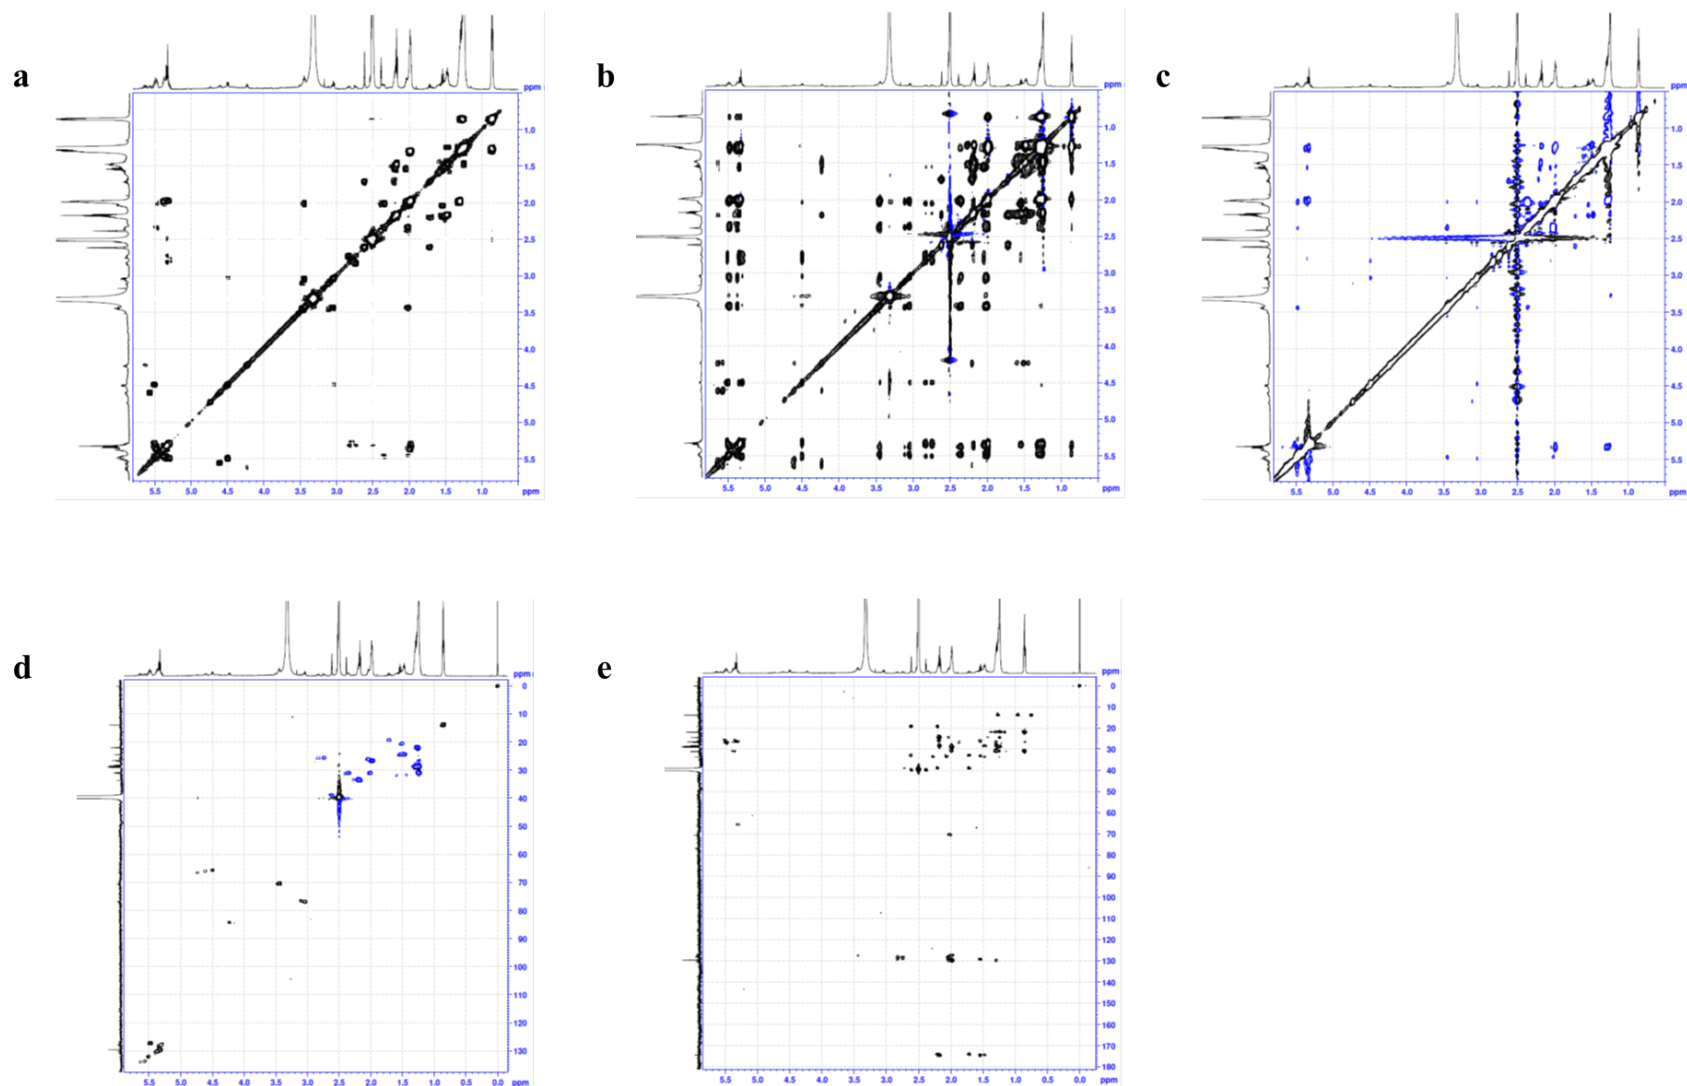

Supplementary Figure 37. 2D NMR of trioxilin B<sub>3</sub>. (a) COSY. (b) TOCSY. (c) ROESY. (d) HSQC. (e) HMBC.

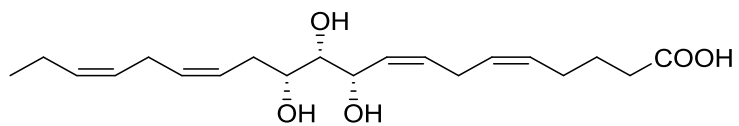

(5Z,8Z,10S,11S,12R,14Z,17Z)-10,11,12-trihydroxyicosa-5,8,14,17-tetraenoic acid

**Supplementary Figure 38. Structure of trioxilin B<sub>4</sub>.**

**a**

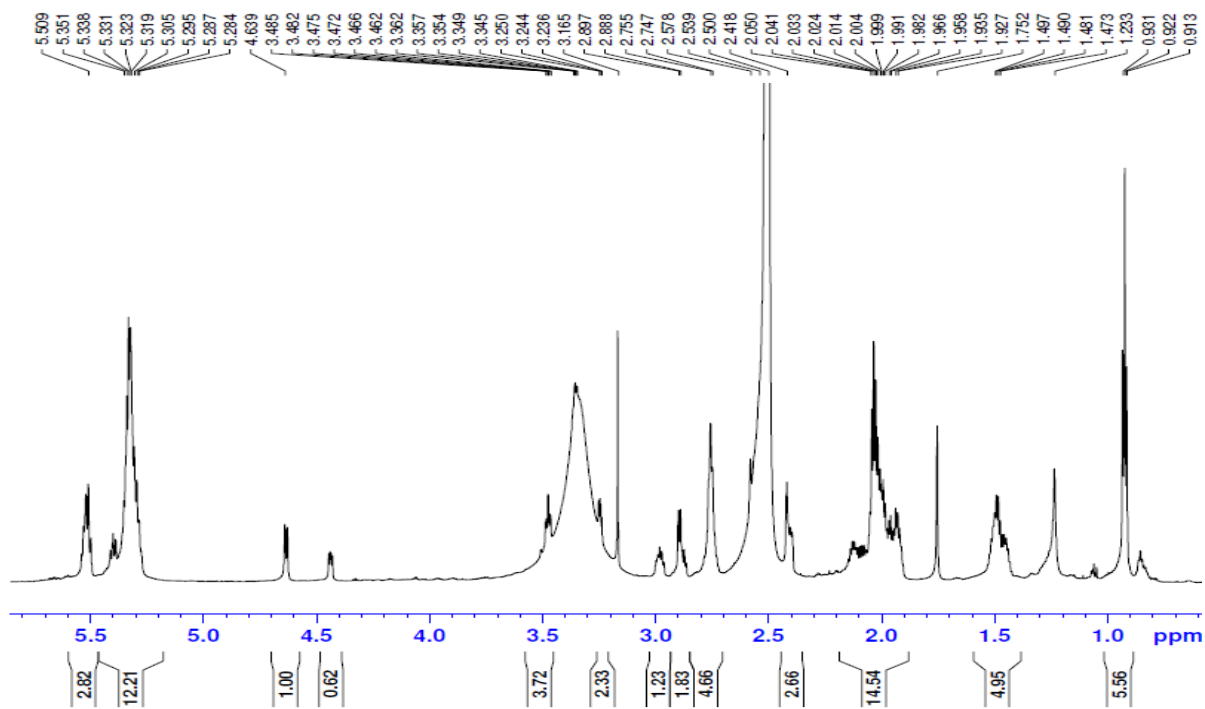

**b**

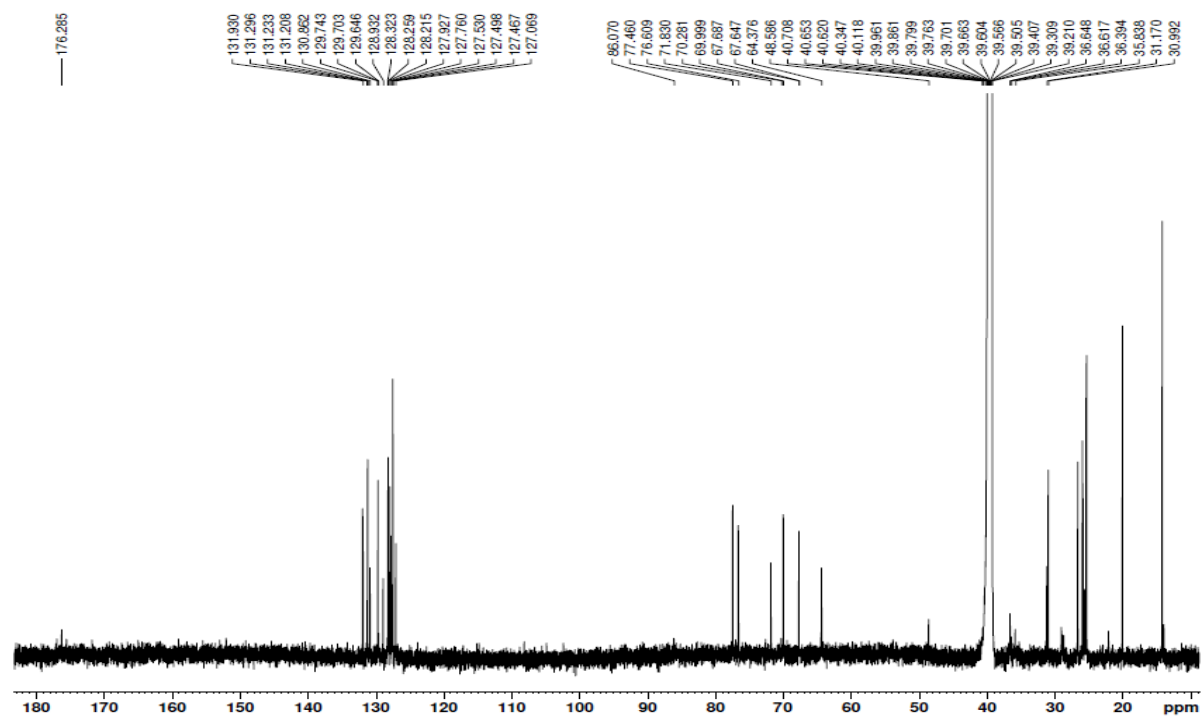

**Supplementary Figure 39. 1D NMR data of trioxilin B<sub>4</sub>. (a) <sup>1</sup>H NMR peak of TrXB<sub>4</sub>. (b) <sup>13</sup>C NMR peak of TrXB<sub>4</sub>.**



**a**

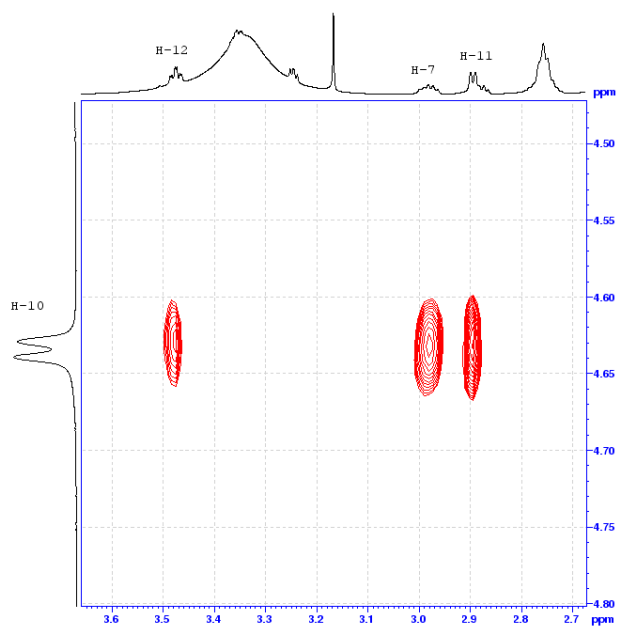

**b**

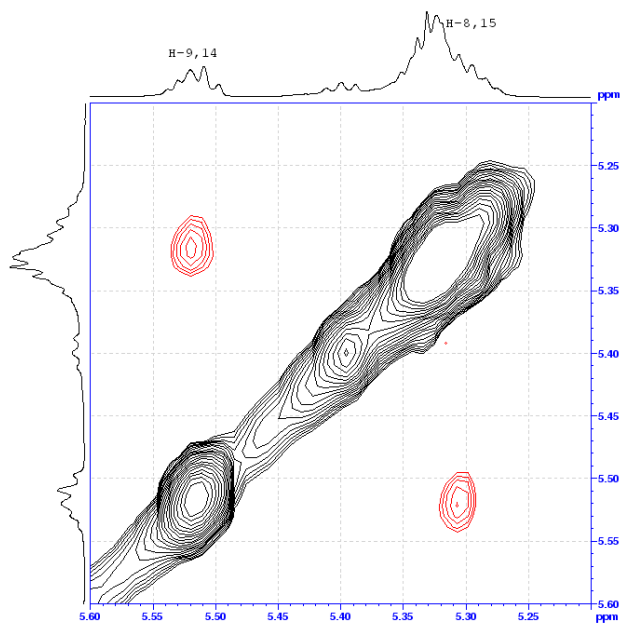

**Supplementary Figure 40. ROESY NMR of trioxilin B<sub>4</sub>.** (a) ROE correlation of H-10, H-11, and H-12 of TrXB4 at ROESY. (b) ROE correlation of between H-14 and H-15 and between H-8 and H-9 of TrXB4 at ROESY.

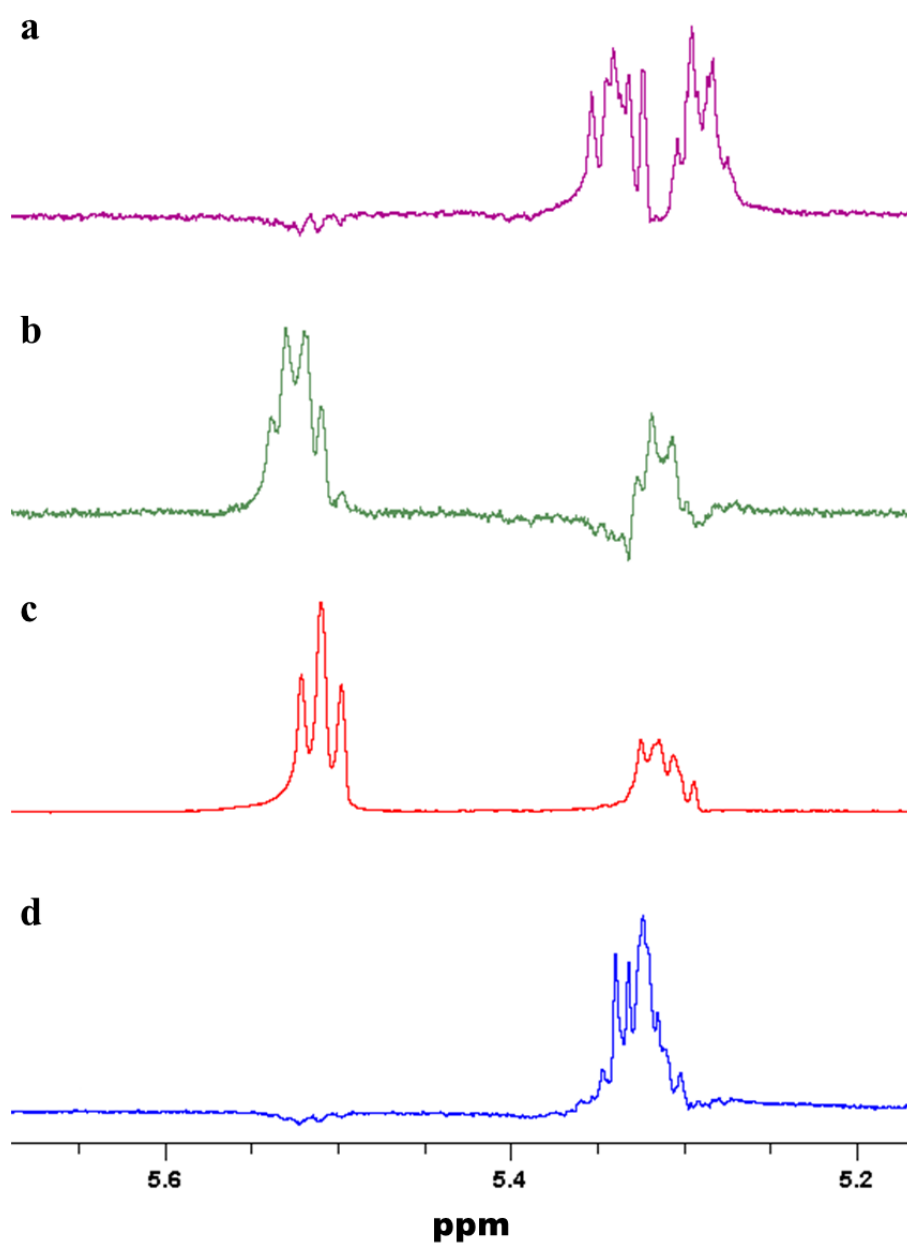

**Supplementary Figure 41. H-5, H-6, H-8, H-9, H-14, H-15, H-17, and H-18 of trioxilin B<sub>4</sub>.** The peaks were confirmed with the selective TOCSY (mixing time = 80 ms). **(a)** H-5,6 irradiation on H-3. **(b)** H-9,8 irradiation on H-10. **(c)** H-14,15 irradiation on H-12. **(d)** H-18,17 irradiation on H-20.

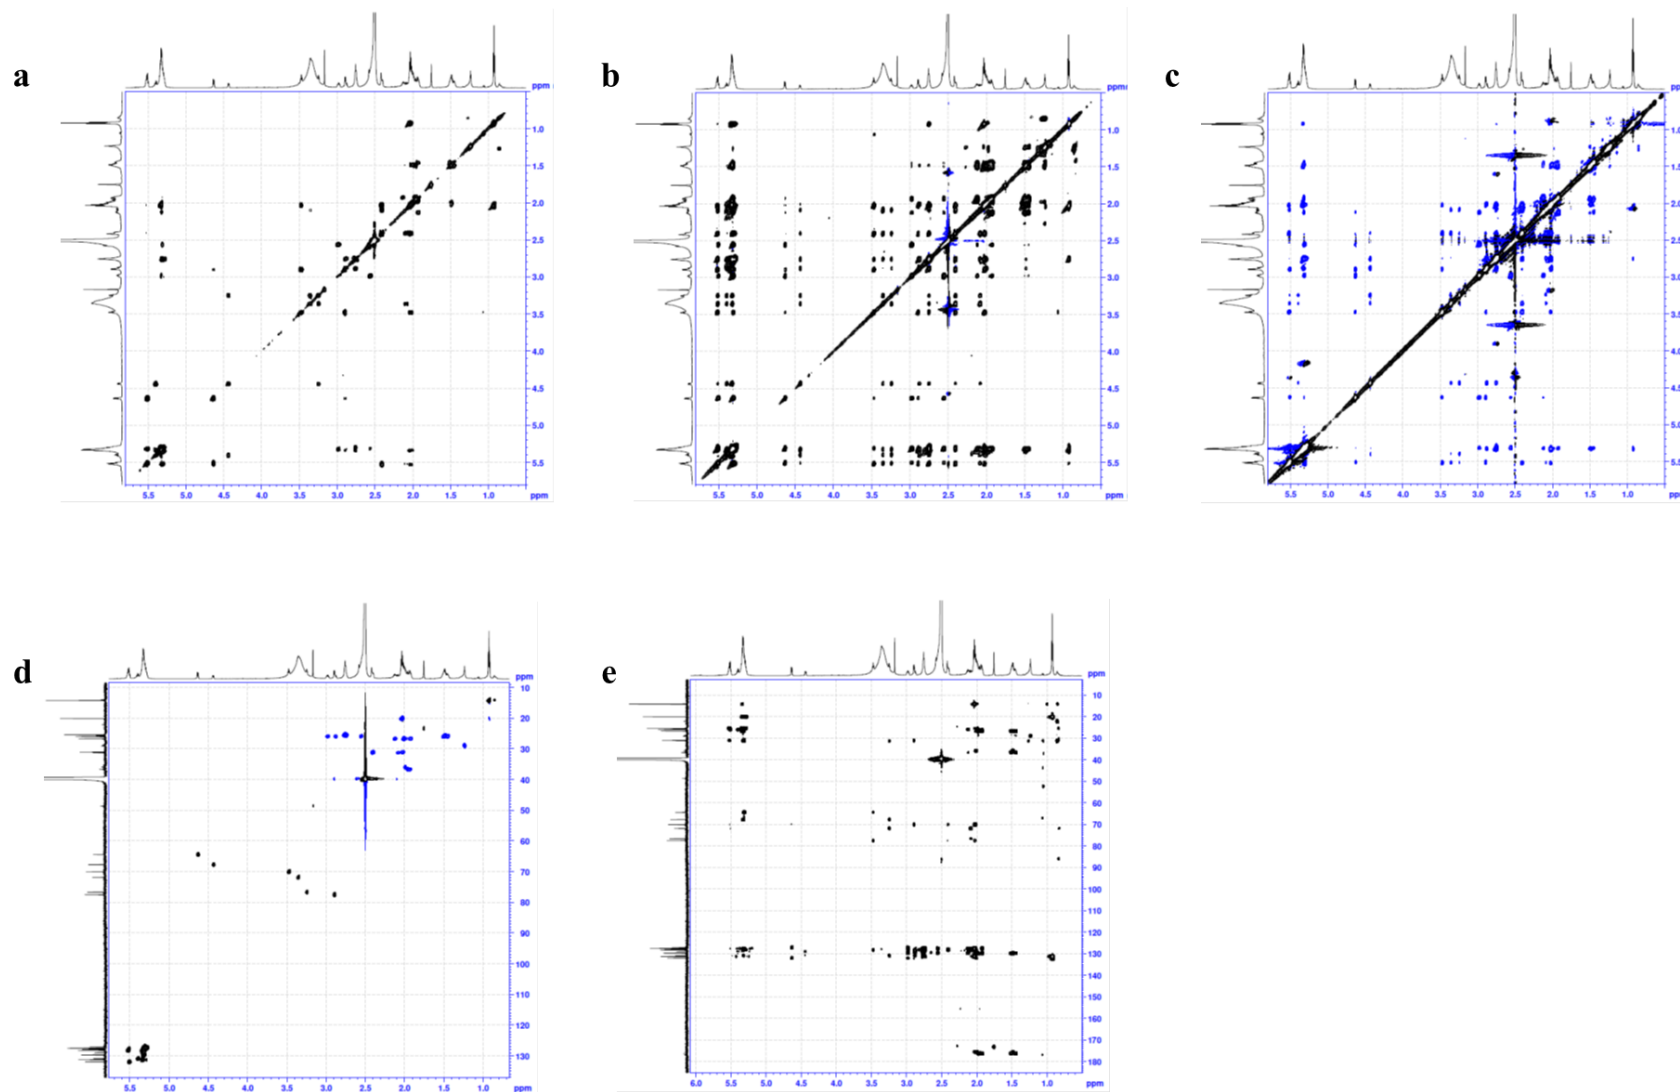

Supplementary Figure 42. 2D NMR of trioxilin B<sub>4</sub>. (a) COSY. (b) TOCSY. (c) ROESY. (d) HSQC. (e) HMBC.

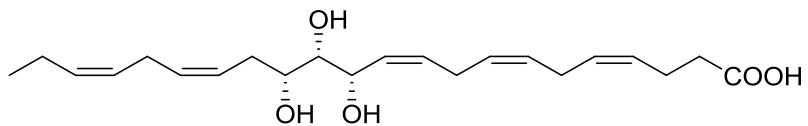

(4Z,7Z,10Z,12S,13S,14R,16Z,19Z)-12,13,14-trihydroxydocosa-4,7,10,16,19-pentaenoic acid

**Supplementary Figure 43. Structure of trioxilin B<sub>5</sub>.**

**a**

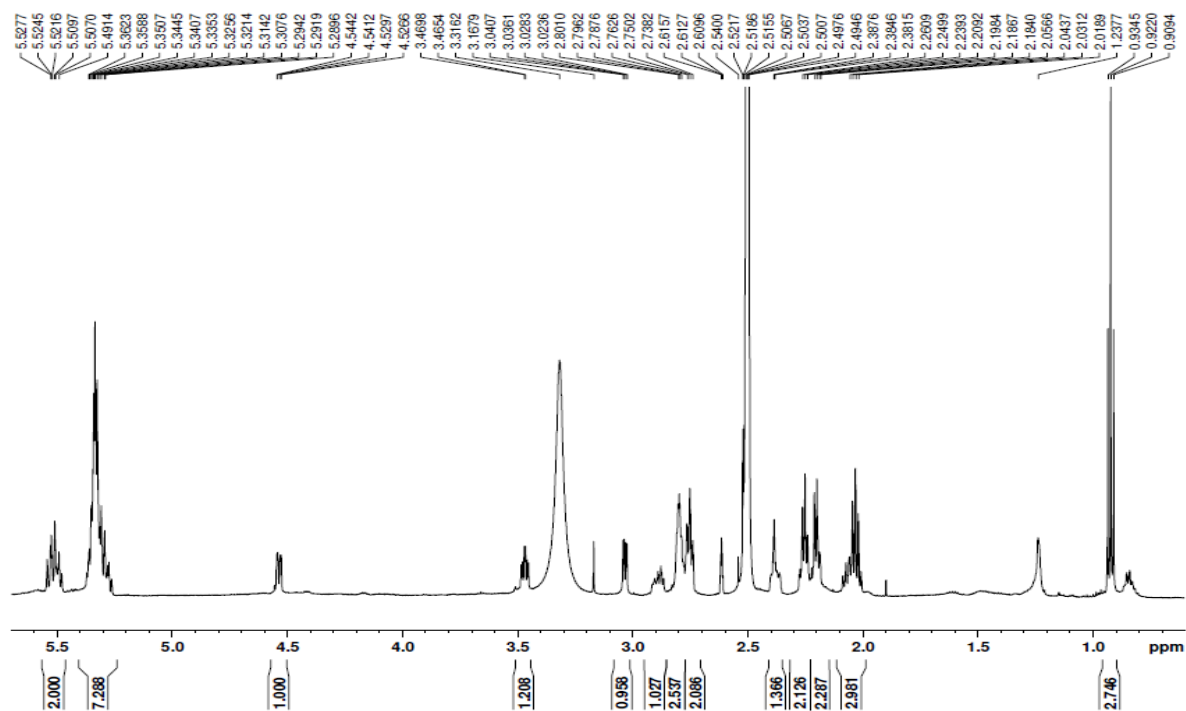

**b**

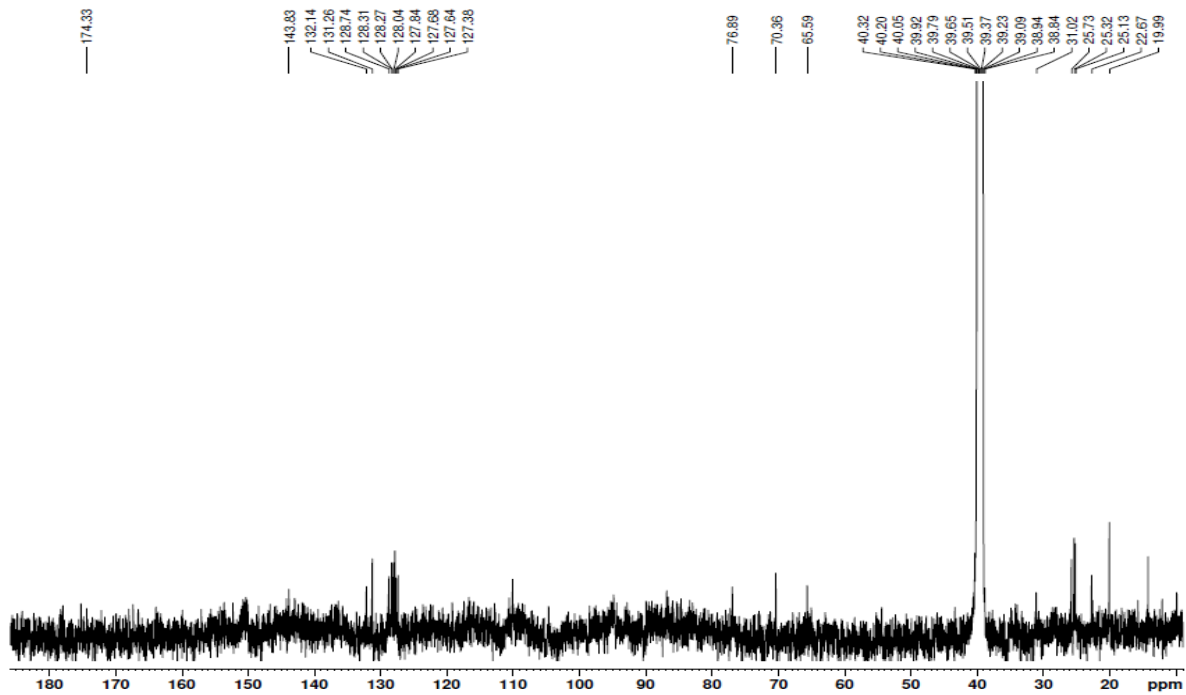

**Supplementary Figure 44. 1D NMR data of trioxilin B<sub>5</sub>. (a) <sup>1</sup>H NMR peak of TrXB<sub>5</sub>. (b) <sup>13</sup>C NMR peak of TrXB<sub>5</sub>.**

**a**

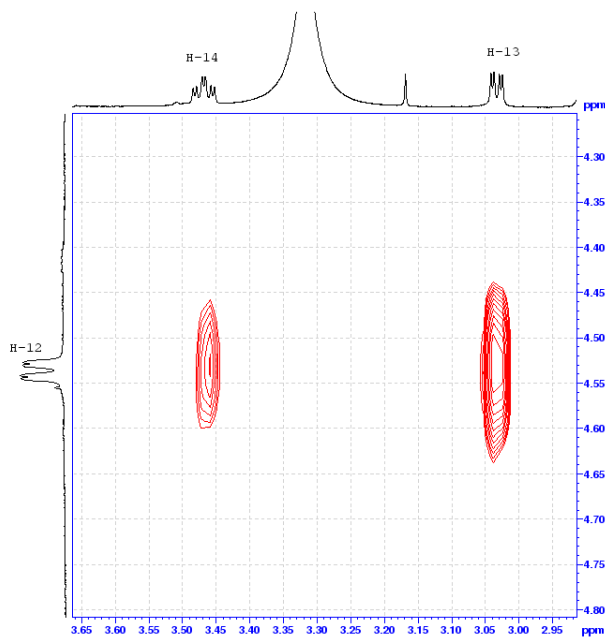

**b**

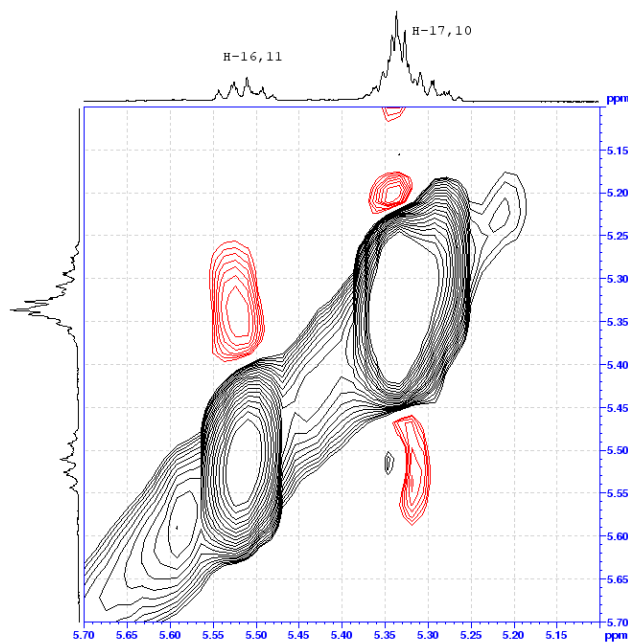

**Supplementary Figure 45. ROESY NMR of trioxilin B<sub>5</sub>. (a)** ROE correlation of H-12, H-13, and H-14 of TrXB5 at ROESY. **(b)** ROE correlation of between H-16 and H-17 and between H-10 and H-11 of TrXB5 at ROESY.

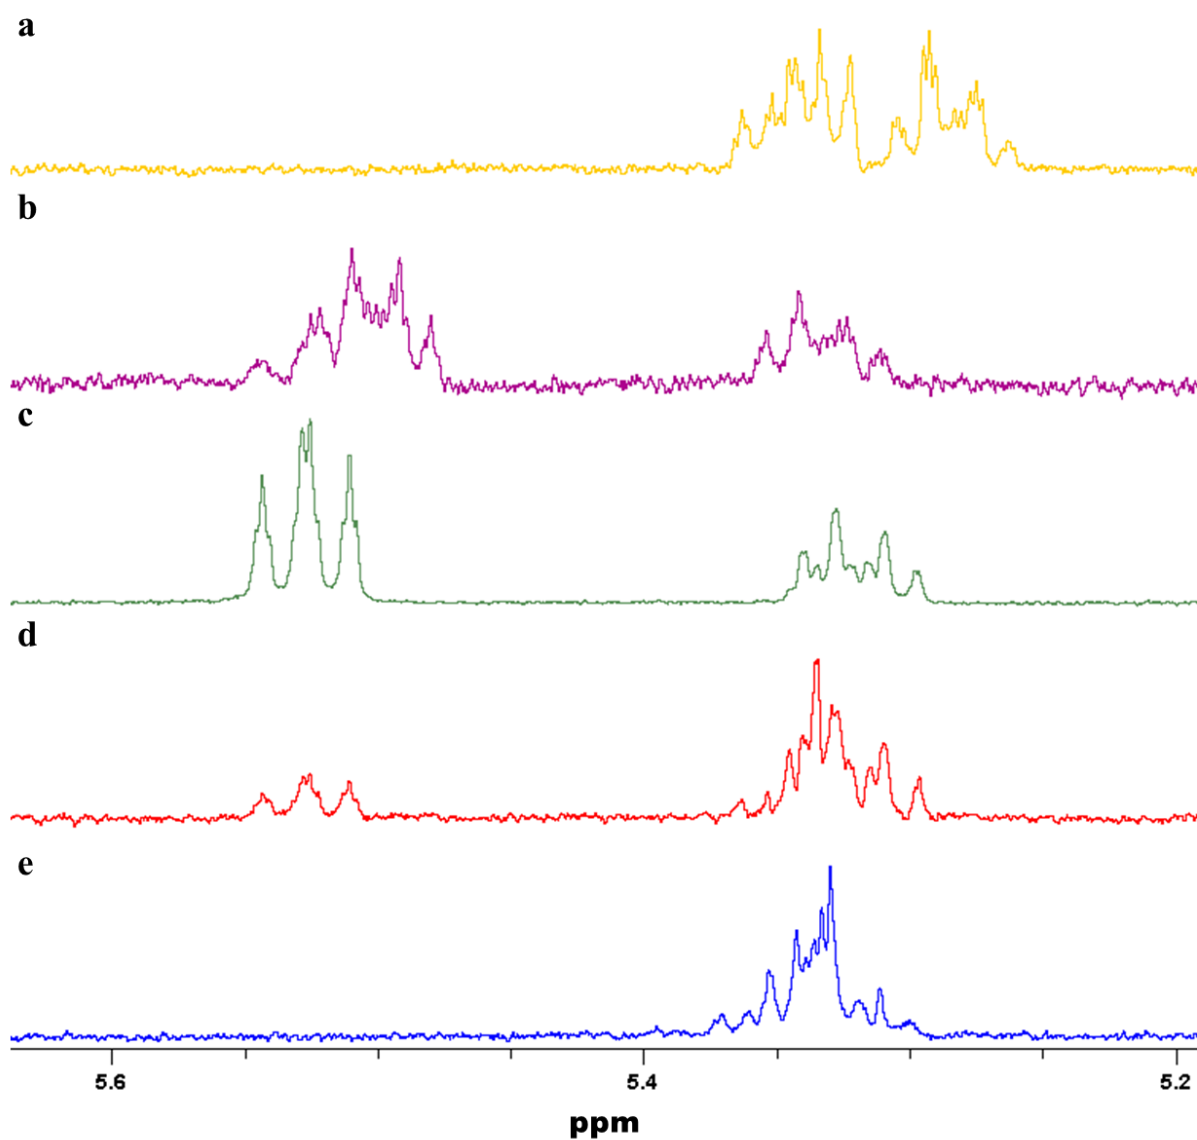

**Supplementary Figure 46. H-4, H-5, H-7, H-8, H-10, H-11, H-17, H-19, and H-20 of trioxilin B<sub>5</sub>.** The peaks were confirmed with the selective TOCSY (mixing time = 80 ms). **(a)** H-20,19 irradiation on H-22. **(b)** H-16,17 irradiation on H-14. **(c)** H-11,10 irradiation on H-12. **(d)** H-8,7 irradiation on H-9. **(e)** H-4,5 irradiation on H-2.

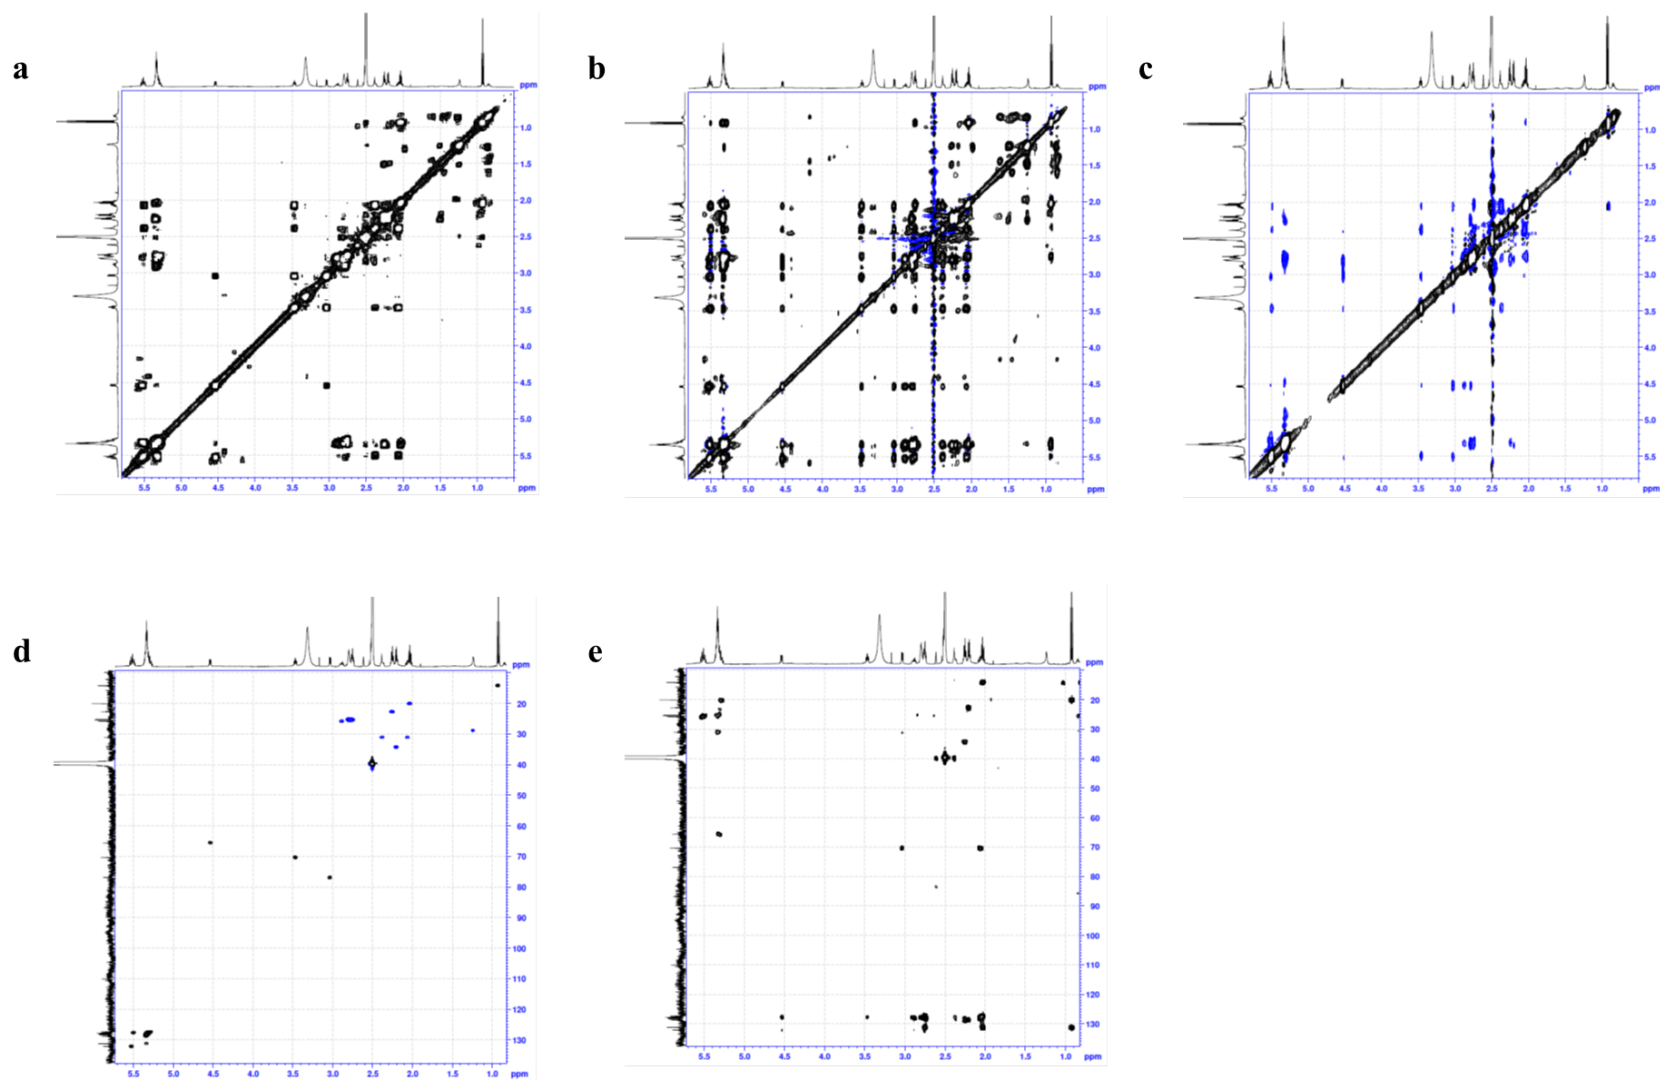

Supplementary Figure 47. 2D NMR of trioxilin B<sub>5</sub>. (a) COSY. (b) TOCSY. (c) ROESY. (d) HSQC. (e) HMBC.



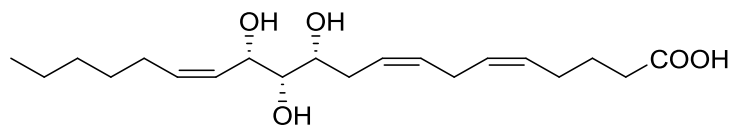

(5Z,8Z,11R,12S,13S,14Z)-11,12,13-trihydroxyicosa-5,8,14-trienoic acid

**Supplementary Figure 48. Structure of trioxilin D<sub>3</sub>.**

**a**

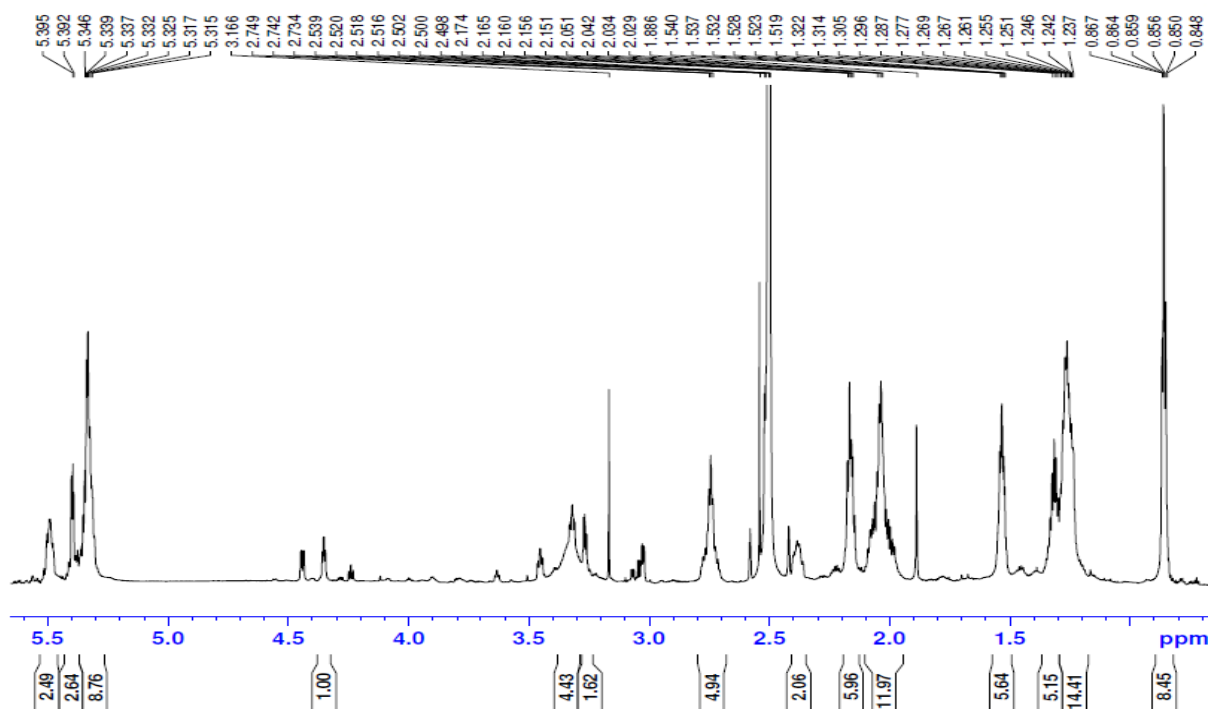

**b**

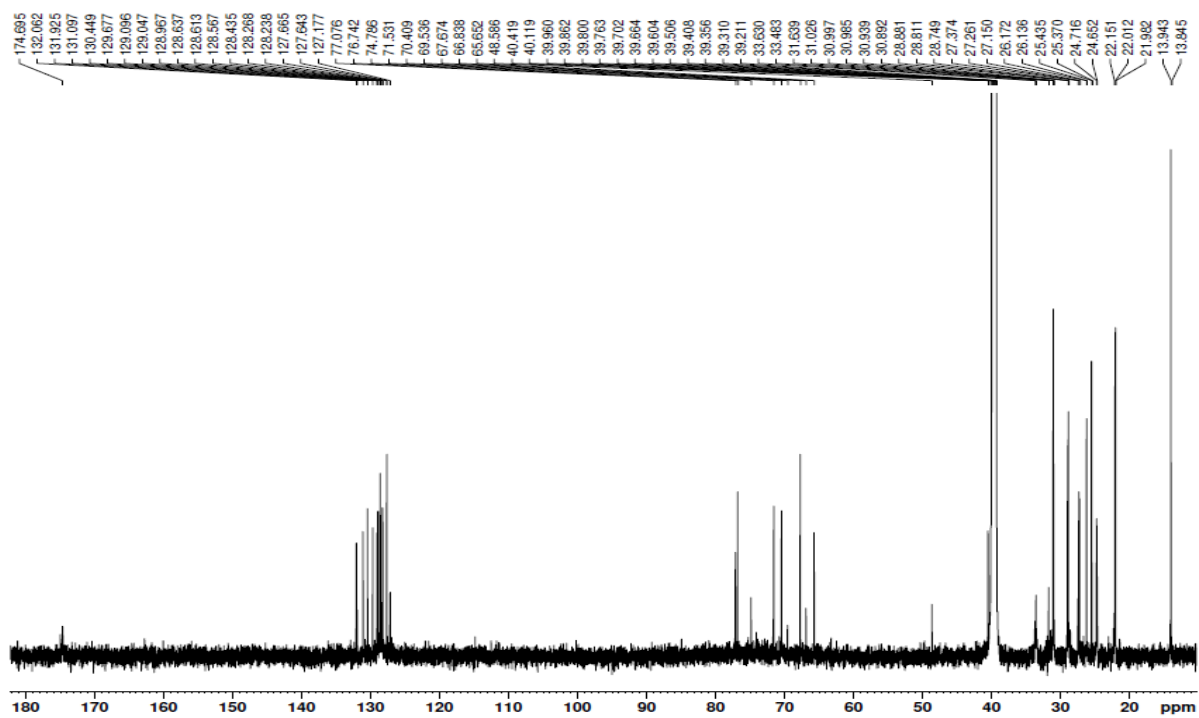

**Supplementary Figure 49. 1D NMR data of trioxilin D<sub>3</sub>. (a) <sup>1</sup>H NMR peak of TrXD<sub>3</sub>. (b) <sup>13</sup>C NMR peak of TrXD<sub>3</sub>.**

**a**

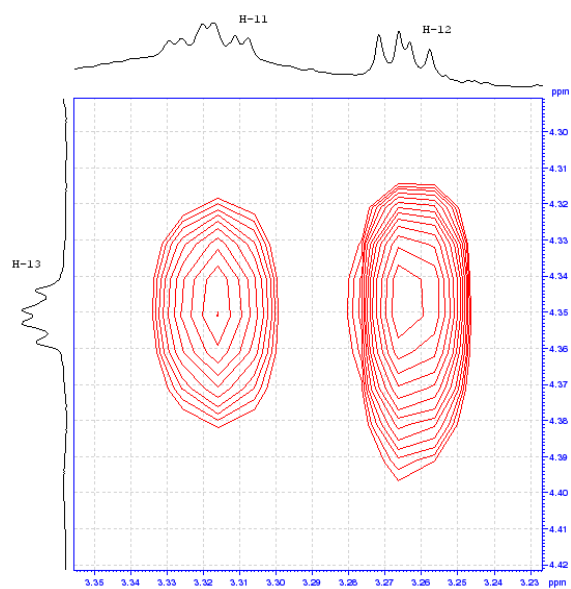

**b**

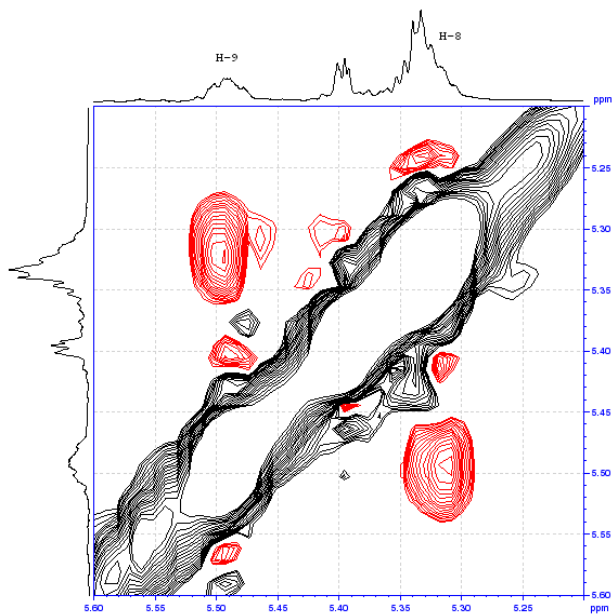

**Supplementary Figure 50. ROESY NMR of trioxilin D<sub>3</sub>. (a)** ROE correlation of H-11, H-12, and H-13 of TrXD3 at ROESY. **(b)** ROE correlation of between H-8 and H-9 of TrXD3 at ROESY.

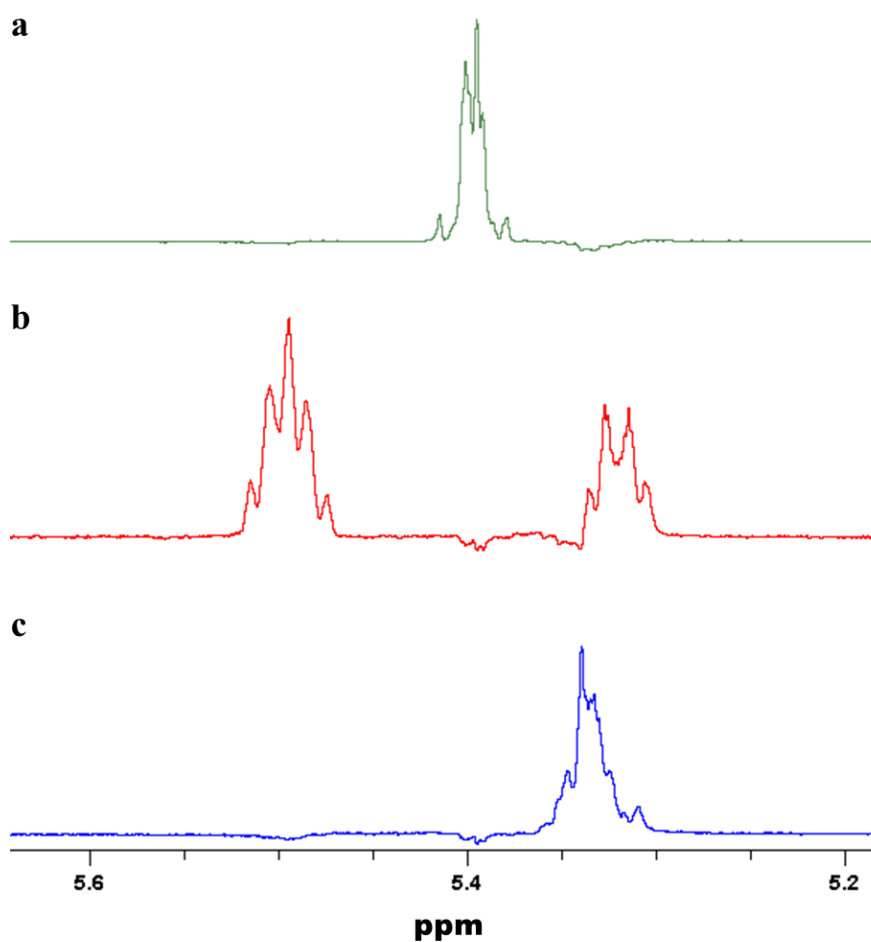

**Supplementary Figure 51. H-5, H-6, H-8, H-9, H-14, and H-15 of trioxilin D<sub>3</sub>.** The peaks were confirmed with the selective TOCSY (mixing time = 40 ms). **(a)** H-14,15 irradiation on H-13. **(b)** H-9,8 irradiation on H-11. **(c)** H-5,6 irradiation on H-3.

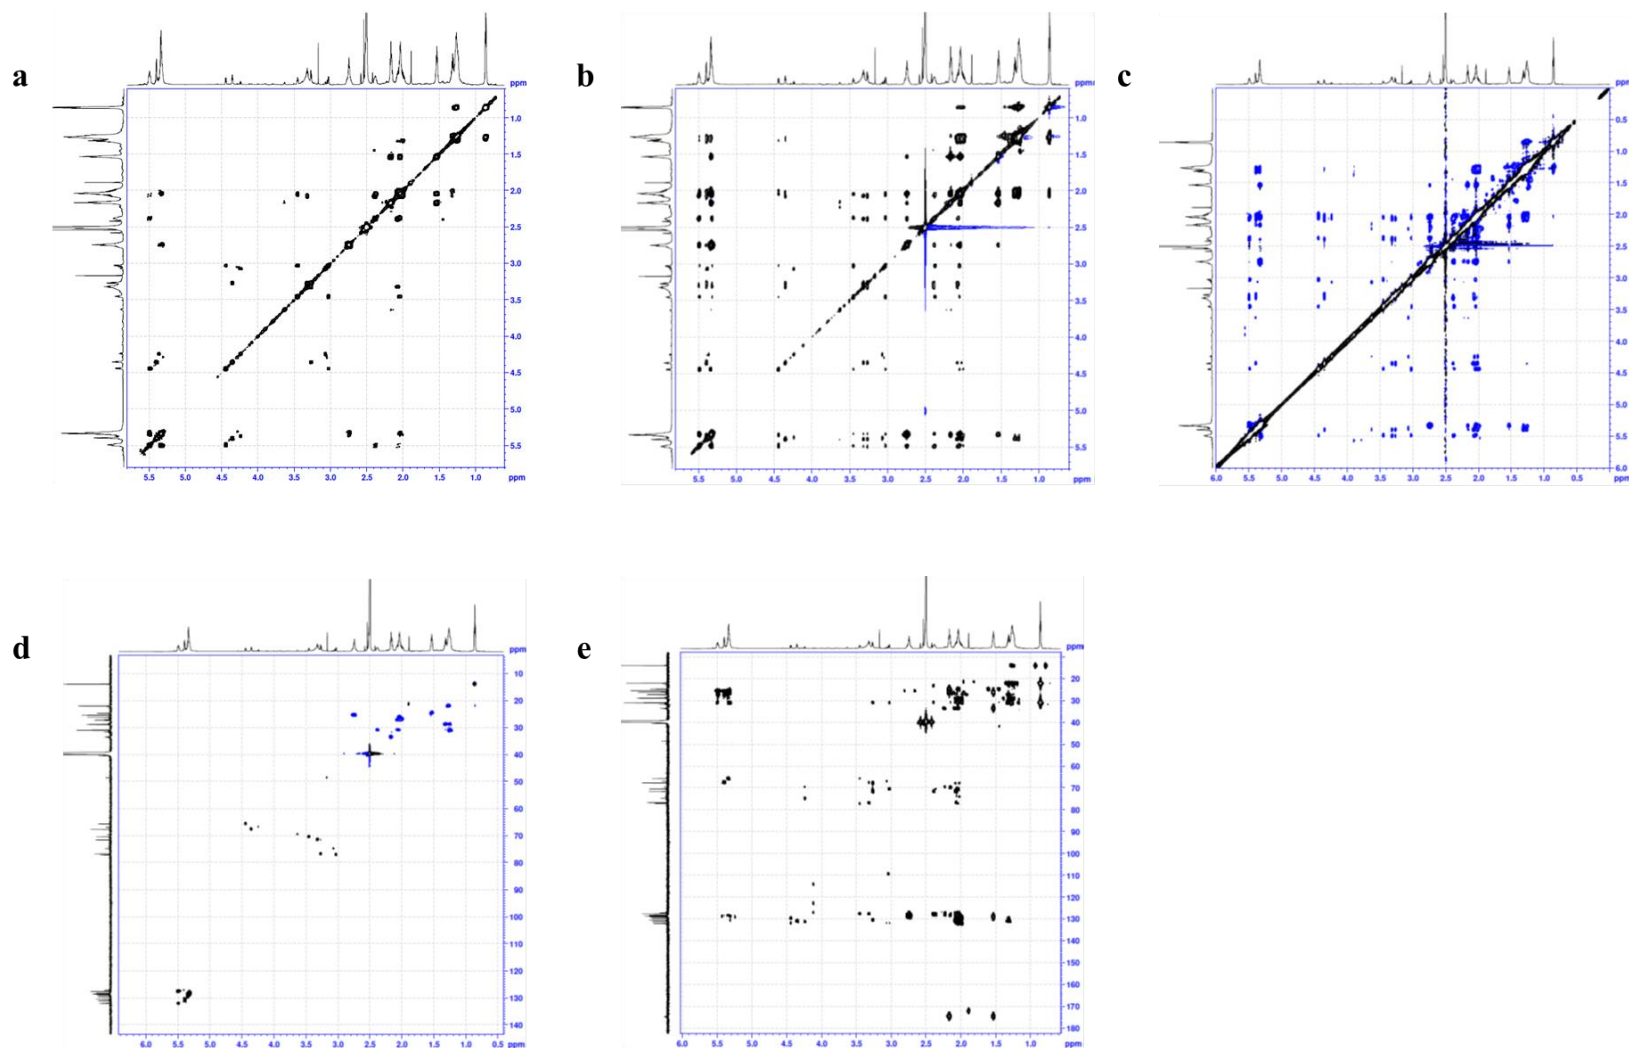

Supplementary Figure 52. 2D NMR of trioxilin D<sub>3</sub>. (a) COSY. (b) TOCSY. (c) ROESY. (d) HSQC. (e) HMBC.

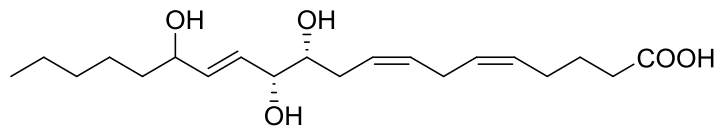

(5Z,8Z,11R,12R,13E)-11,12,15-trihydroxyicosa-5,8,13-trienoic acid

**Supplementary Figure 53. Structure of trioxilin E<sub>3</sub>.**

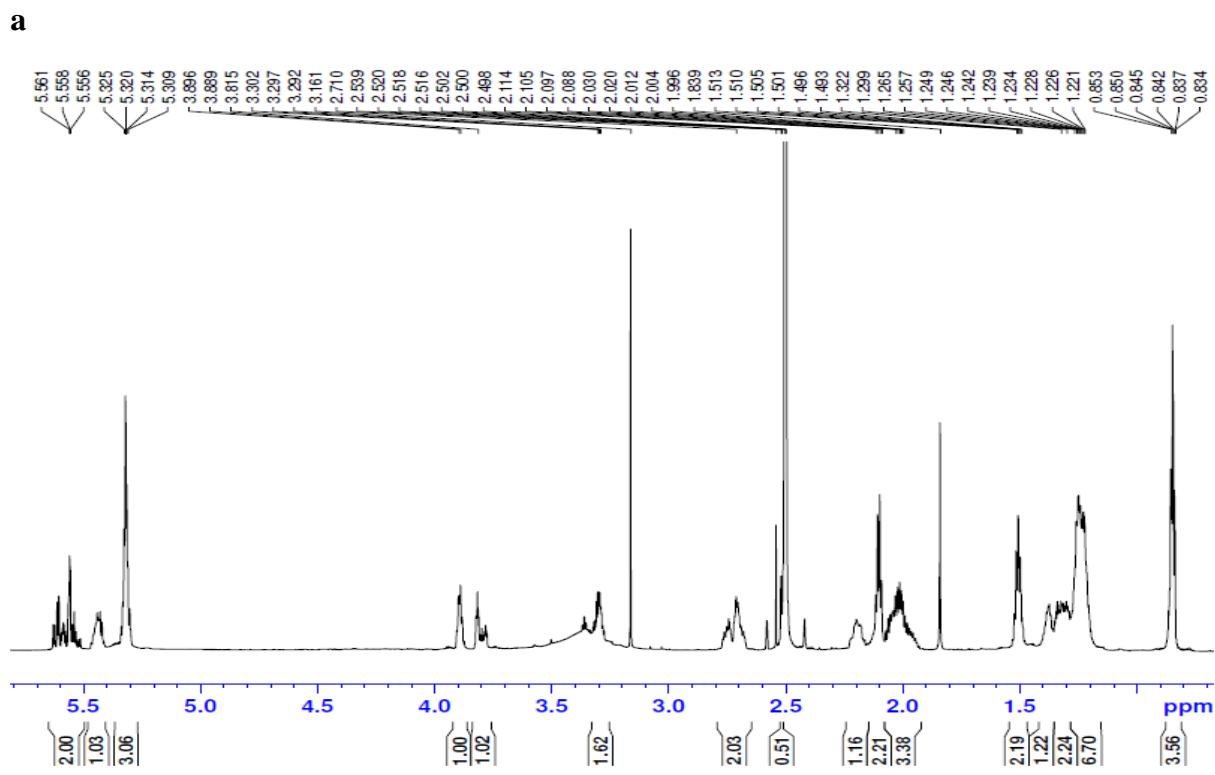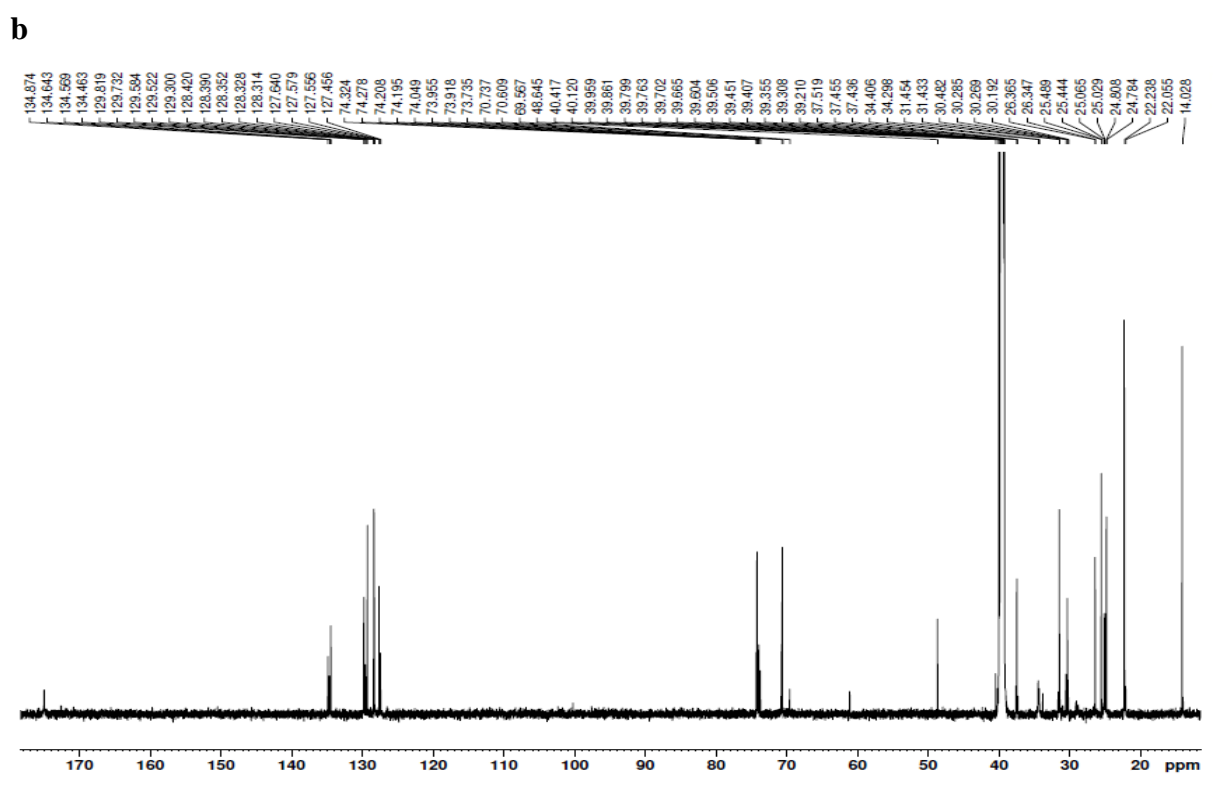

**Supplementary Figure 54. 1D NMR data of trioxilin E<sub>3</sub>. (a) <sup>1</sup>H NMR peak of TrXE<sub>3</sub>. (b) <sup>13</sup>C NMR peak of TrXE<sub>3</sub>.**

**a**

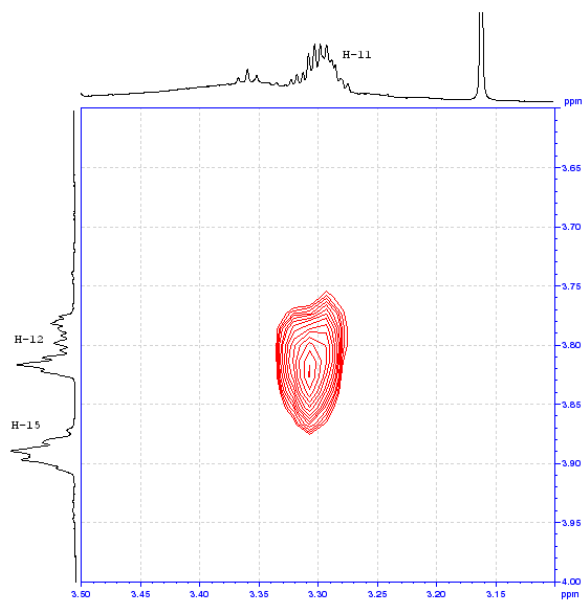

**b**

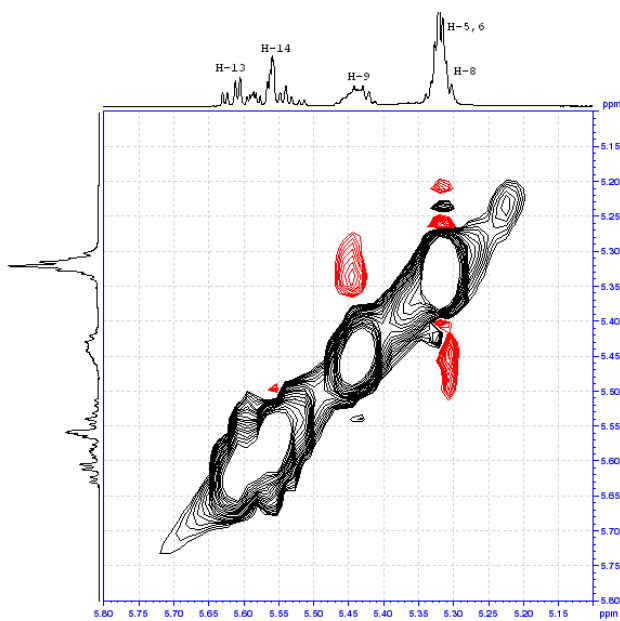

**Supplementary Figure 55. ROESY NMR of trioxilin E<sub>3</sub>. (a)** ROE correlation of H-11, H-12, and H-13 of TrXE<sub>3</sub> at ROESY. **(b)** ROE correlation of between H-8 and H-9 of TrXE<sub>3</sub> at ROESY.



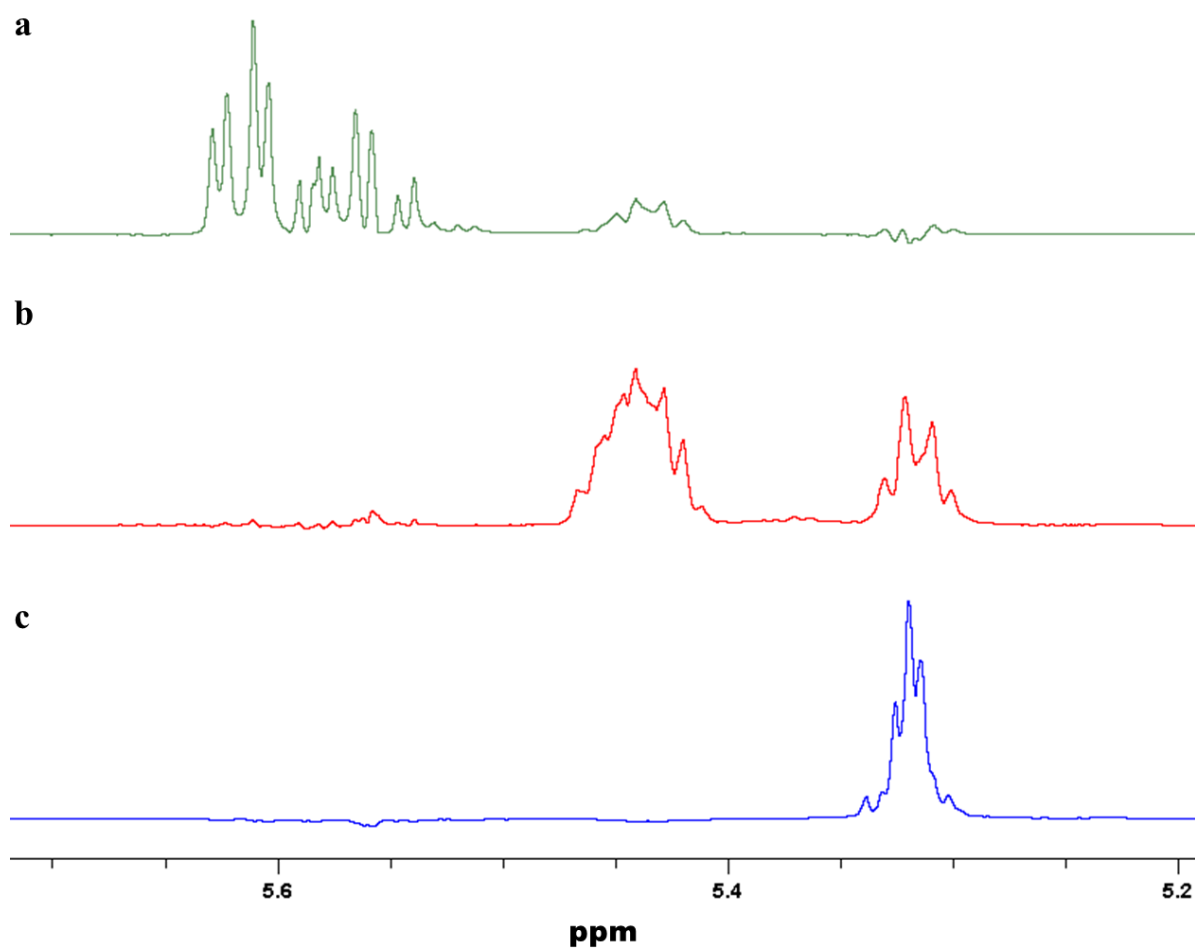

**Supplementary Figure 56. H-5, H-6, H-8, H-9, H-14, and H-15 of trioxilin E<sub>3</sub>.** The peaks were confirmed with the selective TOCSY (mixing time = 80 ms). **(a)** H-13,14 irradiation on H-12. **(b)** H-9,8 irradiation on H-10. **(c)** H-5,6 irradiation on H-3.

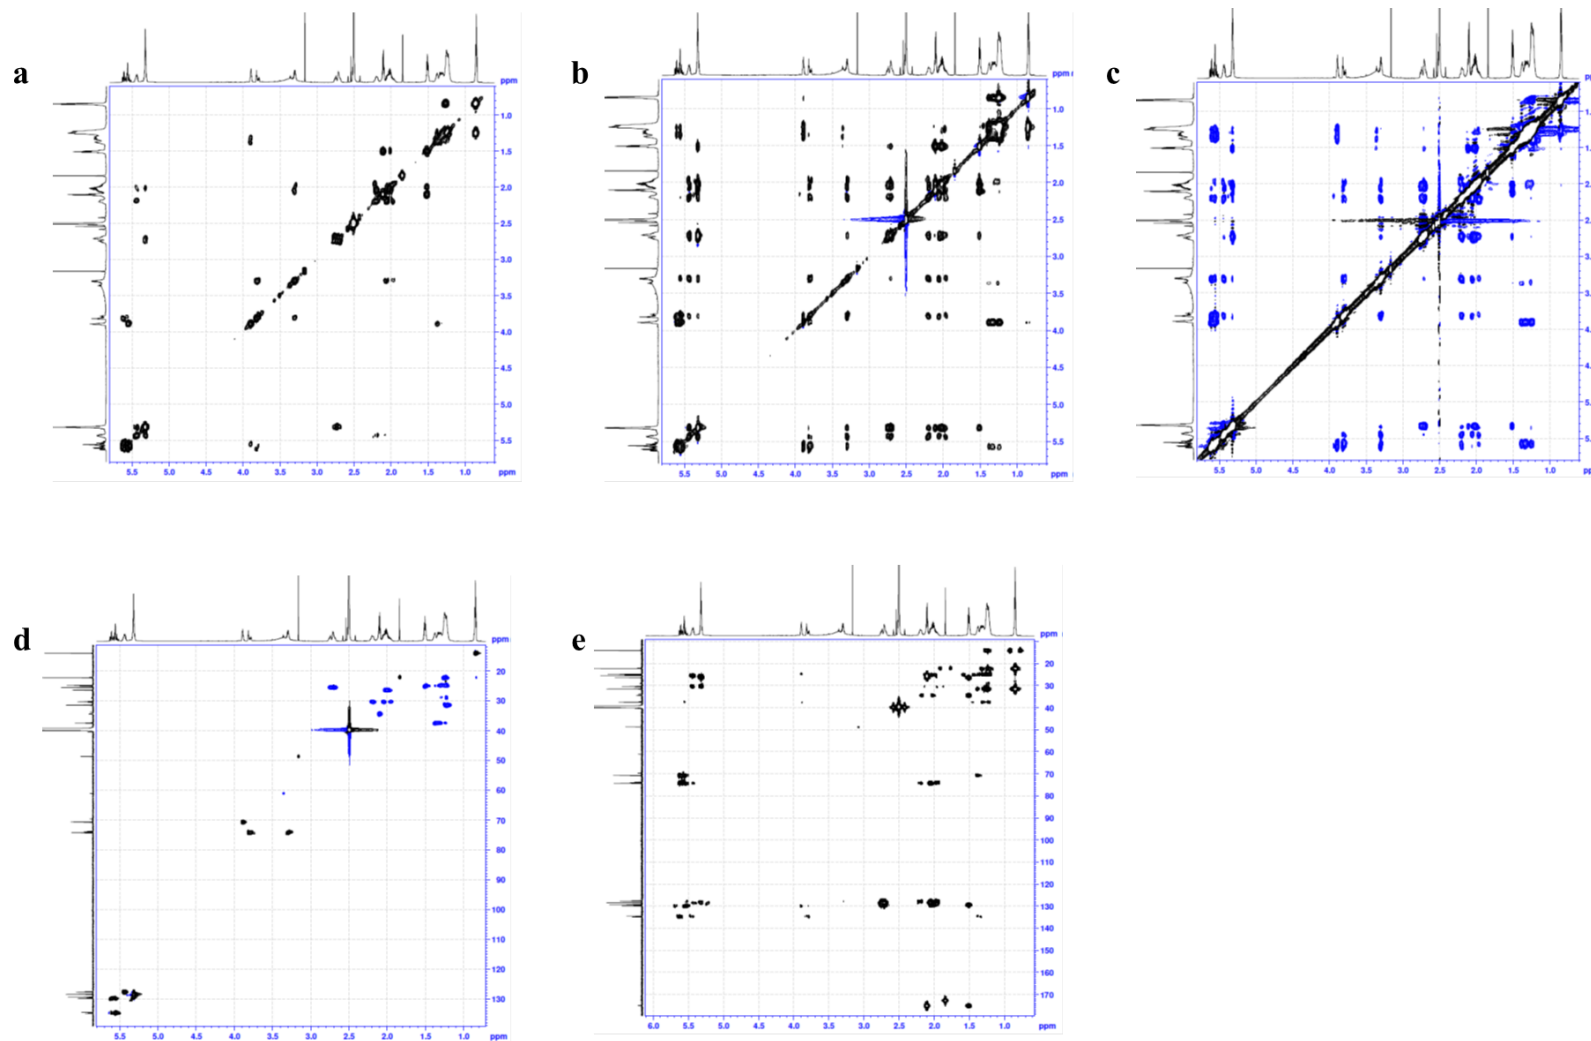

Supplementary Figure 57. 2D NMR of trioxilin E<sub>3</sub>. (a) COSY. (b) TOCSY. (c) ROESY. (d) HSQC. (e) HMBC.

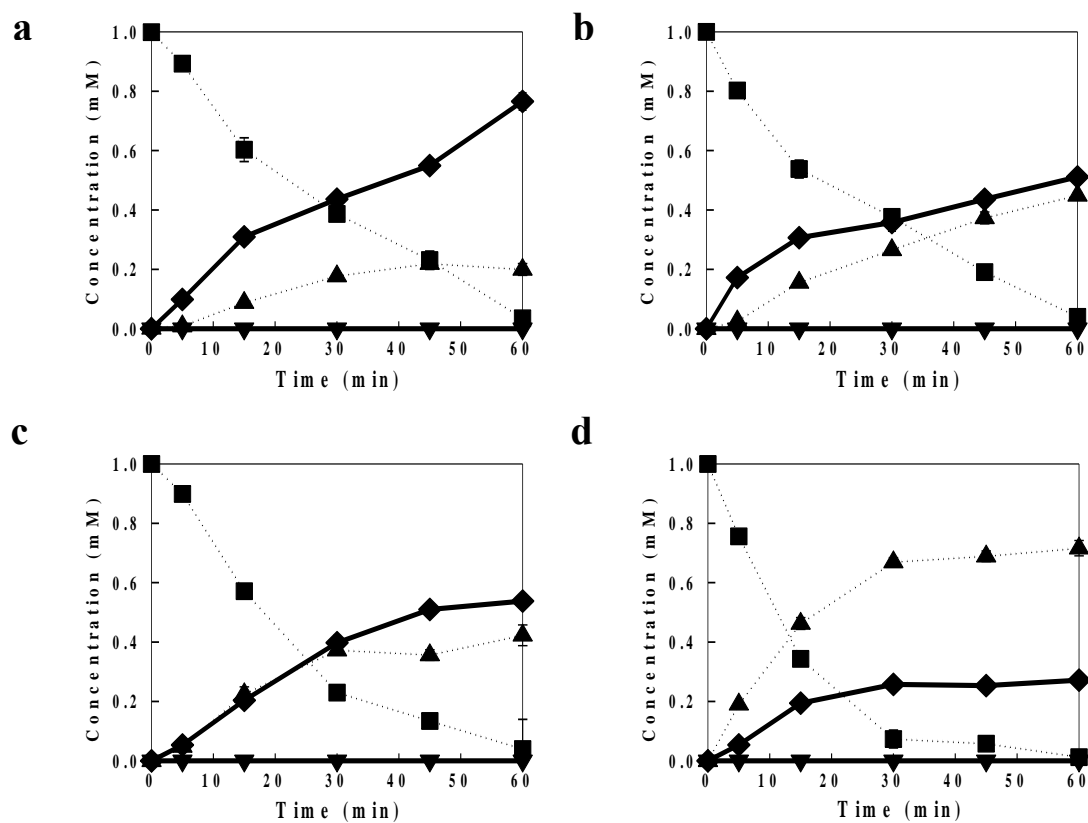

**Supplementary Figure 58. Biotransformation of hydroperoxy fatty acids to hepxilins by recombinant *Escherichia coli*.** The reactions were performed in 50 mM 4-(2-hydroxyethyl)piperazinyl-1-propanesulphonic acid (EPPS) (pH 8.5) buffer containing 1 mM substrate and 3.6 g L<sup>-1</sup> cells at 30°C for 60 min. **(a)** Biotransformation of 12-hydroperoxyeicosatetraenoic acid (12-HpETE) to HXB<sub>3</sub> by recombinant *E. coli* expressing 12-LOX. **(b)** Biotransformation of 12-hydroperoxyeicosapentaenoic acid (12-HpEPE) to HXB<sub>4</sub> by recombinant *E. coli* expressing 12-LOX. **(c)** Biotransformation of 14-hydroperoxydocosahexaenoic acid (14-HpDoHE) to HXB<sub>5</sub> by recombinant *E. coli* expressing 12-LOX. **(d)** Biotransformation of 11-HpETE to HXD<sub>3</sub> by recombinant *E. coli* expressing 11-LOX. Data represent the means of 3 separate experiments, and error bars represent the standard deviations. The symbols indicate HPFA (■), HFA (▲), HX (◆) and TrX (▼).

**a**

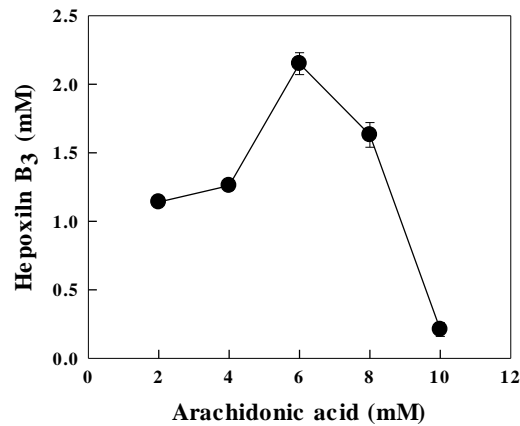

**b**

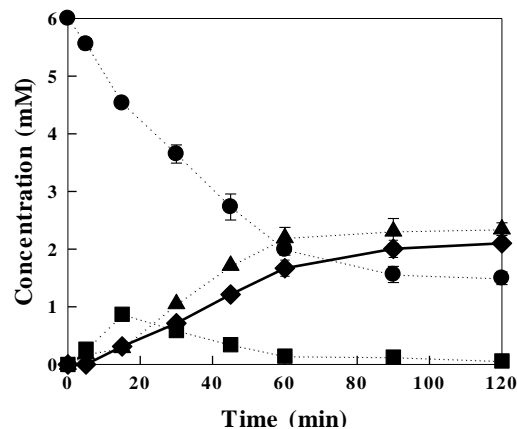

**Supplementary Figure 59. Biotransformation of arachidonic acid to hepoxilin B<sub>3</sub>**

**by recombinant *Escherichia coli*. (a)** Effect of ARA concentration on HXB<sub>3</sub>

production. The reactions by recombinant *E. coli* expressing 12-LOX were performed in 50 mM EPPS (pH 8.5) buffer containing 7.2 g L<sup>-1</sup> cells by varying the concentration of ARA from 2 mM to 10 mM at 30°C for 30 min. **(b)** Time-course reactions for the conversion of ARA to HXB<sub>3</sub>. The reactions by recombinant *E. coli* expressing 12-LOX were performed in 50 mM EPPS (pH 8.5) buffer containing 6 mM ARA and 14.4 g L<sup>-1</sup> cells at 30°C for 120 min. Data represent the means of 3 separate experiments, and error bars represent the standard deviations. The symbols indicate ARA (●), 12-HpETE (■), 12-HETE (▲), HXB<sub>3</sub> (◆).

**a**

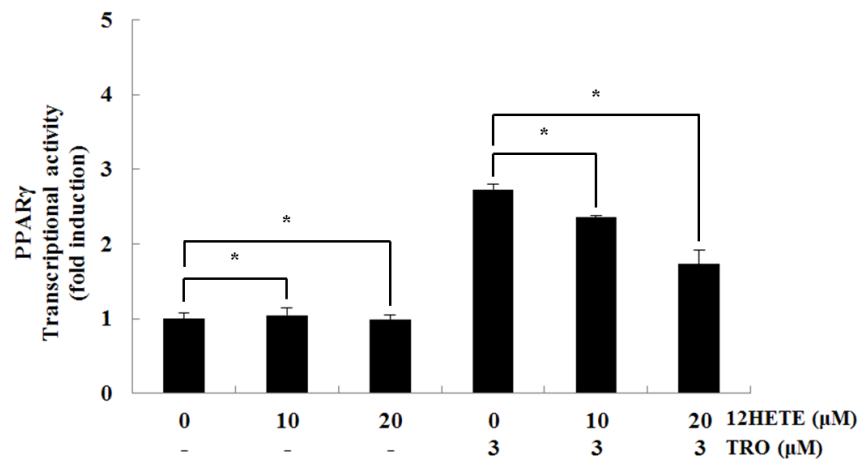

**b**

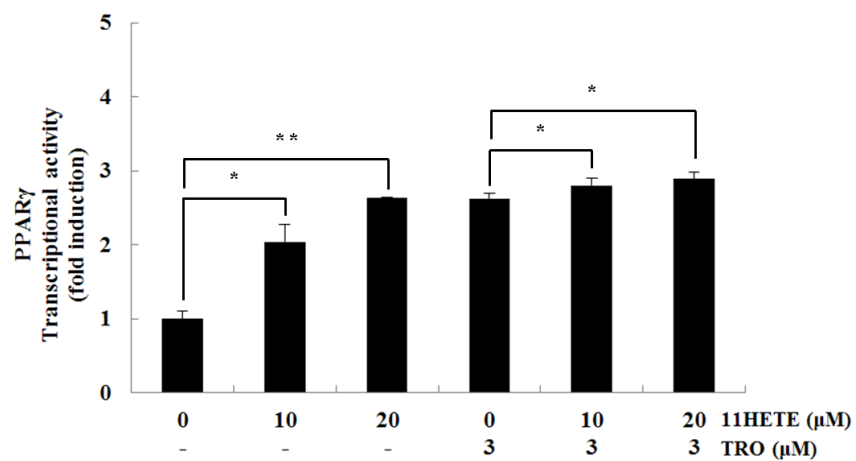

**Supplementary Figure 60. Transcriptional activity of peroxisome proliferator-activated receptor gamma for hydroxy fatty acids.** HEK-293 cells were cultured in a 24-well plate ( $1.0 \times 10^5$  cells per well). After 24 h of incubation, cells were transfected with plasmids expressing peroxisome proliferator-activated receptor gamma (PPAR $\gamma$ ), PPAR response element (PPRE)  $\times$  3-thymidine kinase-luciferase reporter constructs, and the *Renilla* luciferase control vector pRL. After another 24 h, the cells were treated with HFAs and/or 3  $\mu$ M troglitazone for 24 h. The cells were harvested, and the transcriptional activity of PPAR $\gamma$  was determined by a luciferase assay. **(a)** 12-HETE. **(b)** 11-HETE. Data represent the means of 3 separate experiments, and error bars represent the standard deviations. *p*-values are based on *t*-test. \* *p* < 0.05, \*\* *p* < 0.01.

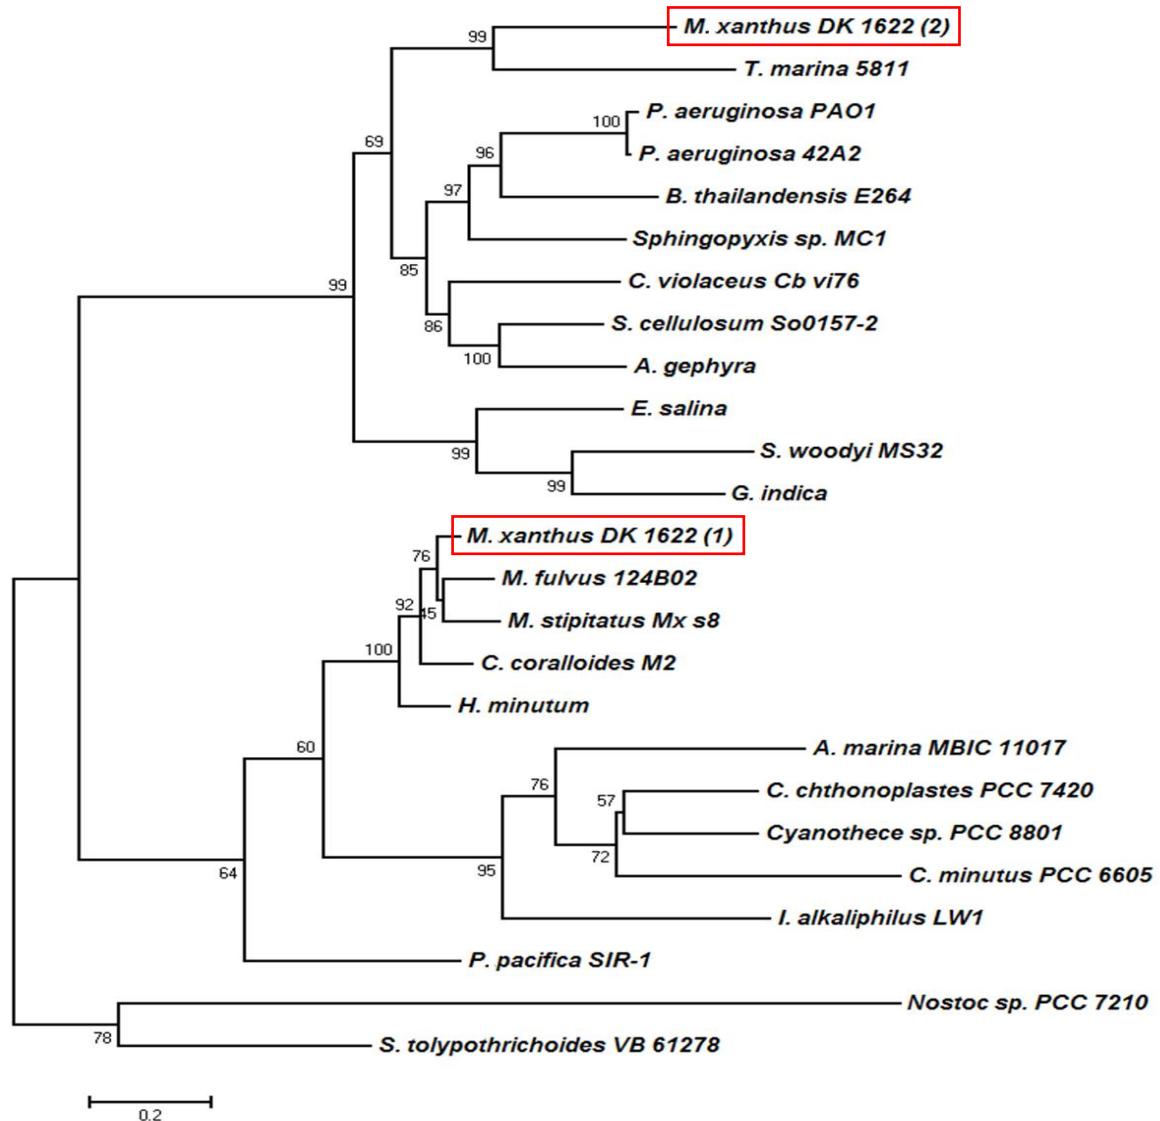

**Supplementary Figure 61. Phylogenetic analysis of the nucleotide sequence of bacterial lipoxigenases.** The phylogenetic analysis was performed using the neighbour-joining method. The optimal sum of the branch length is 9.822258 in the tree. The percentage of replicate trees in which the associated taxa clustered together in the bootstrap test (1,000 replicates) is shown next to the branches. The evolutionary distances are calculated using the maximum composite likelihood method and are expressed as the number of base substitutions per site. The analysis involved 25 nucleotide sequences. All positions containing gaps and missing data were eliminated. There were 1,039 positions in the final dataset. Evolutionary analyses were conducted in MEGA6. Accession numbers of LOXs and full names of strains are included in **Supplementary Table 15**.

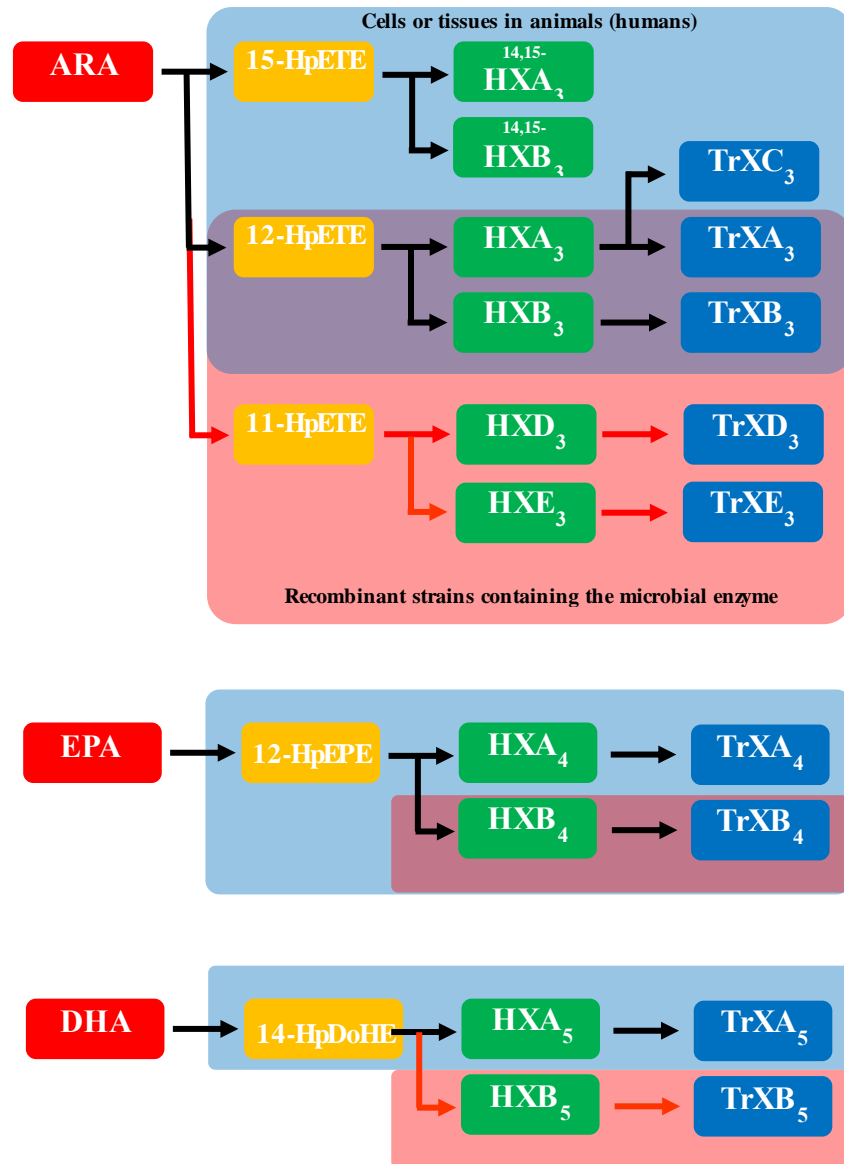

**Supplementary Figure 62. Biosynthetic pathways for trioxilins in this study and published reports.** The symbols indicate the reported pathways (blue box and black line) and new pathways identified in this study (red box and red line).

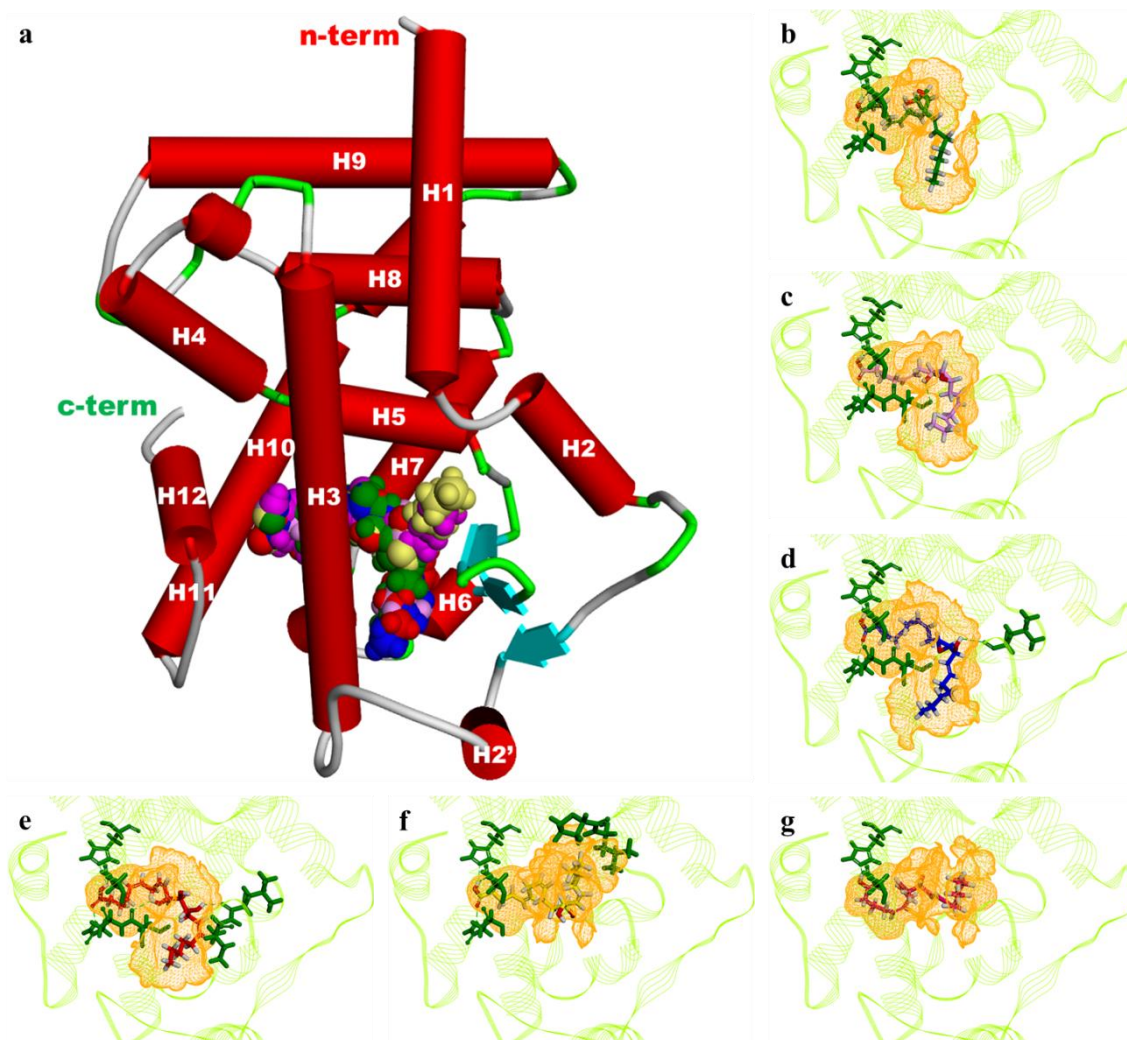

**Supplementary Figure 63. Molecular docking of 6 compounds with ligand-binding domain of human peroxisome proliferator-activated receptor gamma . (A) Docking pose of 6 compounds with LBD of human peroxisome proliferator-activated receptor gamma (PPAR $\gamma$ ), (b) HXB<sub>3</sub>, (c) HXB<sub>4</sub>, (d) HXD<sub>3</sub>, (e) TrXB<sub>3</sub>, (f) TrXD<sub>3</sub>, and (g) 11-HETE. Docking studies to the structure of human PPAR $\gamma$  (hPPAR $\gamma$ ) [PDB 2PRG] were performed in a CDocker module of Discovery Studio 4.1. The structure in orange net is show a hydrophobic pocket, and the amino acids with green of hPPAR $\gamma$  show the residues of hydrogen bonding interaction with molecules. HXB<sub>3</sub>, HXB<sub>4</sub>, HXD<sub>3</sub>, TrXB<sub>3</sub>, TrXD<sub>3</sub>, and 11-HETE are displayed in color with green, pink, blue, red, yellow, and purple, respectively.**



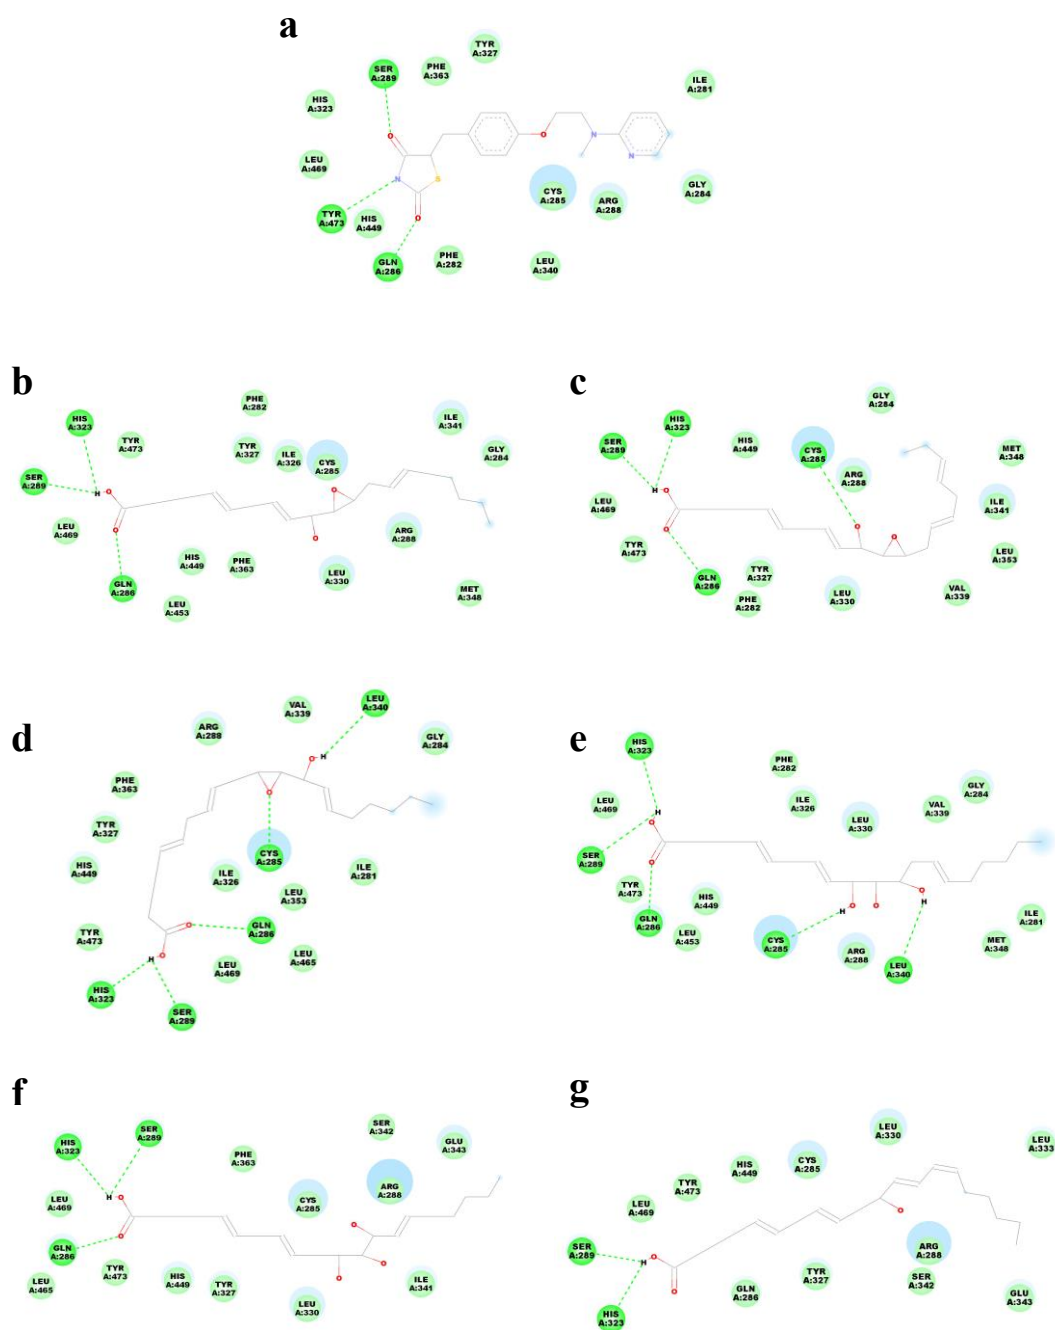

**Supplementary Figure 64. 2D pictures of ligand interaction with human peroxisome proliferator-activated receptor gamma.** The crystal structure of human PPAR $\gamma$  was used 2PGR (PDB). **(a)** Rosiglitazone. **(b)** HXB<sub>3</sub>. **(c)** HXB<sub>4</sub>. **(d)** HXD<sub>3</sub>. **(e)** TrXB<sub>3</sub>. **(f)** TrXD<sub>3</sub>. **(g)** 11-HETE. Residues around ligand molecules represent green ball. Hydrogen bonds represented green dashed line. Blue circles show solvent accessible surface.

**a**

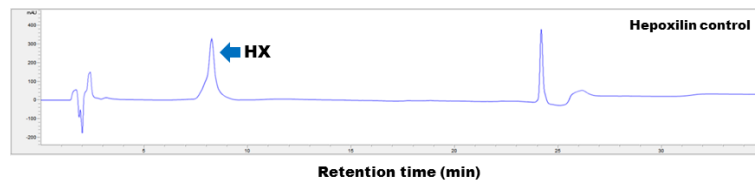

**b**

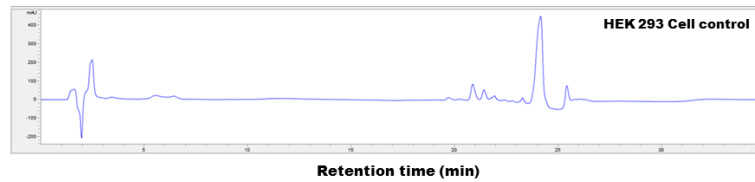

**c**

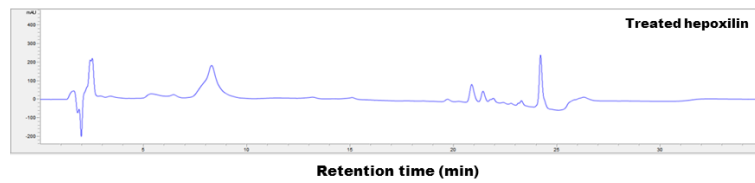

**d**

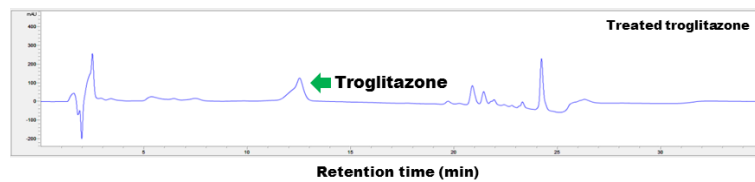

**e**

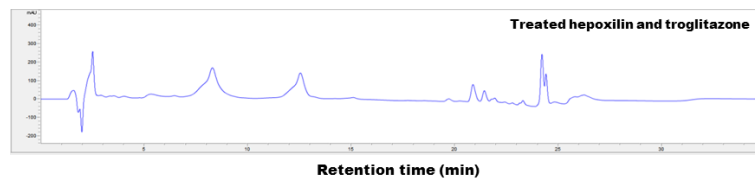

**Supplementary Figure 65. HPLC analysis for the broth of HEK 293 cells with lipid mediator and/or troglitazone.** HEK 293 cells was cultured for 24 h and the broth was analysed. **(a)** Treated HX without HEK 293 cells. **(b)** Only HEK 293 cells. **(c)** Treated HX with HEK 293 cells. **(d)** Treated troglitazone (TRO) with HEK 293 cells. **(e)** Treated HX and TRO with HEK 293 cells. The lipid mediators tested were not metabolized by HEK 293 cells.



**a**

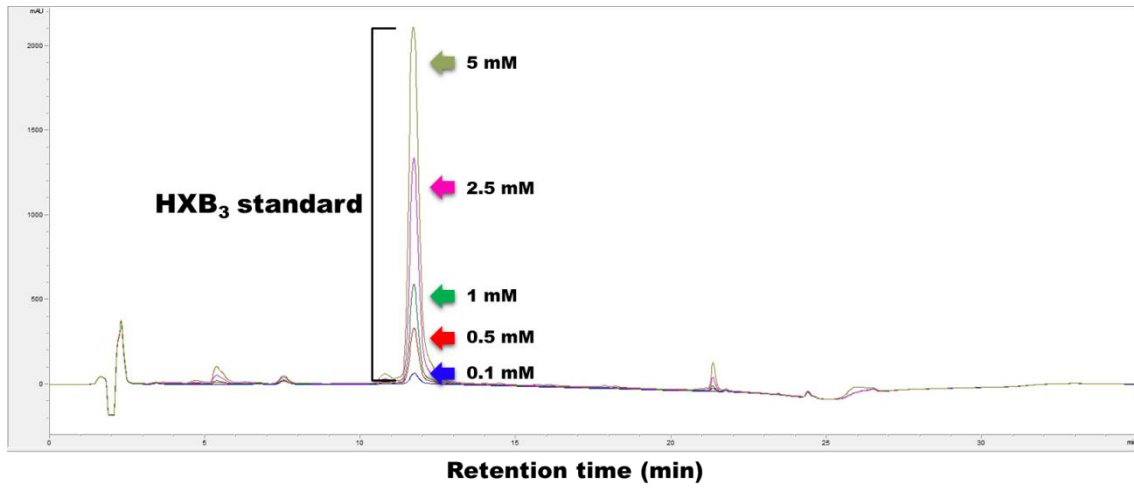

**b**

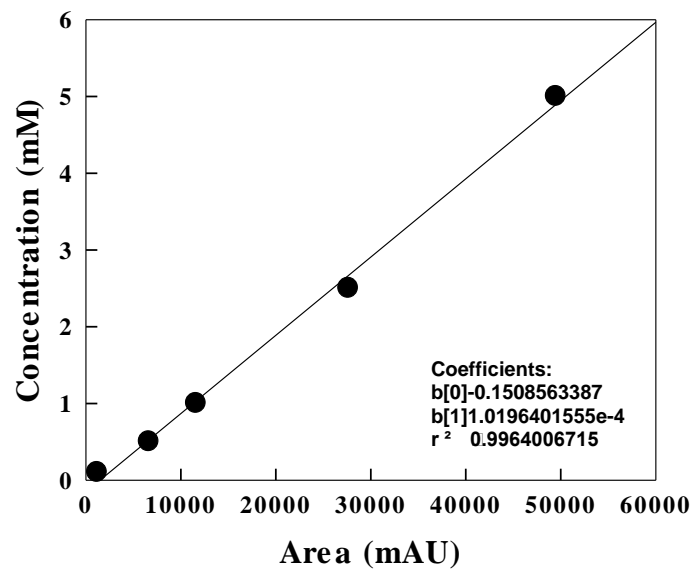

**Supplementary Figure 67. Determination for the concentration of hepoxilin B<sub>3</sub> by HPLC. (a) HPLC analysis of HXB<sub>3</sub> standard at each concentration ranging from 0.1 to 5 mM. (b) Calibration curve of HXB<sub>3</sub> standard between area and concentration.**

**Supplementary Table 1. Abbreviations used in the study.**

---

|        |                                                      |
|--------|------------------------------------------------------|
| ARA    | Arachidonic acid                                     |
| EPA    | Eicosapentaenoic acid                                |
| DHA    | Docosahexaenoic acid                                 |
| HX     | Hepoxilin                                            |
| TrX    | Trioxilin                                            |
| PG     | Prostaglandin                                        |
| LT     | Leukotriene                                          |
| LX     | Lipoxin                                              |
| HFA    | Hydroxy fatty acid                                   |
| HPFA   | Hydro-peroxy fatty acid                              |
| EHFA   | Epoxy-hydroxy fatty acid                             |
| HETE   | Hydroxyeicosatetraenoic acid                         |
| HpETE  | Hydroperoxyeicosatetraenoic acid                     |
| HEPE   | Hydroxypentaenoic acid                               |
| HpEPE  | Hydroperoxypentaenoic acid                           |
| HDoHE  | Hydroxydocosahexaenoic acid                          |
| HpDoHE | Hydroperoxydocosahexaenoic acid                      |
| LOX    | Lipoxygenase                                         |
| COX    | Cyclooxygenase                                       |
| EH     | Epoxide hydrolase                                    |
| LB     | Luria-Bertani                                        |
| EPPS   | 4-(2-Hydroxyethyl)piperazinyl-1-propanesulfonic acid |
| HEK    | human embryonic kidney                               |
| PPAR   | Peroxisome proliferator activated receptor           |
| PPRE   | PPAR response element                                |
| TMZ    | Thiazolidinedione                                    |
| TRO    | Troglitazone                                         |
| LBD    | Ligand binding domain                                |
| NMR    | Nuclear magnetic resonance                           |
| HPLC   | High performance liquid chromatography               |
| LC-MS  | Liquid chromatography-mass spectrometry              |
| MAPS   | Metabolites and pathways strategy                    |

---

**Supplementary Table 2. Classification and chemical names of hepoxilins and trioxilins.**

| Type I                 | Type II | Product                | Chemical name                                             | Reference                                              |            |
|------------------------|---------|------------------------|-----------------------------------------------------------|--------------------------------------------------------|------------|
| A                      | HX      | HXA <sub>3</sub>       | 8-Hydroxy-11,12-epoxyeicosa-5,9,14-trienoic acid          | 1                                                      |            |
|                        |         | HXA <sub>4</sub>       | 8-Hydroxy-11,12-epoxyeicosa-5,10,14,17-tetraenoic acid    | 2                                                      |            |
|                        |         | HXA <sub>5</sub>       | 10-Hydroxy-13,14-epoxydocosa-4,7,11,16,19-pentaenoic acid | 3                                                      |            |
|                        |         | 14,15-HXA <sub>3</sub> | 11-Hydroxy-14,15-epoxyeicosa-5,8,12-trienoic acid         | 4                                                      |            |
|                        | TrX     | TrXA <sub>3</sub>      | 8,11,12-Trihydroxyeicosa-5,9,14-trienoic acid             | 1                                                      |            |
|                        |         | TrXA <sub>4</sub>      | 8,11,12-Trihydroxyeicosa-5,10,14,17-tetraenoic acid       | 2                                                      |            |
|                        |         | TrXA <sub>5</sub>      | 10,13,14-Trihydroxydocosa-4,7,11,16,19-pentaenoic acid    | 3                                                      |            |
|                        | B       | HX                     | HXB <sub>3</sub>                                          | 10-Hydroxy-11,12-epoxyeicosa-5,8,14-trienoic acid      | This study |
|                        |         |                        | HXB <sub>4</sub>                                          | 10-Hydroxy-11,12-epoxyeicosa-5,8,14,17-tetraenoic acid | This study |
| HXB <sub>5</sub>       |         |                        | 12-Hydroxy-13,14-epoxydocosa-4,7,10,16,19-pentaenoic acid | This study                                             |            |
| 14,15-HXB <sub>3</sub> |         |                        | 13-Hydroxy-14,15-epoxyeicosa-5,8,11-trienoic acid         | 4                                                      |            |
| TrX                    |         | TrXB <sub>3</sub>      | 10,11,12-Trihydroxyeicosa-5,8,14-trienoic acid            | This study                                             |            |
|                        |         | TrXB <sub>4</sub>      | 10,11,12-Trihydroxyeicosa-5,8,14,17-tetraenoic acid       | This study                                             |            |
|                        |         | TrXB <sub>5</sub>      | 12,13,14-Trihydroxydocosa-4,7,10,16,19-pentaenoic acid    | This study                                             |            |
| C                      |         | TrX                    | TrXC <sub>3</sub>                                         | 8,9,12-Trihydroxyeicosa-5,10,14-trienoic acid          | 5          |
| D                      |         | HX                     | HXD <sub>3</sub>                                          | 13-Hydroxy-11,12-epoxyeicosa-5,8,14-trienoic acid      | This study |
|                        | TrX     | TrXD <sub>3</sub>      | 11,12,13-Trihydroxyeicosa-5,8,14-trienoic acid            | This study                                             |            |
| E                      | HX      | HXE <sub>3</sub>       | 15-Hydroxy-11,12-epoxyeicosa-5,8,13-trienoic acid         | This study                                             |            |
|                        | TrX     | TrXE <sub>3</sub>      | 11,12,15-Trihydroxyeicosa-5,8,13-trienoic acid            | This study                                             |            |

**Supplementary Table 3. Molecular formulae of arachidonic acid and its metabolites by *Myxococcus xanthus*.**

| Metabolite No | <i>m/z</i> | Retention time (min) | MS/MS fragment masses <sup>1</sup>              | Molecular formula                              | Suggested compounds <sup>2</sup> (Formal name)                               |
|---------------|------------|----------------------|-------------------------------------------------|------------------------------------------------|------------------------------------------------------------------------------|
| 1             | 303.2      | 10.55                | 80.2, 177.1, 205.3, 259.2, 285.1, 303.2         | C <sub>20</sub> H <sub>31</sub> O <sub>2</sub> | ARA                                                                          |
| 2             | 301.2      | 8.47                 | 149.2, 203.2, 229.1, 257.2, 301.2               | C <sub>20</sub> H <sub>29</sub> O <sub>2</sub> | EPA                                                                          |
| 3             | 319.2      | 9.09                 | 167.3, 195.3, 275.2, 301.1, 319.2               | C <sub>20</sub> H <sub>32</sub> O <sub>3</sub> | 11-HETE                                                                      |
| 4             | 319.2      | 9.56                 | 163.1, 179.2, 275.3, 301.1, 319.2               | C <sub>20</sub> H <sub>32</sub> O <sub>3</sub> | 12-HETE                                                                      |
| 5             | 319.3      | 8.36                 | 175.2, 219.1, 275.2, 301.2, 319.3               | C <sub>20</sub> H <sub>32</sub> O <sub>3</sub> | 15-HETE                                                                      |
| 6             | 335.4      | 7.57                 | 153.2, 183.2, 195.2, 263.3, 317.2, 335.4        | C <sub>20</sub> H <sub>32</sub> O <sub>4</sub> | HXB <sub>3</sub>                                                             |
| 7             | 367.5      | 7.44                 | 187.1, 235.2, 289.3, 315.4, 331.4, 333.3, 367.5 | C <sub>20</sub> H <sub>32</sub> O <sub>6</sub> | PGG <sub>2</sub>                                                             |
| 8             | 351.2      | 6.91                 | 189.2, 233.1, 271.2, 299.3, 315.3, 333.3, 351.2 | C <sub>20</sub> H <sub>32</sub> O <sub>5</sub> | PGH <sub>2</sub>                                                             |
| 9             | 335.2      | 8.12                 | 97.1, 127.3, 167.2, 209.2, 317.2, 335.2         | C <sub>20</sub> H <sub>32</sub> O <sub>4</sub> | No match <sup>3</sup> (HX analogue)                                          |
| 10            | 353.2      | 6.17                 | 139.3, 153.1, 201.2, 242.1, 335.1, 353.1        | C <sub>20</sub> H <sub>33</sub> O <sub>5</sub> | No match (TrX analogue)                                                      |
| 11            | 351.2      | 6.31                 | 113.2, 175.1, 189.1, 235.2, 271.2, 315.2, 351.2 | C <sub>20</sub> H <sub>32</sub> O <sub>5</sub> | No match (PGE <sub>2</sub> , PGD <sub>2</sub> , TXA <sub>2</sub> )           |
| 12            | 333.2      | 5.89                 | 113.2, 175.8, 189.2, 271.3, 315.1, 333.2        | C <sub>20</sub> H <sub>29</sub> O <sub>4</sub> | No match (PGA <sub>2</sub> , PGB <sub>2</sub> , PGJ <sub>2</sub> , 12-HpEPE) |

<sup>1</sup>Metabolites were analysed by HPLC and LC-MS/MS at 202 nm.

<sup>2</sup>Products were compared with the references in LIPID MAPS database (<http://lipidmaps.org>).

<sup>3</sup>No match means that the compound is not correctly identified.

**Supplementary Table 4. Candidate biosynthetic genes of lipid mediators in *Myxococcus xanthus* genome.**

| Target enzyme <sup>1</sup> | Template gene   | Entry  | Protein name                       | Gene name        | Identity (%) <sup>2</sup> | Length (bp) | Expression | Activity |
|----------------------------|-----------------|--------|------------------------------------|------------------|---------------------------|-------------|------------|----------|
| LOX                        | P18054 (ALOX12) | Q1DBH9 | Lipoxygenase family protein        | <i>MXAN_1744</i> | 30.0                      | 2028        | ○          | ○        |
|                            |                 | Q1DBH8 | Uncharacterized protein            | <i>MXAN_1745</i> | 15.2                      | 2148        | ○          | ○        |
| EH                         | P34913 (EPHX2)  | Q1DBS7 | Putative epoxide hydrolase         | <i>MXAN_1644</i> | 20.9                      | 957         | ○          | ○        |
|                            | P09960 (LTA4H)  | Q1D232 | Peptidase M1                       | <i>MXAN_5137</i> | 36.4                      | 1755        | ○          | ×        |
| COX                        | P35354 (PTGS2)  | Q1D1V4 | Peroxidase family protein          | <i>MXAN_5217</i> | 18.5                      | 1995        | ○          | ○        |
| TXA synthase               | P24557 (TBXAS1) | Q1DEH2 | Cytochrome P450 family protein     | <i>MXAN_0683</i> | 21.2                      | 1404        | ○          | ×        |
|                            |                 | Q1D9Z9 | Cytochrome P450 family protein     | <i>MXAN_2304</i> | 20.1                      | 1377        | ○          | ×        |
| PGD synthase               | O60760 (HPGDS)  | Q1D6B3 | Putative glutathione S-transferase | <i>MXAN_3623</i> | 24.3                      | 687         | ○          | ×        |

<sup>1</sup>Genes were selected based on sequence alignments with human corresponding enzymes.

<sup>2</sup>Identity means the sequence similarity with human corresponding enzymes.



**Supplementary Table 5. Specific activities of enzymes in *Myxococcus xanthus*.**

| Enzyme                         | Substrate        | Product           | Specific activity ( $\mu\text{mol min}^{-1} \text{mg}^{-1}$ ) <sup>1</sup> |
|--------------------------------|------------------|-------------------|----------------------------------------------------------------------------|
| 12-LOX<br>( <i>MXAN 1745</i> ) | ARA              | 12-HpETE          | 605 $\pm$ 1.7                                                              |
|                                |                  | HXB <sub>3</sub>  | 59.6 $\pm$ 0.2                                                             |
|                                | EPA              | 12-HpEPE          | 134 $\pm$ 3.9                                                              |
|                                |                  | HXB <sub>4</sub>  | 35.6 $\pm$ 0.1                                                             |
|                                | DHA              | 14-HpDoHE         | 112 $\pm$ 2.7                                                              |
|                                |                  | HXB <sub>5</sub>  | 34.3 $\pm$ 0.1                                                             |
|                                | 12-HpETE         | HXB <sub>3</sub>  | 74.1 $\pm$ 0.1                                                             |
|                                | 12-HpEPE         | HXB <sub>4</sub>  | 42.6 $\pm$ 0.2                                                             |
|                                | 14-HpDoHE        | HXB <sub>5</sub>  | 66.8 $\pm$ 0.3                                                             |
| 11-LOX<br>( <i>MXAN 1744</i> ) | ARA              | 11-HpETE          | 489 $\pm$ 1.8                                                              |
|                                |                  | HXD <sub>3</sub>  | 29.3 $\pm$ 0.1                                                             |
|                                | EPA              | 11-HpEPE          | 136 $\pm$ 3.9                                                              |
|                                | DHA              | 14-HpDoHE         | 91.6 $\pm$ 3.4                                                             |
|                                | 11-HpETE         | HXD <sub>3</sub>  | 46.8 $\pm$ 0.6                                                             |
| EH<br>( <i>MXAN 1644</i> )     | HXB <sub>3</sub> | TrXB <sub>3</sub> | 1,403 $\pm$ 5.4                                                            |
|                                | HXB <sub>4</sub> | TrXB <sub>4</sub> | 985 $\pm$ 12.9                                                             |
|                                | HXB <sub>5</sub> | TrXB <sub>5</sub> | 793 $\pm$ 8.4                                                              |
|                                | HXD <sub>3</sub> | TrXD <sub>3</sub> | 1,158 $\pm$ 3.8                                                            |

<sup>1</sup>Data represent the means of three separate experiments, and  $\pm$  represent the standard deviations.

**Supplementary Table 6. 1D NMR data of hepoxilin B<sub>3</sub>.**

| #  | <sup>1</sup> H (δ) | multiplet | J (Hz)      | Protons | <sup>13</sup> C (δ) |
|----|--------------------|-----------|-------------|---------|---------------------|
| 1  |                    |           |             |         | 174.3               |
| 2  | 2.20               | t         | 6.44        | 2H      | 33.0                |
| 3  | 1.54               | tt        | 7.11        | 2H      | 24.4                |
|    |                    |           | 6.44        |         |                     |
| 4  | 2.03               | td        | 7.11        | 2H      | 26.1                |
|    |                    |           | 6.52        |         |                     |
| 5  | 5.34               | m         |             | 1H      | 129.4               |
| 6  | 5.36               | m         |             | 1H      | 128.1               |
| 7  | 2.77               | m         |             | 2H      | 25.8                |
| 8  | 5.37               | m         |             | 1H      | 129.5               |
| 9  | 5.36               | m         |             | 1H      | 129.5               |
| 10 | 4.07               | dd        | 7.65, 6.03  | 1H      | 67.1                |
| 11 | 2.71               | dd        | 6.03, 2.17  | 1H      | 60.7                |
| 12 | 2.82               | td        | 5.43, 2.17  | 1H      | 54.7                |
| 13 | 2.29               | m         |             | 1H      | 29.0                |
|    | 2.17               |           |             | 1H      |                     |
| 14 | 5.33               | m         |             | 1H      | 123.8               |
| 15 | 5.47               | dt        | 10.89, 5.43 | 1H      | 132.3               |
| 16 | 1.96               | dt        | 7.10, 7.05  | 2H      | 26.7                |
| 17 | 1.30               | m         |             | 2H      | 28.9                |
| 18 | 1.25               | m         |             | 2H      | 30.8                |
| 19 | 1.25               | m         |             | 2H      | 21.9                |
| 20 | 0.86               | t         | 6.88        | 3H      | 13.9                |

**Supplementary Table 7. 1D NMR data of hepoxilin B<sub>4</sub>.**

| #  | <sup>1</sup> H (δ) | multiplet | J (Hz)     | Protons | <sup>13</sup> C (δ) |
|----|--------------------|-----------|------------|---------|---------------------|
| 1  |                    |           |            |         | 174.3               |
| 2  | 2.20               | t         | 7.41       | 2H      | 33.1                |
| 3  | 1.54               | tt        | 7.41, 7.02 | 2H      | 24.4                |
| 4  | 2.04               | dt        | 6.55, 7.02 | 2H      | 26.1                |
| 5  | 5.36               | m         |            | 1H      | 129.4               |
| 6  | 5.33               | m         |            | 1H      | 128.1               |
| 7  | 2.77               | m         |            | 2H      | 25.8                |
| 8  | 5.36               | m         |            | 1H      | 129.5               |
| 9  | 5.36               | m         |            | 1H      | 129.5               |
| 10 | 4.08               | dd        | 7.63, 6.00 | 1H      | 67.1                |
| 11 | 2.72               | dd        | 6.00, 2.20 | 1H      | 60.7                |
| 12 | 2.84               | td        | 8.15, 2.20 | 1H      | 54.5                |
| 13 | 2.32               | m         |            | 1H      | 29.0                |
|    | 2.21               | m         |            | 1H      |                     |
| 14 | 5.33               | m         |            | 1H      | 124.0               |
| 15 | 5.44               | m         |            | 1H      | 130.4               |
| 16 | 2.74               | dd        | 6.68, 6.62 | 1H      | 25.2                |
| 17 | 5.27               | m         |            | 1H      | 126.8               |
| 18 | 5.36               | m         |            | 1H      | 131.6               |
| 19 | 2.03               | dt        | 6.95, 7.53 | 2H      | 20.0                |
| 20 | 0.91               | t         | 7.53       | 3H      | 14.1                |

**Supplementary Table 8. 1D NMR data of hepoxilin B<sub>5</sub>.**

| #  | <sup>1</sup> H (δ) | multiplet | J (Hz)       | Protons | <sup>13</sup> C (δ) |
|----|--------------------|-----------|--------------|---------|---------------------|
| 1  |                    |           |              |         | 174.2               |
| 2  | 2.20               | t         | 6.93         | 2H      | 34.2                |
| 3  | 2.24               | dt        | 6.93         | 2H      | 22.7                |
| 4  | 5.38               | m         |              | 1H      | 128.9               |
| 5  | 5.39               | m         |              | 1H      | 128.3               |
| 6  | 2.78               | m         |              | 2H      | 25.2                |
| 7  | 5.32               | m         |              | 1H      | 128.1               |
| 8  | 5.30               | m         |              | 1H      | 129.7               |
| 9  | 2.78               | m         |              | 2H      | 25.2                |
| 10 | 5.39               | m         |              | 1H      | 129.6               |
| 11 | 5.36               | m         |              | 1H      | 129.4               |
| 12 | 4.09               | dd        | 5.95<br>8.34 | 1H      | 67.1                |
| 13 | 2.72               | dd        | 2.02<br>5.95 | 1H      | 60.7                |
| 14 | 2.84               | m         |              | 1H      | 54.8                |
| 15 | 2.32               | m         |              | 1H      | 29.0                |
|    | 2.21               | m         |              | 1H      |                     |
| 16 | 5.33               | m         |              | 1H      | 124.0               |
| 17 | 5.43               | m         |              | 1H      | 130.4               |
| 18 | 2.74               | t         | 7.16         | 2H      | 25.2                |
| 19 | 5.27               | m         |              | 1H      | 126.9               |
| 20 | 5.36               | m         |              | 1H      | 131.6               |
| 21 | 2.02               | dt        | 7.03<br>7.52 | 2H      | 20.0                |
| 22 | 0.92               | t         | 7.52         | 3H      | 14.1                |

**Supplementary Table 9. 1D NMR data of hepoxilin D<sub>3</sub>.**

| #  | <sup>1</sup> H (δ) | multiplet | J (Hz)     | Protons | <sup>13</sup> C (δ) |
|----|--------------------|-----------|------------|---------|---------------------|
| 1  |                    |           |            |         | 174.3               |
| 2  | 2.20               | t         | 6.38       | 2H      | 33.0                |
| 3  | 1.54               | tt        | 6.38       | 2H      | 24.4                |
|    |                    |           | 7.08       |         |                     |
| 4  | 2.04               | dt        | 7.08       | 2H      | 26.0                |
|    |                    |           | 5.74       |         |                     |
| 5  | 5.33               | m         |            | 1H      | 129.2               |
| 6  | 5.33               | m         |            | 1H      | 128.1               |
| 7  | 2.74               | dd        | 5.72, 4.17 | 2H      | 25.2                |
| 8  | 5.42               | m         |            | 1H      | 130.3               |
| 9  | 5.33               | m         |            | 1H      | 124.0               |
| 10 | 2.33               | m         |            | 1H      | 29.2                |
|    | 2.20               | m         |            | 1H      |                     |
| 11 | 2.81               | dt        | 2.15, 5.42 | 1H      | 54.6                |
| 12 | 2.70               | dd        | 2.15, 6.11 | 1H      | 60.8                |
| 13 | 4.00               | ddd       | 8.63, 6.11 | 1H      | 67.2                |
| 14 | 5.43               | m         |            | 1H      | 131.5               |
| 15 | 5.33               | m         |            | 1H      | 129.6               |
| 16 | 1.99               | dt        | 4.36, 6.84 | 2H      | 26.02               |
| 17 | 1.32-1.2           | m         |            | 2H      | 31.09               |
| 18 | 1.32-1.2           | m         |            | 2H      | 30.83               |
| 19 | 1.32-1.2           | m         |            | 2H      | 21.93               |
| 20 | 0.85               | t         | 7.04       | 3H      | 13.82               |

**Supplementary Table 10. 1D NMR data of trioxilin B<sub>3</sub>.**

| #  | <sup>1</sup> H (δ) | multiplet | J (Hz)     | Protons | <sup>13</sup> C (δ) |
|----|--------------------|-----------|------------|---------|---------------------|
| 1  |                    |           |            |         | 174.5               |
| 2  | 2.19               | t         | 7.35       | 2H      | 33.7                |
| 3  | 1.54               | tt        | 7.20, 7.35 | 2H      | 24.5                |
| 4  | 2.04               | dt        | 7.20,      | 2H      | 26.52               |
| 5  | 5.35               | m         |            | 1H      | 128.4               |
| 6  | 5.34               | m         |            | 1H      | 128.4               |
| 7  | 2.83               | m         |            | 1H      | 25.7                |
|    | 2.73               |           |            | 1H      |                     |
| 8  | 5.30               | m         |            | 1H      | 127.8               |
| 9  | 5.51               | m         |            | 1H      | 132.2               |
| 10 | 4.50               | dd        | 8.75, 2.92 | 1H      | 65.7                |
| 11 | 3.03               | dd        | 7.27, 2.92 | 1H      | 76.9                |
| 12 | 3.44               | dd        | 7.27, 8.35 | 1H      | 70.5                |
| 13 | 2.35               | m         |            | 1H      | 31.0                |
|    | 2.04               |           |            | 1H      |                     |
| 14 | 5.48               | m         |            | 1H      | 127.4               |
| 15 | 5.38               | m         |            | 1H      | 130.2               |
| 16 | 1.98               | m         |            | 2H      | 26.6                |
| 17 | 1.30               | m         |            | 2H      | 29.0                |
| 18 | 1.25               | m         |            | 2H      | 30.9                |
| 19 | 1.27               | m         |            | 2H      | 22.0                |
| 20 | 0.86               | t         | 6.82       | 3H      | 13.9                |

**Supplementary Table 11. 1D NMR data of trioxilin B<sub>4</sub>.**

| #  | <sup>1</sup> H (δ) | multiplet | J (Hz)              | Protons | <sup>13</sup> C (δ) |
|----|--------------------|-----------|---------------------|---------|---------------------|
| 1  |                    |           |                     |         | 176.3               |
| 2  | 1.96               | m         |                     | 2H      | 35.8                |
| 3  | 1.49               | m         |                     | 2H      | 25.8                |
| 4  | 2.00               | m         |                     | 2H      | 26.62               |
| 5  | 5.32               | m         |                     | 1H      | 129.7               |
| 6  | 5.32               | m         |                     | 1H      | 127.5               |
| 7  | 2.98               | dt        | 15.4, 7.32          | 1H      | 25.9                |
|    | 2.87               | dt        | 15.4, 7.32          | 1H      |                     |
| 8  | 5.31               | m         |                     | 1H      | 127.07              |
| 9  | 5.51               | dd        | 9.49, 9.25          | 1H      | 131.9               |
| 10 | 4.63               |           | 8.74, 1.57          | 1H      | 64.4                |
| 11 | 2.89               |           | 8.16, 1.57          | 1H      | 77.5                |
| 12 | 3.47               | ddd       | 8.38, 8.16,<br>2.77 | 1H      | 70.0                |
| 13 | 2.40               | ddd       | 14.72,              | 1H      | 31.0                |
|    | 2.02               | m         | 6.94, 2.77          | 1H      |                     |
| 14 | 5.52               | m         |                     | 1H      | 128.2               |
| 15 | 5.31               | m         |                     | 1H      | 127.9               |
| 16 | 2.75               | dd        | 5.6,<br>7.2         | 2H      | 25.4                |
| 17 | 5.29               | m         |                     | 1H      | 127.5               |
| 18 | 5.34               | m         |                     | 1H      | 131.2               |
| 19 | 2.03               | dt        | 6.89,<br>7.52       | 2H      | 20.0                |
| 20 | 0.92               | t         | 7.52                | 3H      | 14.2                |

**Supplementary Table 12. 1D NMR data of trioxilin B<sub>5</sub>.**

| #  | <sup>1</sup> H (δ) | multiplet | J (Hz)              | Protons | <sup>13</sup> C (δ) |
|----|--------------------|-----------|---------------------|---------|---------------------|
| 1  |                    |           |                     |         | 174.3               |
| 2  | 2.21               | t         | 6.45                | 2H      | 34.33               |
| 3  | 2.25               | dt        | 6.45                | 2H      | 22.7                |
| 4  | 5.35               | m         |                     | 1H      | 128.7               |
| 5  | 5.33               | m         |                     | 1H      | 128.3               |
| 6  | 2.8                | dd        |                     | 2H      | 25.1                |
| 7  | 5.33               | m         |                     | 1H      | 128.0               |
| 8  | 5.33               | m         |                     | 1H      | 127.8               |
| 9  | 2.88               | m         |                     | 1H      | 25.7                |
|    | 2.78               |           |                     | 1H      |                     |
| 10 | 5.32               | m         |                     | 1H      |                     |
| 11 | 5.53               | m         |                     | 1H      | 132.1               |
| 12 | 4.53               | dd        | 8.89, 2.25          | 1H      | 65.6                |
| 13 | 3.04               | dd        | 7.49, 2.25          | 1H      | 76.9                |
| 14 | 3.47               | ddd       | 2.74, 7.49,<br>8.19 | 1H      | 70.4                |
| 15 | 2.38               | m         |                     | 1H      | 31.0                |
|    | 2.06               |           |                     | 1H      |                     |
| 16 | 5.50               | m         |                     | 1H      | 127.6               |
| 17 | 5.33               | m         |                     | 1H      | 128.3               |
| 18 | 2.75               | dd        |                     | 2H      | 25.3                |
| 19 | 2.29               | m         |                     | 1H      | 127.4               |
| 20 | 5.34               | m         |                     | 1H      | 131.3               |
| 21 | 2.03               | dt        | 6.82, 7.53          | 2H      | 20.0                |
| 22 | 0.92               | t         | 7.53                | 3H      | 14.1                |



**Supplementary Table 13. 1D NMR data of trioxilin D<sub>3</sub>.**

| #  | <sup>1</sup> H (δ) | multiplet | J (Hz)     | Protons | <sup>13</sup> C (δ) |
|----|--------------------|-----------|------------|---------|---------------------|
| 1  |                    |           |            |         | 174.7               |
| 2  | 2.17               | t         | 7.22       | 2H      | 33.5                |
| 3  | 1.53               | tt        | 6.36, 7.22 | 2H      | 24.7                |
| 4  | 2.03               | m         |            | 2H      | 26.1                |
| 5  | 5.33               | m         |            | 1H      | 129.0               |
| 6  | 5.33               | m         |            | 1H      | 128.6               |
| 7  | 2.74               | m         |            | 2H      | 25.4                |
| 8  | 5.33               | m         |            | 1H      | 128.3               |
| 9  | 5.49               | m         |            | 1H      | 127.6               |
| 10 | 2.38               | m         |            | 1H      | 30.9                |
|    | 2.06               | m         |            | 1H      |                     |
| 11 | 3.32               | td        | 7.27, 2.97 | 1H      | 71.5                |
| 12 | 3.26               | dd        | 4.62, 7.27 | 1H      | 76.7                |
| 13 | 4.35               | dd        | 7.52, 4.62 | 1H      | 67.7                |
| 14 | 5.40               | dd        |            | 1H      | 130.5               |
| 15 | 5.40               | m         |            | 1H      | 131.1               |
| 16 | 2.07               | m         |            | 1H      | 27.3                |
|    | 2.01               | m         |            | 1H      |                     |
| 17 | 1.31               | m         |            | 2H      | 28.8                |
| 18 | 1.25               | m         |            | 2H      | 31.0                |
| 19 | 1.27               | m         |            | 2H      | 22.0                |
| 20 | 0.86               | t         | 6.86       | 3H      | 13.9                |

**Supplementary Table 14. 1D NMR data of trioxilin E<sub>3</sub>.**

| #  | <sup>1</sup> H (δ) | multiplet | J (Hz)      | Protons | <sup>13</sup> C (δ) |
|----|--------------------|-----------|-------------|---------|---------------------|
| 1  |                    |           |             |         | 175                 |
| 2  | 2.10               | t         | 7.03        | 2H      | 34.4                |
| 3  | 1.50               | tt        | 6.04, 7.03  | 2H      | 25.1                |
| 4  | 2.02               | m         |             | 2H      | 26.4                |
| 5  | 5.31               | m         |             | 1H      | 129.3               |
| 6  | 5.31               | m         |             | 1H      | 128.4               |
| 7  | 2.74               | m         |             | 1H      | 25.5                |
|    | 2.71               | m         |             | 1H      |                     |
| 8  | 5.31               | m         |             | 1H      | 128.4               |
| 9  | 5.44               | m         |             | 1H      | 127.6               |
| 10 | 2.19               | m         |             | 1H      | 30.3                |
|    | 2.05               | m         |             | 1H      |                     |
| 11 | 3.29               | m         | 4.53        | 1H      | 74.2                |
| 12 | 3.81               | dd        | 4.53, 5.36  | 1H      | 74.2                |
| 13 | 5.61               | dd        | 15.78, 5.36 | 1H      | 129.8               |
| 14 | 5.55               | dd        | 15.78, 6.23 | 1H      | 134.5               |
| 15 | 3.89               | m         |             | 1H      | 70.6                |
| 16 | 1.37               | m         |             | 1H      | 37.4                |
|    | 1.33               | m         |             | 1H      |                     |
| 17 | 1.30               | m         |             | 1H      | 24.8                |
|    | 1.23               | m         |             | 1H      |                     |
| 18 | 1.22               | m         |             | 2H      | 31.4                |
| 19 | 1.25               | m         |             | 2H      | 22.2                |
| 20 | 0.85               | t         | 7.09        | 3H      | 14.0                |

**Supplementary Table 15. Bacteria containing lipoxygenase and their GenBank accession numbers.**

| No                           | Organism <sup>1</sup>                          | Taxonomic           | GenBank <sup>2</sup> | Gene                    | protein                          | length | Reference  |
|------------------------------|------------------------------------------------|---------------------|----------------------|-------------------------|----------------------------------|--------|------------|
| <b>Phylum proteobacteria</b> |                                                |                     |                      |                         |                                  |        |            |
| 1                            | <i>Sphingopyxis</i> sp. MC1                    | Alphaproteobacteria | ENY83021.1.          | <i>EBMC1_02935</i>      | Arachidonate 15-lipoxygenase     | 664    |            |
| 2                            | <i>Burkholderia thailandensis</i> E264         | Betaproteobacteria  | ABC36974.1.          | <i>BTH_12353</i>        | Arachidonate 15-lipoxygenase     | 695    | 6          |
| 3                            | <i>Shewanella woody</i> MS32                   | Gammaproteobacteria | ACA87192.1.          | <i>Swoo_2919</i>        | Arachidonate 15-lipoxygenase     | 725    |            |
| 4                            | <i>Pseudomonas aeruginosa</i> PAO1             | Gammaproteobacteria | AAG04558.1.          | <i>loxA</i>             | Arachidonate 15-lipoxygenase     | 685    | 7          |
| 5                            | <i>Pseudomonas aeruginosa</i> 42A2             | Gammaproteobacteria | AAL85880.2.          | <i>lox</i>              | Linoleate 9/13-lipoxygenase      | 685    | 8          |
| 6                            | <i>Grimontia indica</i>                        | Gammaproteobacteria | EOD80348.1.          | <i>D515_00636</i>       | Arachidonate 15-lipoxygenase     | 723    |            |
| 7                            | <i>Thiocapsa marina</i> 5811                   | Gammaproteobacteria | EGV20546.1.          | <i>ThimaDRAFT_0324</i>  | Arachidonate 15-lipoxygenase     | 962    |            |
| 8                            | <i>Myxococcus xanthus</i> DK 1622 (1)          | Deltaproteobacteria | ABF88826.1.          | <i>MXAN 1744</i>        | Lipoxygenase family protein      | 675    | This study |
| 9                            | <i>Myxococcus xanthus</i> DK 1622 (2)          | Deltaproteobacteria | ABF86480.1.          | <i>MXAN 1745</i>        | Arachidonate 12 lipoxygenase     | 715    | This study |
| 10                           | <i>Myxococcus stipitatus</i> Mx s8             | Deltaproteobacteria | AGC43896.1.          | <i>MYSTI_02580</i>      | Uncharacterized protein          | 690    |            |
| 11                           | <i>Coralloccoccus coralloides</i> M2           | Deltaproteobacteria | AFE04785.1.          | <i>COCOR_02732</i>      | Uncharacterized protein          | 687    |            |
| 12                           | <i>Plesiocystis pacifica</i> SIR-1             | Deltaproteobacteria | EDM80093.1.          | <i>PPSIR1_20739</i>     | Uncharacterized protein          | 651    |            |
| 13                           | <i>Myxococcus fulvus</i> 124B02                | Deltaproteobacteria | AKF85636.1.          | <i>MFUL124B02_14095</i> | Uncharacterized protein          | 689    |            |
| 14                           | <i>Hyalangium minutum</i>                      | Deltaproteobacteria | KFE67541.1.          | <i>DB31_8024</i>        | Uncharacterized protein          | 688    |            |
| 15                           | <i>Enhygromyxa salina</i>                      | Deltaproteobacteria | KIG12340.1.          | <i>DB30_01572</i>       | Arachidonate 15-lipoxygenase     | 713    |            |
| 16                           | <i>Sorangium cellulosum</i> So0157-2           | Deltaproteobacteria | AGP37954.1.          | <i>SCE1572_27890</i>    | Uncharacterized protein          | 673    |            |
| 17                           | <i>Archangium gephyra</i>                      | Deltaproteobacteria | AKI99209.1.          | <i>AA314_00836</i>      | Arachidonate 15-lipoxygenase     | 680    |            |
| 18                           | <i>Cystobacter violaceus</i> Cbvi76            | Deltaproteobacteria | KFA92210.1.          | <i>Q664_16870</i>       | Uncharacterized protein          | 656    |            |
| <b>Phylum cyanobacteria</b>  |                                                |                     |                      |                         |                                  |        |            |
| 19                           | <i>Chamaesiphon minutus</i> PCC 6605           | Cyanobacteria       | AFY92607.1.          | <i>Cha6605_1432</i>     | Lipoxygenase                     | 668    |            |
| 20                           | <i>Cyanothece</i> sp. PCC 8801                 | Cyanobacteria       | ACK66448.1.          | <i>PCC8801_2437</i>     | Linolenate 13-lipoxygenase       | 668    | 9          |
| 21                           | <i>Nostoc</i> sp. PCC 7120                     | Cyanobacteria       | BAB77350.1.          | <i>all8020</i>          | Linolenate 9R-lipoxygenase       | 773    | 10         |
| 22                           | <i>Coleofasciculus chthonoplastes</i> PCC 7420 | Cyanobacteria       | EDX74350.1.          | <i>MC7420_3874</i>      | Putative uncharacterized protein | 656    |            |
| 23                           | <i>Acaryochloris marina</i> MBIC 11017         | Cyanobacteria       | ABW27601.1.          | <i>AM1_2594</i>         | Linolenate 13-lipoxygenase       | 571    | 11         |
| 24                           | <i>Scytonema tolyporthrioides</i> VB-61278     | Cyanobacteria       | KIJ84262.1.          | <i>SD80_04430</i>       | Uncharacterized protein          | 464    |            |
| <b>Phylum Bacteroidetes</b>  |                                                |                     |                      |                         |                                  |        |            |
| 25                           | <i>Indibacter alkaliphilus</i> LW1             | Bacteroidetes       | EOZ99250.1.          | <i>A33Q_0628</i>        | Uncharacterized protein          | 729    |            |

<sup>1</sup>The bacteria grouped as *Proteobacteria*, *Cyanobacteria*, and *Bacteroidetes*.

<sup>2</sup>The GenBank accession numbers of nucleotide sequences of LOXs.

**Supplementary Table 16. Primers used for PCR analysis.**

| Name                  | Restriction enzyme | Sequence                                   |
|-----------------------|--------------------|--------------------------------------------|
| <i>MX 1744-F</i>      | Nde I              | GCC GCA TAT GAC TGT CGAGTACAAAC            |
| <i>MX 1744-R</i>      | Hind III           | TAC AAG CTT TCAGAC GGT GAT GCC G           |
| <i>MX 1745-F</i>      | EcoR I             | GGA TTC ATG AGC GCG AGT GTG A              |
| <i>MX 1745-R</i>      | Not I              | GCG GCC GCT TAG ATATTG ATG C               |
| <i>MX 1644-F</i>      | Nde I              | GCG CAT ATG GCT GAC ATC ACG CAT CGAAC      |
| <i>MX 1644-R</i>      | Hind III           | GCT AAG CTT TCAGGC CGG CAG CTT CTT CA      |
| <i>MX 5137-F</i>      | Nde I              | AAC CAT ATG GCT CGC CTC GAC CCG CA         |
| <i>MX 5137-R</i>      | Hind III           | ACA AAG CTT TCAGGC GCG CGAAAG GAT GA       |
| <i>MX 5217-F</i>      | Nde I              | GCT GAC ATATGG ATG AGATGG AGG GGA CCG TC   |
| <i>MX 5217-R</i>      | Xho I              | GAC TGC TCG AGT CAG TGA AGG AGG CTT CCC G  |
| <i>MX 2304-F</i>      | Nde I              | GGC CAT ATG TCC ATC CAT CCAGCG GGT         |
| <i>MX 2304-R</i>      | Hind I             | ACG AAG CTT TCAGGG CCG CGAGGC G            |
| <i>MX 0683-F</i>      | Nde I              | GCT CAT ATG GTT CGC TCC ACC TGC GCC        |
| <i>MX 0683-R</i>      | Hind 3             | GCA AAG CTT TCATGC TCCCGC CGC ATG          |
| <i>MX 3623-F</i>      | Nde I              | GCG CAT ATG AAC GCT CAATCATCATTG CCG       |
| <i>MX 3623-R</i>      | Hind 3             | GCG AAG CTT TCAGCC GTT GAG GAG CTG GA      |
| <i>MX 1745 Duet-F</i> | EcoR I             | GAT CGAATT CAT GAG CGC GAG TGT GAC CCG GA  |
| <i>MX 1745 Duet-R</i> | Hind III           | GCC GCA AGC TTT TAG ATATTG ATG CGG GAACTGA |
| <i>MX 1744 Duet-F</i> | EcoR I             | GAA TTC ATG ACT GTC GAG TAC AAAC           |
| <i>MX 1744 Duet-R</i> | Hind III           | TAC AAG CTT TCAGAC GGT GAT GCC G           |
| <i>MX 1644 Duet-F</i> | Nde I              | GCG CAT ATG GCT GAC ATC ACG CAT CGAACC GT  |
| <i>MX 1644 Duet-R</i> | Xho I              | GCG CTC GAG TCAGGC CGG CAG CTT CTT CA      |

## Supplementary Notes

**Identification of hydroxy fatty acids, hepoxilins, and trioxilins.** The chemical structures of fragment peaks were analysed by ChemDraw 7.0. The reaction products, hydroxy fatty acids (HFAs), obtained from polyunsaturated fatty acids (PUFAs) using whole recombinant cells expressing 12-LOX or 11-LOX from *M. xanthus* were analysed by LC-MS/MS (**Supplementary Fig. 8**). The total molecular mass of the product (MW=320.2) obtained from arachidonic acid (ARA) by whole recombinant cells expressing 11-LOX or 12-LOX was represented by a peak at  $m/z$  319.2  $[M-H^-]$  (**Supplementary Fig. 8a, b**). The peaks at  $m/z$  167.2 and 197.1 of the 11-LOX derived product were resulted from the cleavage of the hydroxyl group at the C11 position because the chemical formulas of the fragments were  $C_9H_{14}COOH$  and  $C_{10}H_{15}OHCOOH$ , respectively, from the hydroxyl fatty acid (HFA). Thus, these fragment peaks indicated that the compound was an 11-hydroxyeicosatetraenoic acid (11-HETE). The peaks at  $m/z$  179.2 and 208.2 of the 12-LOX derived product from ARA were resulted from the cleavage of the hydroxyl group at the C12 position because the fragments indicated  $C_{10}H_{14}COOH$  and  $C_{11}H_{16}OHCOO^-$ , respectively, from the HFA. These results indicated that the HFA was a 12-HETE. The total molecular mass of the product (MW=318.2) obtained from EPA by whole recombinant cells expressing 11-LOX or 12-LOX was represented by a peak at  $m/z$  317.2 (**Supplementary Fig. 8c, d**). The LC-MS/MS fragments of the 11-LOX derived product fragments showed the peaks at  $m/z$  121.1, 151.2, and 167.8. The chemical formulas of the two peaks at  $m/z$  151.2 and 167.8, which were resulted from the cleavage between C10 and C11 of the HFA, were  $C_{10}H_{14}OH$  and  $C_9H_{14}COOH$ , respectively. A peak at  $m/z$  121.1 was resulted from the cleavage between C11 and C12 because of the loss of  $C_9H_{13}$  from the HFA. These fragment peaks indicated that the HFA was an 11-hydroxyeicosapentaenoic acid (11-HEPE). The LC-MS/MS fragments of the product obtained from EPA by whole recombinant cells expressing 12-LOX showed the peaks at  $m/z$  139.2 and 179.5. The chemical formulas of the two peaks, which were resulted from the cleavage between C11 and C12 of the HFA, were  $C_9H_{14}OH$  and  $C_{10}H_{14}COOH$ , respectively. These fragment peaks identified that the HFA was a 12-HEPE. The product obtained from DHA by whole recombinant cells expressing 11- and 12-LOX showed a peak at  $m/z$  343.2 as a total molecular mass (MW=344.2) of the HFA (**Supplementary Fig. 8e**). The

LC-MS/MS fragments of the 11- and 12-LOX-derived product showed the peaks at  $m/z$  139.2 and 205.6, which were resulted from the cleavage between C13 and C14 of the HFA. The chemical formulas of the two peaks were  $C_9H_{14}OH$  and  $C_{12}H_{16}COOH$ , respectively. Therefore, the compound was a 14-hydroxydocosaheptaenoic acid (14-HDoHE).

Whole recombinant cells expressing 12-LOX or 11-LOX from *M. xanthus* converted PUFAs to the reaction products hepxilins (HXs), and they were analysed by LC-MS/MS. HXs were produced from PUFAs via hydroperoxyfatty acids (HPFAs) by the twice reactions of 11- or 12-LOX. Whole recombinant cells expressing 11-LOX or 12-LOX converted ARA to the products with total molecular masses of 336.2, which were represented by the peaks at  $m/z$  335.2 [ $M-H^-$ ] (**Supplementary Fig. 9a, d, e**); and whole recombinant cells expressing 12-LOX converted EPA and DHA to the products with total molecular masses of 334.2 and 360.2, which were represented by a peak at  $m/z$  333.3 and 359.4 [ $M-H^-$ ], respectively (**Supplementary Fig. 9b, c**). The LC-MS/MS fragments of the 12-LOX derived product fragments from ARA showed the peaks at  $m/z$  153.2, 183.2, and 195.2 (**Supplementary Fig. 9a**). The chemical formulas of the two peaks at  $m/z$  153.2 and 183.2, which were resulted from the cleavage between C10 and C11 of the HX, were  $C_{10}H_{17}O$  and  $C_9H_{13}OHCOOH$ , respectively. A peak at  $m/z$  195.2 was resulted from the cleavage between C11 and C12 of the epoxide ring in the HX because the chemical formula was  $C_{10}H_{14}OHCOO^{\cdot}$ . These fragment peaks indicated that the compound was an HXB<sub>3</sub>. The LC-MS/MS fragments of the product obtained from EPA by whole recombinant cells expressing 12-LOX showed the peaks at  $m/z$  151.2, 183.2, and 223.8 (**Supplementary Fig. 9b**). Two peaks at  $m/z$  151.2 and 183.2 were resulted from the cleavage between C10 and C11 of the HX and their chemical formulae were  $C_{10}H_{15}O$  and  $C_9H_{13}OHCOOH$ , respectively. A peak at  $m/z$  223.8 was resulted from the cleavage between C12 and C13 from the HX because the chemical formula was  $C_{11}H_{15}OOHCOO^{\cdot}$ . Thus, the fragments indicated that the HX was a HXB<sub>4</sub>. The LC-MS/MS fragments of the 12-LOX derived product from DHA showed the peaks at  $m/z$  179.1, 221.1, and 251.2 (**Supplementary Fig. 9c**). These peaks were resulted from the cleavage between C11 and C12; C13 and C14 in the epoxide; and C14 and C15 of the HX, respectively, and their chemical formulae were  $C_{10}H_{14}COOH$ ,  $C_{12}H_{16}OHCOOH$ , and  $C_{13}H_{17}OOHCOOH$ , respectively. Thus, the HX was suggested as

an HXB<sub>5</sub>. The LC-MS/MS fragments of the 11-LOX derived product from ARA showed the peaks at  $m/z$  97.2, 127.3, 167.2, and 209.2 (**Supplementary Fig. 9d**). The peaks at  $m/z$  97.1 and 167.2 were resulted from the cleavage between C10 and C11; and C13 and C14 of the HX, respectively, because the chemical formulae were C<sub>7</sub>H<sub>13</sub> and C<sub>9</sub>H<sub>14</sub>COOH, respectively. The peaks at  $m/z$  127.3 and 209.2 were resulted from the cleavage between C12 and C13 of the HX, and the chemical formulae were C<sub>8</sub>H<sub>14</sub>OH and C<sub>11</sub>H<sub>16</sub>OCOOH, respectively. Based on these fragments, this HX was suggested as a HXD<sub>3</sub>. The LC-MS/MS fragments of the other 11-LOX derived product from ARA showed the peaks at  $m/z$  139.9, 167.2, 235.1, and 265.1 (**Supplementary Fig. 9e**), which were resulted from the cleavage between C11 and C12 in the epoxide; C10 and C11; C14 and C15; and C15 and C16 of the HX, respectively. The chemical formulae of these fragments were C<sub>9</sub>H<sub>15</sub>OH, C<sub>9</sub>H<sub>14</sub>COOH, C<sub>13</sub>H<sub>18</sub>OCOOH, and C<sub>14</sub>H<sub>19</sub>OOHCOOH, respectively. These results suggested that the compound was an HXE<sub>3</sub>.

The reaction products trioxilins (TrXs) obtained from PUFAs using whole recombinant cells expressing 11- or 12-LOX and epoxide hydrolase (EH) from *M. xanthus* were analysed by LC-MS/MS. The total molecular masses of the products (MW=354.2) obtained from ARA by whole recombinant cells expressing 11- or 12-LOX and EH were represented by the peaks at  $m/z$  353.2 [M-H<sup>-</sup>] (**Supplementary Fig. 10a, d, e**), and the total molecular masses of the products (MW=352.2 and MW=378.2) obtained from EPA and DHA, respectively, by whole recombinant cells were represented by the peaks at  $m/z$  351.2 and 377.2 [M-H<sup>-</sup>], respectively (**Supplementary Fig. 8b, c**). The LC-MS/MS fragments of the 12-LOX and EH derived product fragments from ARA showed the peaks at  $m/z$  153.2, 201.2, and 242.1 (**Supplementary Fig. 10a**). The two peaks at  $m/z$  153.2 and 201.2 were resulted from the cleavage between C9 and C10 of the TrX, and the chemical formulae were C<sub>8</sub>H<sub>12</sub>COOH and C<sub>11</sub>H<sub>18</sub>(OH)<sub>3</sub>, respectively. The chemical formulae of the peak at  $m/z$  242.2 was C<sub>11</sub>H<sub>15</sub>(OH)<sub>3</sub>COO<sup>·</sup>, which were resulted from the cleavage between C12 and C13 of the TrX. These chemical formulae indicated that the compound is a TrXB<sub>3</sub>. The LC-MS/MS fragments of the product obtained from EPA by whole recombinant cells expressing 12-LOX and EH showed the peaks at  $m/z$  198.2 and 242.1 (**Supplementary Fig. 10b**). The chemical formulas of the two peaks, which were resulted from the cleavage between C9 and C10; and C12 and C13 of the TrX, were C<sub>11</sub>H<sub>16</sub>(OH)<sub>2</sub>O<sup>·</sup> and C<sub>11</sub>H<sub>15</sub>(OH)<sub>3</sub>COO<sup>·</sup>,

respectively. These fragment peaks identified that the TrX was a TrXB<sub>4</sub>. The LC-MS/MS fragments of the 12-LOX and EH derived product from DHA showed the peaks at *m/z* 138.2, 178.1, 198.2, and 238.1 (**Supplementary Fig. 10c**). The peaks at *m/z* 138.2 and 238.1 were resulted from the cleavage between C13 and C14 of the TrX because the chemical formulae were C<sub>9</sub>H<sub>14</sub>O<sup>·</sup> and C<sub>12</sub>H<sub>16</sub>(OH)<sub>2</sub>COO<sup>·</sup>, respectively. The peaks at *m/z* 178.1 and 198.2 were resulted from the cleavage between C11 and C12 of the TrX, and the chemical formulae were C<sub>10</sub>H<sub>14</sub>COO<sup>·</sup> and C<sub>11</sub>H<sub>16</sub>(OH)<sub>2</sub>O<sup>·</sup>, respectively. These results suggested that this compound was a TrXB<sub>5</sub>. The LC-MS/MS fragments of the 11-LOX and EH derived product fragments from ARA showed the peaks at *m/z* 167.4, 187.2, 256.2, and 282.1 (**Supplementary Fig. 10d**). The peaks at *m/z* 167.4 and 187.2 were resulted from the cleavage between C10 and C11 of the TrX because the chemical formulae were C<sub>10</sub>H<sub>14</sub>COOH and C<sub>10</sub>H<sub>16</sub>(OH)<sub>3</sub>, respectively. The peaks at *m/z* 256.2 and 282.1 were resulted from the cleavage between C13 and C14; and C15 and C16 of the TrX, respectively, and the chemical formulae were C<sub>12</sub>H<sub>17</sub>(OH)<sub>3</sub>COO<sup>·</sup>, and C<sub>14</sub>H<sub>19</sub>(OH)<sub>3</sub>COO<sup>·</sup>, respectively. These fragment peaks suggested that the TrX was a TrXD<sub>3</sub>. The LC-MS/MS fragments of the other 11-LOX and EH derived product from ARA showed the peaks at *m/z* 157.1, 167.1, 253.2, and 282.1 (**Supplementary Fig. 10e**). The peaks at *m/z* 157.1 and 167.1 were resulted from the cleavage of the hydroxyl group at the C11 position of the TrX because the chemical formulae were C<sub>9</sub>H<sub>15</sub>(OH)<sub>2</sub> and C<sub>9</sub>H<sub>14</sub>COOH, respectively. The peaks at *m/z* 253.2 and 282.1 were resulted from the cleavage of the hydroxyl group at the C14 position because the chemical formulae were C<sub>13</sub>H<sub>18</sub>(OH)<sub>2</sub>COOH and C<sub>14</sub>H<sub>19</sub>(OH)<sub>3</sub>COO<sup>·</sup>, respectively. Based on these fragments, this TrX was suggested as a TrXE<sub>3</sub>.

The NMR analysis of metabolites was used to confirm the structures by recording 1D and 2D NMR spectra. The overlapped peaks of compounds including double bonds were assigned by selective TOCSY and 2D (HSQC and HMBC) NMR results. A double bond is sp<sup>2</sup>, which is structurally fixed. In the case of *E*-geometry of double bond, the protons are 180 degrees apart from each other, so neither NOE peak nor ROE peak does not appear. On the other hand, in the case of *Z*-geometry of double bond, the protons are so close that the ROE peak appears<sup>12, 13</sup>. Based on the identified stereo information of intermediate materials (11*S*-HpETE and 12*S*-HpETE), the stereochemistry were determined by ROESY NMR results.



HXB<sub>3</sub> was identified as (*S*,5*Z*,8*Z*)-10-hydroxy-10-((2*R*,3*S*)-3-((*Z*)-oct-2-en-1-yl)oxiran-2-yl)deca-5,8-dienoic acid (**Supplementary Fig. 13**). The results of 1D NMR of HXB<sub>3</sub> were shown in **Supplementary Fig. 14** and **Supplementary Table 6**. The H-10, H-11, and H-12 had the ROE correlation with each other, indicating the syn geometry (**Supplementary Fig. 15a**). H-12 was also identified as *S*-form because 12*S*-HpETE was identified as *S*-form. H-5, H-6, H-8, H-9, H-14, and H-15 were confirmed with selective TOCSY irradiation on the peak H-3, H-10, and H-17 (**Supplementary Fig. 16**). The coupling constants of J<sub>9</sub>, J<sub>5</sub>, and J<sub>15</sub> were ranging below 11 Hz, and H-14 and H-15 showed the ROE correlation, indicating that the double bonds have *Z* geometry (**Supplementary Fig. 15b**). C-7 and C-10 are composed of sp<sup>3</sup> bonds, which allow both C-7 and C-10 rotate freely. As H-7 and H-10 are very close to each other in the 3D minimized energy calculated molecular structure of HXB<sub>3</sub>, they result in ROE peaks in ROESY NMR. The 2D NMRs of HXB<sub>3</sub> to support additional structural analysis were shown in the **Supplementary Fig. 17**. HXB<sub>4</sub> was shown similar pattern with HXB<sub>3</sub>, thus it was identified as (*S*,5*Z*,8*Z*)-10-hydroxy-10-((2*R*,3*S*)-3-((2*Z*,5*Z*)-octa-2,5-dien-1-yl)oxiran-2-yl)deca-5,8-dienoic acid (**Supplementary Fig. 18**). The 1D NMR was detected by <sup>1</sup>H, <sup>13</sup>C NMR (**Supplementary Fig. 19** and **Supplementary Table 7**). The H-10, H-11, and H-12 had the ROE correlation with each other, indicating the syn geometry (**Supplementary Fig. 20**). H-12 was also identified as *S*-form because 12-HpEPE was identified as *S*-form by CP-HPLC. H-5, H-6, H-8, H-9, H-14, H-15, H-17, and H-18 were confirmed with selective TOCSY irradiation on the peak H-3, H-10, H-12, and H-20 (**Supplementary Fig. 21**). The coupling constants of J<sub>5</sub>, J<sub>9</sub>, J<sub>14</sub>, and J<sub>18</sub> were ranging below 11 Hz, indicating that the double bonds have *Z* geometry. The 2D NMRs of HXB<sub>4</sub> to support additional structural analysis were shown in the **Supplementary Fig. 22**. HXB<sub>5</sub> was derived from DHA and was converted via 14*S*-HpDoHE by ARA 12(*S*)-LOX (*MXAN\_1745*). As HXB<sub>5</sub> was identified as (*S*,4*Z*,7*Z*,10*Z*)-12-hydroxy-12-((2*R*,3*S*)-3-((2*Z*,5*Z*)-octa-2,5-dien-1-yl)oxiran-2-yl)dodeca-4,7,10-trienoic acid (**Supplementary Fig. 23–24** and **Supplementary Table 8**). The H-12, H-13, and H-14 had the ROE correlation with each other, which indicates the syn geometry (**Supplementary Fig. 25**). H-14 was also identified as *S*-form because 14*S*-HpDoHE was identified as *S*-form. H-4, H-5, H-7, H-8, H-10, H-11, H-16, H-17, H-19, and H-20 were confirmed with selective TOCSY irradiation on the peak H-2, H-

6, H-12, H-14, and H-22 (**Supplementary Fig. 26**). The coupling constants of J4, J7, J11, J16, and J20 were ranging below 11 Hz, indicating that the double bonds have *Z* geometry. The support 2D NMR data of HXB<sub>5</sub> were shown in Supplementary figure. 27. ARA 11-LOX (*MXAN\_1744*) originated from *M. xanthus* had the ability of *S*-form as stereoselectivity, meaning that all of the metabolites produced by ARA 11-LOX (*MXAN\_1744*) have *S*-form stereospecificity. The main product HXD<sub>3</sub>, which was converted from ARA by ARA 11(*S*)-LOX, was identified as (5*Z*,8*Z*)-10-((2*S*,3*R*)-3-((*S*,*Z*)-1-hydroxyoct-2-en-1-yl)oxiran-2-yl)deca-5,8-dienoic acid (**Supplementary Fig. 28**). The results of 1D NMR of HXD<sub>3</sub> were shown in **Supplementary Fig. 29** and **Supplementary Table 9**. The H-11, H-12, and H-13 had the ROE correlation with each other, which indicates the syn geometry (**Supplementary Fig. 30a**). H-11 was also identified as *S*-form because ARA 11(*S*)-LOX was identified as *S*-form. H-5, H-6, H-8, H-9, H-14, and H-15 were confirmed with selective TOCSY irradiation on the peak H-3, H-11, and H-13 (**Supplementary Fig. 31**). The coupling constants of J5, J9 and J14 were ranging below 11 Hz, indicating that the double bonds have *Z* geometry. The ROE correlations were showed between H-14 and 15 and between H-8 and 9 (**Supplementary Fig. 30b**). The 2D NMR data of HXD<sub>3</sub> to support additional structural analysis were shown in the **Supplementary Fig. 32**.

Next, we identified the 5 types of TrXs. TrxB<sub>3</sub> was confirmed as (5*Z*,8*Z*,10*S*,11*S*,12*R*,14*Z*)-10,11,12-trihydroxyicosa-5,8,14-trienoic acid (**Supplementary Fig. 33–34** and **Supplementary Table 10**). The H-10, H-11, and H-12 on TrXB<sub>3</sub> had the ROE correlation, indicating the syn geometry (**Supplementary Fig. 35a**). TrXB<sub>3</sub> was converted from HXB<sub>3</sub> by EH (*MXAN\_1644*). H-10 of TrXB<sub>3</sub> was also identified as *S*-form because H-10 of HXB<sub>3</sub> was identified as *S*-form. H-5, H-6, H-8, H-9, H-14, and H-15 were confirmed with selective TOCSY irradiation on the peak H-2, H-10, and H-13 (**Supplementary Fig. 36**). The coupling constants of J5, J9 and J14 were ranging below 11 Hz, indicating that the double bonds have *Z* geometry. The ROE correlations were showed between H-14 and 15 and between H-8 and 9 (**Supplementary Fig. 35b**). The support 2D NMR data of TrXB<sub>3</sub> were shown in **Supplementary Fig. 37**. TrXB<sub>4</sub> was verified as (5*Z*,8*Z*,10*S*,11*S*,12*R*,14*Z*,17*Z*)-10,11,12-trihydroxyicosa-5,8,14,17-tetraenoic acid using NMR analysis (**Supplementary Fig. 38–39** and **Supplementary Table 11**). The H-10, H-11, and H-12 had the ROE

correlation with each other, indicating the syn geometry (**Supplementary Fig. 40a**). H-10 of TrXB<sub>4</sub> was also identified as *S*-form because H-10 of HXB<sub>4</sub> was identified as *S*-form. H-5, H-6, H-8, H-9, H-14, H-15, H-17, and H-18 were confirmed with selective TOCSY irradiation on the peak H-3, H-10, H-12, and H-20 (**Supplementary Fig. 41**). The coupling constants of J<sub>5</sub>, J<sub>9</sub>, J<sub>14</sub> and J<sub>18</sub> were ranging below 11 Hz, indication that the double bonds have *Z* geometry. The ROE correlations were showed between H-14 and 15 and between H-8 and 9 (**Supplementary Fig. 40b**). The 2D NMR data of TrXB<sub>4</sub> to support additional structural analysis were shown in the **Supplementary Fig. 42**. TrXB<sub>5</sub> was identified as (4*Z*,7*Z*,10*Z*,12*S*,13*S*,14*R*,16*Z*,19*Z*)-12,13,14-trihydrodocosa-4,7,10,16,19-pentaenoic acid (**Supplementary Fig. 43–44** and **Supplementary Table 12**). H-12 of HXB<sub>5</sub> was identified as *S*-form, thus H-12 of TrXB<sub>5</sub> was also identified as *S*-form. The H-12, H-13, and H-14 had the ROE correlation with each other, which indicates the syn geometry (**Supplementary Fig. 45a**). H-4, H-5, H-7, H-8, H-10, H-11, H-16, H-17, H-19, and H-20 were confirmed with selective TOCSY irradiation on the peak H-2, H-9, H-12, H-14, and H-22 (**Supplementary Fig. 46**). The coupling constants of J<sub>4</sub>, J<sub>8</sub>, J<sub>11</sub>, J<sub>16</sub>, and J<sub>20</sub> were ranging below 11 Hz, indicating that the double bonds have *Z* geometry. The ROE correlations were showed between H-10 and 11 and between H-16 and 17 (**Supplementary Fig. 45b**). The support 2D NMR data of TrXB<sub>5</sub> were shown in **Supplementary Fig. 47**. TrXD<sub>3</sub> was confirmed as (5*Z*,8*Z*,11*R*,12*S*,13*S*,14*Z*)-11,12,13-trihydroxyicosa-5,8,14-trienoic acid by NMR analysis (**Supplementary Fig. 48–49** and **Supplementary Table 13**). The H-11, H-12, and H-13 had the ROE correlation, which indicate the syn geometry (**Supplementary Fig. 50a**). H-13 of TrXD<sub>3</sub> was also identified as *S*-form because H-13 of HXD<sub>3</sub> was identified as *S*-form. H-5, H-6, H-8, H-9, H-14, and H-15 were confirmed with selective TOCSY irradiation on the peak H-3, H-11, and H-13 (**Supplementary Fig. 51**). The coupling constants of J<sub>5</sub>, J<sub>9</sub>, and J<sub>14</sub> were ranging below 11 Hz and H-8 and H-9 showed the ROE correlation, indicating that the double bonds have *Z* geometry (**Supplementary Fig. 50b**). The 2D NMR data of TrXD<sub>3</sub> to support additional structural analysis were shown in the **Supplementary Fig. 52**. TrXE<sub>3</sub> was identified as (5*Z*,8*Z*,11*R*,12*R*,13*E*)-11,12,15-trihydroxyicosa-5,8,13-trienoic acid (**Supplementary Fig. 53–54** and **Supplementary Table 14**). The H-11 and H-12 had the ROE correlation, which indicate the syn geometry (**Supplementary Fig. 55a**). H-11 of TrXE<sub>3</sub>

was also estimated as *R*-form As H-11 of HXE<sub>3</sub> was estimated as *R*-form (ex, HxD<sub>3</sub> and TrXD<sub>3</sub>). The configuration of H-15 could not be defined because H-15 was too far from H-12 or H-11. H-5, H-6, H-8, H-9, H-13, and H-14 were confirmed with selective TOCSY irradiation on the peak H-3, H-10, and H-12 (**Supplementary Fig. 56**). The coupling constants of J<sub>5</sub>, J<sub>9</sub> were ranging below 11 Hz, indicating that the double bonds have *Z* geometry whereas the coupling constants of J<sub>13</sub>, J<sub>14</sub> were ranging upto 15 Hz, indicating that the double bonds have *E* geometry. H-8 and H-9 had the ROE correlations but H-13 and H-14 did not have any ROE correlations (**Supplementary Fig. 55b**). The 2D NMR data of TrXE<sub>3</sub> to support additional structural analysis were shown in the **Supplementary Fig. 57**.

### Supplementary Methods

**ESI-MS and NMR analysis.** LC-MS/MS analysis of lipid mediators was performed using a Thermo-Finnigan LCQ Deca XP plus ion trap mass spectrometer (Thermo Scientific, Pittsburgh, PA, USA) at the NCIRF facility (Seoul National University, Seoul, South Korea). The instrument consisted of an LC pump, an auto sampler, and a photodiode array detector. Ionization of the samples was carried out using electrospray ionization. The operation was conducted at 275°C capillary temperature, 5 kV ion source voltage, 30 psi nebuliser gas, 46 V capillary voltage in positive mode, 15 V fragmentor voltage in negative ionization mode, 0.01 min average scan time, 0.02 min average time to change polarity, and 35% abundant precursor ions at collision energy. The NMR studies were used to confirm the structures by recording 1D (1H, 13C, selective-TOCSY, 1H homo decoupling) and 2D (COSY, ROESY, TOCSY, HSQC, HMBC) NMR spectra on a Bruker Avance HD (850 MHz) and Avance III (600 MHz), equipped with TCI cryoprobe (NCIRF, Seoul National University). DMSO-d<sub>6</sub> and TMS were used as a solvent and an internal standard, respectively. All chemical shifts were quoted in δ (ppm).

HXB<sub>3</sub>) <sup>1</sup>H NMR (600MHz, DMSO): δ 5.47 (dt, J = 10.89, 5.43 Hz, 1H), 5.41~5.27 (m, 5H), 5.04 (s, 1H), 4.07 (dd, J = 7.65, 6.03 Hz, 1H), 2.82 (td, J= 5.43, 2.17 Hz, 1H), 2.81~2.71 (m, 2H), 2.71 (dd, J = 6.03, 2.17 Hz, 1H), 2.31~2.13 (m, 2H), 2.20 (t, J = 6.44 Hz, 2H), 2.03 (td, J = 7.11, 6.52 Hz, 2H), 1.96 (dt, J = 7.10, 7.05 Hz, 2H), 1.54 (tt, J = 7.11, 6.44 Hz, 2H), 1.34~1.20 (m, 6H), 0.86 (t, J = 6.88 Hz, 3H); <sup>13</sup>C NMR (150

MHz, DMSO):  $\delta$  174.3, 132.3, 129.5, 129.4, 129.3, 128.1, 123.8, 67.1, 60.7, 54.7, 33.0, 30.8, 29.0, 28.9, 26.7, 26.1, 25.8, 24.4, 21.9, 13.9; ESI-MS (m/z):  $[M-H^-]$  calcd. for  $C_{20}H_{31}O_4$ , 335.2; found, 335.2; analysis (calcd., found for  $C_{20}H_{31}O_4$ ):  $C_{10}H_{17}O$  (153.1, 153.2),  $C_9H_{13}OHCOOH$  (183.1, 183.2),  $C_{10}H_{14}OHCOO\cdot$  (195.1, 195.2).

HXB<sub>4</sub>)  $^1H$  NMR (600MHz, DMSO):  $\delta$  5.46~5.24 (m, 8H), 4.08 (dd, J = 7.63, 6.00 Hz, 1H), 2.84 (td, J = 8.15, 2.20 Hz, 1H), 2.83~2.72 (m, 2H), 2.74 (dd, J = 6.68, 6.62 Hz, 1H), 2.72 (dd, J = 6.00, 2.20 Hz, 1H), 2.32 (m, 1H), 2.21 (m, 1H), 2.20 (t, J = 7.41 Hz, 2H), 2.04 (dt, J = 6.55, 7.02 Hz, 2H), 2.03 (dt, J = 6.95, 7.53 Hz, 2H), 1.54 (tt, J = 7.41, 7.02 Hz, 2H), 0.91 (t, J = 7.53 Hz, 3H);  $^{13}C$  NMR (150 MHz, DMSO):  $\delta$  174.3, 131.6, 130.4, 129.5, 129.4, 128.1, 126.8, 124.0, 67.1, 60.7, 54.5, 33.1, 29.0, 26.1, 25.8, 25.2, 24.4, 20.0, 14.1. ESI-MS (m/z):  $[M-H^-]$  calcd. for  $C_{20}H_{29}O_4$ , 333.2; found, 333.3; analysis (calcd., found for  $C_{20}H_{29}O_4$ ):  $C_{10}H_{15}O$  (151.1, 151.2),  $C_9H_{13}OHCOOH$  (183.1, 183.2),  $C_{11}H_{15}OOHCOO\cdot$  (223.2, 223.8).

HXB<sub>5</sub>)  $^1H$  NMR (850MHz, DMSO):  $\delta$  5.51~5.23 (m, 10H), 4.09 (dd, J = 5.95, 8.34 Hz, 1H), 2.84 (m, 1H), 2.78 (m, 4H), 2.74 (t, J = 7.16 Hz, 2H), 2.72 (dd, J 2.02, 5.95 Hz, 1H), 2.32 (m, 1H), 2.24 ( dt, J = 6.93 Hz, 2H), 2.21 (m, 1H), 2.20 (t, J = 6.93 Hz, 2H), 2.02 (dt, J = 7.03, 7.52 Hz, 2H), 0.92 (t, J = 7.52 Hz, 3H);  $^{13}C$  NMR (212 MHz, DMSO):  $\delta$  174.2, 131.6, 130.4, 129.7, 129.6, 129.4, 128.9, 128.3, 128.1, 126.9, 124.0, 67.1, 60.7, 54.8, 34.2, 39.0, 25.2, 22.7, 20.0, 14.1. ESI-MS (m/z):  $[M-H^-]$  calcd. for  $C_{22}H_{31}O_4$ , 359.1; found, 359.4; analysis (calcd., found for  $C_{22}H_{31}O_4$ ):  $C_{10}H_{14}COOH$  (179.2, 179.1),  $C_{12}H_{16}OHCOOH$  (221.2, 221.1),  $C_{13}H_{17}OOHCOOH$  (251.1, 251.2).

HXD<sub>3</sub>)  $^1H$  NMR (600MHz, DMSO):  $\delta$  5.45~5.39 (m 2H), 5.36~5.29 (m, 4H), 4.00 (dd, J = 8.63, 6.11, 1H), 2.81 (dt, J = 2.15, 5.42 Hz, 1H), 2.74 (dd, J = 5.72, 4.17 Hz, 2H), 2.70 (dd, J = 2.15, 6.11 Hz, 1H), 2.33 (m, 1H), 2.21 (m, 1H), 2.20 (t, J = 6.38 Hz, 2H), 2.04 (dt, J = 7.08, 5.74 Hz, 2H), 1.99 (dt, J = 4.36, 6.84 Hz, 2H), 1.54 (tt, J = 6.38, 7.08 Hz, 2H), 1.31~1.19 (m, 6H), 0.85 (t, J = 7.04 Hz, 3H);  $^{13}C$  NMR (150 MHz, DMSO):  $\delta$  174.4, 131.5, 130.3, 129.6, 139.2, 128.1, 124.0, 33.0, 31.1, 29.2, 26.6, 26.0, 24.4, 21.9, 13.8. ESI-MS (m/z):  $[M-H^-]$  calcd. for  $C_{20}H_{31}O_4$ , 335.2; found, 335.2; analysis (calcd., found for  $C_{20}H_{31}O_4$ ):  $C_7H_{13}$  (97.1, 97.2),  $C_8H_{14}OH$  127.1, 127.3),  $C_9H_{14}OHCOOH$  (167.1, 167.3),  $C_{11}H_{16}OCOOH$  (209.1, 209.2).

HXE<sub>3</sub>) ESI-MS (m/z):  $[M-H^-]$  calcd. for  $C_{20}H_{31}O_4$ , 335.2; found, 335.2; analysis (calcd., found for  $C_{20}H_{31}O_4$ ):  $C_9H_{15}OH$  (139.1, 139.9),  $C_9H_{14}COOH$  (167.1, 167.2),

$C_{13}H_{18}O_5$  (235.3, 235.1),  $C_{14}H_{19}O_5$  (265.1, 265.1).

TrXB<sub>3</sub>)  $^1H$  NMR (600MHz, DMSO):  $\delta$  5.53~5.43 (m, 2H), 5.41~5.27 (m, 4H), 4.50 (dd,  $J = 8.75, 2.92$  Hz, 1H), 3.44 (dd,  $J = 7.27, 8.35$  Hz, 1H), 3.03 (dd,  $J = 7.27, 2.92$  Hz, 1H), 2.83 (m, 1H), 2.73 (m, 1H), 2.35 (m, 1H), 2.19 (t,  $J = 7.35$  Hz, 2H), 2.07~1.94 (m, 5H), 1.54 (tt,  $J = 7.20, 7.35$  Hz, 2H), 1.34~1.18 (m, 6H), 0.86 (t,  $J = 6.82$  Hz, 3H);  $^{13}C$  NMR (150 MHz, DMSO):  $\delta$  174.5, 132.2, 130.3, 128.4, 127.8, 33.7, 31.1, 30.9, 29.0, 26.6, 26.5, 24.5, 22.0, 13.9. ESI-MS ( $m/z$ ):  $[M-H^-]$  calcd. for  $C_{20}H_{33}O_5$ , 353.2; found, 353.2; analysis (calcd., found for  $C_{20}H_{33}O_5$ ):  $C_8H_{12}COOH$  (153.2, 153.2),  $C_{11}H_{18}(OH)_3$  (201.1, 201.2),  $C_{11}H_{15}(OH)_3COO\cdot$  (242.2, 242.1).

TrXB<sub>4</sub>)  $^1H$  NMR (850MHz, DMSO):  $\delta$  5.52 (m, 1H), 5.51 (dd,  $J = 9.49, 9.25$  Hz, 1H), 5.40~5.24 (m, 6H), 4.63 (dd,  $J = 8.74, 1.57$  Hz, 1H), 3.47 (ddd,  $J = 8.38, 8.16, 2.77$  Hz, 1H), 2.98 (m, 1H), 2.89 (dd,  $J = 8.16, 1.57$  Hz, 1H), 2.87 (m, 1H), 2.75 (m, 2H), 2.40 (m, 1H), 2.17~1.88 (m, 7H), 1.49 (m, 1H), 0.92 (t,  $J = 7.52$  Hz, 3H);  $^{13}C$  NMR (212 MHz, DMSO):  $\delta$  176.3, 131.9, 131.2, 129.7, 128.2, 127.9, 127.5, 127.1, 77.5, 70.0, 64.4, 35.8, 31.0, 26.6, 25.9, 25.8, 25.4, 20.0, 14.2. ESI-MS ( $m/z$ ):  $[M-H^-]$  calcd. for  $C_{20}H_{31}O_5$ , 351.2; found, 351.2; analysis (calcd., found for  $C_{20}H_{31}O_5$ ):  $C_{11}H_{16}(OH)_2O\cdot$  (198.2, 198.2),  $C_{11}H_{15}(OH)_3COO\cdot$  (242.2, 242.1).

TrXB<sub>5</sub>)  $^1H$  NMR (600MHz, DMSO):  $\delta$  5.55~5.47 (m, 2H), 5.39~5.25 (m, 8H), 4.53 (dd,  $J = 8.89, 2.25$  Hz, 1H), 3.47 (ddd,  $J = 2.74, 7.49, 8.19$  Hz, 1H), 3.04 (dd,  $J = 7.49, 2.25$  Hz, 1H), 2.88 (m, 1H), 2.83~2.72 (m, 5H), 2.38 (m, 1H), 2.25 (dt,  $J = 6.45$  Hz, 2H), 2.21 (t,  $J = 6.45$  Hz, 2H), 2.06 (m, 1H), 2.03 (dt,  $J = 6.82, 7.53$  Hz, 2H), 0.92 (t,  $J = 7.53$  Hz, 3H);  $^{13}C$  NMR (150 MHz, DMSO):  $\delta$  174.3, 132.1, 131.3, 128.7, 128.3, 128.0, 127.8, 127.7, 127.6, 127.4, 76.9, 70.3, 65.6, 34.3, 31.0, 25.7, 25.3, 25.1, 22.7, 20.0, 14.1. ESI-MS ( $m/z$ ):  $[M-H^-]$  calcd. for  $C_{22}H_{33}O_5$ , 377.1; found, 377.2; analysis (calcd., found for  $C_{22}H_{33}O_5$ ):  $C_9H_{14}O\cdot$  (138.1, 138.2),  $C_{10}H_{14}COO\cdot$  (178.1, 178.1),  $C_{11}H_{16}(OH)_2O\cdot$  (198.1, 198.2),  $C_{12}H_{16}(OH)_2COO\cdot$  (238.2, 238.1).

TrXD<sub>3</sub>)  $^1H$  NMR (850MHz, DMSO):  $\delta$  5.49 (m, 1H), 5.37~5.28 (m, 5H), 4.35 (dd,  $J = 7.52, 4.62$  Hz, 1H), 3.32 (td,  $J = 7.27, 2.97$  Hz, 1H), 3.26 (dd,  $J = 4.62, 7.27$  Hz, 1H), 7.47 (m, 2H), 2.38 (m, 1H), 2.17 (t,  $J = 7.22$  Hz, 2H), 2.10~1.96 (m, 5H), 1.53 (tt,  $J = 6.36, 7.22$  Hz, 2H), 1.36~1.18 (m, 6H), 0.86 (t,  $J = 6.86$  Hz, 3H);  $^{13}C$  NMR (212 MHz, DMSO):  $\delta$  174.7, 131.1, 130.5, 129.1, 128.6, 128.3, 127.6, 76.7, 71.5, 67.7, 33.5, 31.0, 30.9, 28.8, 27.3, 26.1, 25.4, 24.7, 22.0, 13.9. ESI-MS ( $m/z$ ):  $[M-H^-]$  calcd. for

C<sub>20</sub>H<sub>33</sub>O<sub>5</sub>, 353.2; found, 353.2; analysis (calcd., found for C<sub>20</sub>H<sub>33</sub>O<sub>5</sub>): C<sub>10</sub>H<sub>14</sub>COOH (167.2, 167.4), C<sub>10</sub>H<sub>16</sub>(OH)<sub>3</sub> (187.1, 187.2), C<sub>12</sub>H<sub>17</sub>(OH)<sub>3</sub>COO· (256.2, 256.2), C<sub>14</sub>H<sub>19</sub>(OH)<sub>3</sub>COO· (282.2, 282.1).

TrXE<sub>3</sub>) <sup>1</sup>H NMR (850MHz, DMSO): δ 5.61 (dd, J = 15.78, 5.36 Hz, 1H), 5.55 (dd, 15.78, 6.23 Hz, 1H), 5.44 (m, 1H), 5.35~5.29 (m, 3H), 3.89 (m, 1H), 3.81 (dd, J = 4.53, 5.36 Hz, 1H), 3.29 (m, 1H), 2.74 (m, 1H), 2.71 (m, 1H), 2.19 (m, 1H), 2.10 (t, J = 7.03 Hz, 2H), 2.02 (m, 2H), 1.50 (tt, J = 6.04, 7.03 Hz, 2H), 1.41~1.18 (m, 8H), 0.85 (t, J = 7.09 Hz, 3H); <sup>13</sup>C NMR (212 MHz, DMSO): δ 175.0, 134.5, 129.8, 129.3, 128.4, 127.6, 74.2, 70.6, 37.4, 34.4, 31.4, 30.3, 26.4, 25.5, 25.1, 24.8, 22.2, 14.0. ESI-MS (m/z): [M-H<sup>-</sup>] calcd. for C<sub>20</sub>H<sub>33</sub>O<sub>5</sub>, 353.2; found, 353.2; analysis (calcd., found for C<sub>20</sub>H<sub>33</sub>O<sub>5</sub>): C<sub>9</sub>H<sub>15</sub>(OH)<sub>2</sub> (157.2, 157.1), C<sub>9</sub>H<sub>14</sub>COOH (167.2, 167.1), C<sub>13</sub>H<sub>18</sub>(OH)<sub>2</sub>COOH (253.2, 253.2), C<sub>14</sub>H<sub>19</sub>(OH)<sub>3</sub>COO· (282.2, 282.1).

## Supplementary References

1. Derewlany LO, Pace-Asciak CR, Radde IC. Hepoxilin A<sub>3</sub>, hydroxyepoxide metabolite of arachidonic acid, stimulates transport of <sup>45</sup>Ca across the guinea pig visceral yolk sac. *Can J Physiol Pharmacol* **62**, 1466-1469 (1984).
2. Pace-Asciak CR. Formation of hepoxilin A<sub>4</sub>, B<sub>4</sub> and the corresponding trioxilins from 12(S)-hydroperoxy-5,8,10,14,17-icosapentaenoic acid. *Prostaglandins Leukot Med* **22**, 1-9 (1986).
3. Reynaud D, Pace-Asciak CR. Docosahexaenoic acid causes accumulation of free arachidonic acid in rat pineal gland and hippocampus to form hepoxilins from both substrates. *Biochim Biophys Acta* **1346**, 305-316 (1997).
4. Reynaud D, Ali M, Demin P, Pace-Asciak CR. Formation of 14,15-hepoxilins of the A<sub>3</sub> and B<sub>3</sub> series through a 15-lipoxygenase and hydroperoxide isomerase present in garlic roots. *J Biol Chem* **274**, 28213-28218 (1999).
5. Pfister SL, Spitzbarth N, Nithipatikom K, Falck JR, Campbell WB. Metabolism of 12-hydroperoxyeicosatetraenoic acid to vasodilatory trioxilin C<sub>3</sub> by rabbit aorta. *BBA Gen Subjects* **1622**, 6-13 (2003).
6. An JU, Kim BJ, Hong SH, Oh DK. Characterization of an ω-6 linoleate

- lipoxygenase from *Burkholderia thailandensis* and its application in the production of 13-hydroxyoctadecadienoic acid. *Appl Microbiol Biotechnol* **99**, 5487-5497 (2015).
7. Vance RE, Hong S, Gronert K, Serhan CN, Mekalanos JJ. The opportunistic pathogen *Pseudomonas aeruginosa* carries a secretable arachidonate 15-lipoxygenase. *Proc Natl Acad Sci USA* **101**, 2135-2139 (2004).
  8. Vidal-Mas J, Busquets M, Manresa A. Cloning and expression of a lipoxygenase from *Pseudomonas aeruginosa* 42A2. *Anton Leeuw Int J G* **87**, 245-251 (2005).
  9. Andreou A, Gobel C, Hamberg M, Feussner I. A bisallylic mini-lipoxygenase from cyanobacterium *Cyanothece* sp. that has an iron as cofactor. *J Biol Chem* **285**, 14178-14186 (2010).
  10. Lang I, Gobel C, Porzel A, Heilmann I, Feussner I. A lipoxygenase with linoleate diol synthase activity from *Nostoc* sp. PCC 7120. *Biochem J* **410**, 347-357 (2008).
  11. Gao BL, Boeglin WE, Brash AR.  $\omega$ -3 fatty acids are oxygenated at the n-7 carbon by the lipoxygenase domain of a fusion protein in the cyanobacterium *Acaryochloris marina*. *BBA Mol Cell Biol Lipids* **1801**, 58-63 (2010).
  12. Jie MS, Lau MM. Novel lipidic enaminones from a C18 keto-allenic ester. *Lipids* **35**, 1135-1145 (2000).
  13. John EB, Jon ON, John FO, R. H. Diastereoselective synthesis of phycocyanobilin-cysteine adducts. *J Am Chem Soc* **113**, 8024-8035 (1991).
